# Supplementary material for: Integrated genetic and clinical prognostic factors for aggressive adult T-cell leukemia/lymphoma
Source: PubMed Central journal article supplement — Haematologica. 2023 Feb 16;108(8):2178–91. doi: 10.3324/haematol.2022.281510 (PMC10388278; doi:10.3324/haematol.2022.281510), 2023-02-16
Supplement: 2022_281510_KAMEDA_SUPPL.pdf [file 2022_281510_KAMEDA_SUPPL.pdf]

# Integrated genetic and clinical prognostic factors for aggressive adult T-cell leukemia/lymphoma

Takuro Kameda,<sup>1</sup> Keisuke Kataoka,<sup>2,3\*</sup> Ayako Kamiunten,<sup>1</sup> Michihiro Hidaka,<sup>4</sup> Hiroaki Miyoshi,<sup>5</sup> Nobuaki Nakano,<sup>6</sup> Kisato Nosaka,<sup>7</sup> Makoto Yoshimitsu,<sup>8</sup> Jun-ichirou Yasunaga,<sup>7,9</sup> Yasunori Kogure,<sup>3</sup> Kotaro Shide,<sup>1</sup> Masaharu Miyahara,<sup>10</sup> Takashi Sakamoto,<sup>11</sup> Keiichi Akizuki,<sup>1</sup> Tomonori Hidaka,<sup>1</sup> Yoko Kubuki,<sup>1</sup> Junji Koya,<sup>3</sup> Noriaki Kawano,<sup>12</sup> Kiyoshi Yamashita,<sup>12</sup> Hiroshi Kawano,<sup>1,3</sup> Takanori Toyama,<sup>14</sup> Kouichi Maeda,<sup>15</sup> Kosuke Marutsuka,<sup>16</sup> Yoshitaka Imaizumi,<sup>17</sup> Koji Kato,<sup>18</sup> Takeshi Sugio,<sup>18</sup> Masahito Tokunaga,<sup>6</sup> Yukie Tashiro,<sup>19</sup> Akifumi Takaori-Kondo,<sup>11</sup> Yasushi Miyazaki,<sup>17</sup> Koichi Akashi,<sup>18</sup> Kenji Ishitsuka,<sup>8</sup> Masao Matsuoka,<sup>7</sup> Koichi Ohshima,<sup>5</sup> Toshiki Watanabe,<sup>20\*</sup> Akira Kitanaka,<sup>21</sup> Atee Utsunomiya,<sup>6</sup> Seishi Ogawa<sup>22\*</sup> and Kazuya Shimoda<sup>1\*</sup>

<sup>1</sup>Division of Hematology, Diabetes, and Endocrinology, Department of Internal Medicine, Faculty of Medicine, University of Miyazaki, Miyazaki; <sup>2</sup>Division of Hematology, Department of Medicine, Keio University School of Medicine, Tokyo; <sup>3</sup>Division of Molecular Oncology, National Cancer Center Research Institute, Tokyo; <sup>4</sup>National Hospital Organization Kumamoto Medical Center, Kumamoto; <sup>5</sup>Department of Pathology, Kurume University School of Medicine, Kurume; <sup>6</sup>Department of Hematology, Imamura General Hospital, Kagoshima; <sup>7</sup>Department of Hematology, Rheumatology and Infectious Diseases, Faculty of Life Sciences, Kumamoto University of Medicine, Kumamoto; <sup>8</sup>Department of Hematology and Rheumatology, Kagoshima University Hospital, Kagoshima; <sup>9</sup>Institute for Frontier Life and Medical Sciences, Kyoto University, Kyoto; <sup>10</sup>Department of Internal Medicine, Karatsu Red Cross Hospital, Saga; <sup>11</sup>Department of Hematology and Oncology, Graduate School of Medicine, Kyoto University, Kyoto; <sup>12</sup>Department of Internal Medicine, Miyazaki Prefectural Miyazaki Hospital, Miyazaki; <sup>13</sup>Department of Internal Medicine, Koga General Hospital, Miyazaki; <sup>14</sup>Department of Internal Medicine, Miyazaki Prefectural Nobeoka Hospital, Miyazaki; <sup>15</sup>National Hospital Organization Miyakonojo Medical Center, Miyazaki; <sup>16</sup>Department of Anatomic Pathology, Miyazaki Prefectural Miyazaki Hospital, Miyazaki; <sup>17</sup>Department of Hematology, Atomic Bomb Disease and Hibakusha Medicine Unit, Atomic Bomb Disease Institute, Nagasaki University, Nagasaki; <sup>18</sup>Department of Medicine and Biosystemic Science, Kyushu University Graduate School of Medical Sciences, Fukuoka; <sup>19</sup>Department of Pathology, Imamura General Hospital, Kagoshima; <sup>20</sup>Department of Practical Management of Medical Information, St Marianna University, Graduate School of Medicine, Tokyo; <sup>21</sup>Department of Laboratory Medicine, Kawasaki Medical School, Kurashiki and <sup>22</sup>Department of Pathology and Tumor Biology, Graduate School of Medicine, Kyoto University, Kyoto, Japan

\*KK, SO and KS contributed equally to this work.

**Correspondence:** K. Shimoda  
[kshimoda@med.miyazaki-u.ac.jp](mailto:kshimoda@med.miyazaki-u.ac.jp)

**Received:** June 6, 2022.

**Accepted:** February 7, 2023.

**Early view:** February 16, 2023.

<https://doi.org/10.3324/haematol.2022.281510>

©2023 Ferrata Storti Foundation

Published under a CC BY-NC license

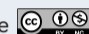

## **Supplemental Information**

### **Summary of Supplemental Information**

**Supplemental Methods** explain our methods regarding the diagnostic criteria, collection of clinical data and tumor DNA, targeted capture sequencing, detailed statistical methods, statistical software, and elastic-net penalized Cox regression.

**Supplemental Table 1** lists mutated genes analyzed in this study.

**Supplemental Table 2** lists the mutations detected in the entire study cohort.

**Supplemental Table 3** lists the associations between clinical variables or risk factors and gene mutations.

**Supplemental Table 4** lists the results of the elastic-net penalized Cox regression.

**Supplemental Figure 1** shows patient flow for the training and validation cohorts.

**Supplemental Figure 2** shows overall survival of the training cohort.

**Supplemental Figure 3** shows mutation frequencies of the training and validation cohorts.

**Supplemental Figure 4** shows targeted mutational landscapes of the training and validation cohorts.

**Supplemental Figure 5** shows the frequencies of mutated genes by mutation status for the 13 most commonly mutated genes.

**Supplemental Figure 6** shows the positions and frequencies of mutations in representative genes.

**Supplemental Figure 7** shows the results of univariate Cox analysis and survival curves for significant genes.

**Supplemental Figure 8** shows co-occurrence relationships between mutated genes.

**Supplemental Figure 9** shows survival curves for different mutational combinations.

**Supplemental Figure 10** shows a comparison of risk categories determined by the m7-ATLPI considering mutations only vs. mutations plus copy number alterations (CNAs).

**Supplemental Figure 11** shows the prognostic value of the m7-ATLPI for overall survival in the entire study cohort.

**Supplemental Figure 12** shows the prognostic value of the m7-ATLPI in patients who received immunochemotherapy or allo-HSCT.

**Supplemental Figure 13** shows survival curves according to *CCR4* mutational status in patients treated with immunochemotherapy.

### **Supplemental Reference**

## **Supplemental Methods**

### **Diagnostic criteria**

Diagnostic criteria of patients with aggressive ATL were based on the World Health Organization classification, and patients were classified into acute, lymphoma, and unfavorable chronic subtypes according to the International Consensus Meeting proposal<sup>1,2</sup>. HTLV-1 infection was documented in all patients.

### **Collection of clinical data**

Detailed clinical data were collected by case report form, and included the following.

Data at diagnosis: date of diagnosis, age at diagnosis, sex, Eastern Cooperative Oncology Group performance status, complete blood count, lactate dehydrogenase level, blood urea nitrogen level, corrected calcium level, C-reactive protein level, albumin level, soluble interleukin-2 receptor level, and the Ann Arbor staging classification.

Treatment-related data: treatment regimens, date of allogeneic hematopoietic stem-cell transplantation (allo-HSCT), and date of mogamulizumab administration. Survival data: date of last follow-up or death.

### **Collection of tumor DNA**

Samples were collected according to approved protocols. Fresh samples were collected from patients after written informed consent was obtained. Frozen and formalin-fixed paraffin-embedded (FFPE) samples were collected from patients who had provided informed consent in the form of an opt-out on the website. Genomic DNA was isolated from peripheral blood or tumor ATL cells using the QIAamp DNA Mini Kit (Qiagen), or from 3-5 sections of 10-20  $\mu\text{m}$  slices of formalin-fixed paraffin-embedded tumor biopsies using the QIAamp DNA FFPE Tissue Kit (Qiagen).

### **Targeted capture sequencing**

Mutation analysis of blood or tissue samples obtained before treatment was performed by targeted sequencing, as previously reported<sup>4</sup>. Targeted capture was performed using a SureSelect Custom Kit (Agilent Technologies), which was designed to capture 50 recurrently mutated genes (Supplemental Table 1). Somatic mutations were called by Genomon pipeline version 2.6.2 (<https://github.com/Genomon-Project/>), and filtered by removing (i) synonymous single nucleotide variants (SNVs); (ii) known variants listed in the SNP databases unless they were identified  $\geq 10$  times in COSMIC database

version 70; (iii) variants only present in unidirectional reads; (iv) variants occurring within repetitive genomic regions; and (v) variants with supporting reads < 4 in tumors. Unless identical mutations were (i) detected in other ATL cases or (ii) counted  $\geq 10$  times in COSMIC database version 70, candidate mutations were further filtered by excluding (i) mutations with allele frequency < 0.1 and (ii) all missense SNVs with allele frequency of 0.4–0.6 or 0.9–1. Finally, mapping errors were removed by visual inspection with the Integrative Genomics Viewer. The mean sequencing depth was 1,026 x.

### **Detailed statistical methods**

Comparisons of patient characteristics between groups were carried out with the Mann–Whitney U test and Fisher’s exact tests for continuous and categorical variables, respectively. The Kaplan-Meier method was used to estimate OS, and the log-rank test was used to assess differences in OS between patient groups. The effects of risk factors on overall survival (OS) were evaluated by Cox proportional hazards regression modeling with or without adjustment for clinical factors. For the training set, we performed univariable and multivariable analyses for genes mutated in 15% or more of the individuals in the cohort; that is, these genes were studied for their correlation with

the ATL-PI and its individual components, as well as other clinical parameters and outcomes. The Bonferroni–Holm procedure was used to adjust for multiple testing. Correlation matrix analysis was performed to explore the statistically co-occurring combinations of genetic variants, and the FDR procedure was used to adjust for multiple testing. The aim of this study was to generate a clinicogenetic risk model to predict the prognosis of first-line intensive cytotoxic chemotherapy. Therefore, when developing the clinicogenetic risk models, patients who received mogamulizumab therapy or underwent allo-HSCT were censored on the day of mogamulizumab administration or allo-HSCT, respectively, to reduce the impact of these therapies on OS. To increase model stability, we considered clinical variables and the 13 genes with a mutation frequency of 15% or higher, irrespective of the results of univariable testing. For feature selection, we used elastic-net regression with a Cox proportional hazards model<sup>18</sup>. In the final model, a prognostic score was calculated as the sum of predictor values weighted by the elastic net coefficients, then the ranked prognostic scores of approximately the top and bottom 20th percentiles were set as cutoffs to divide each cohort into low-, intermediate-, and high-risk groups. This elastic-net model was trained only on the training set, and was then applied to the independent validation set to obtain predictions. The predictions were evaluated using the hazard ratio (HR), log-rank test,

C-index, and time-dependent receiver operating characteristic (ROC) metrics. P values were calculated using two-sided tests, where  $p < 0.05$  was considered statistically significant.

### **Statistical software**

Statistical analyses were performed using R (version 4.1.2) and the R packages ggplot2 (version 3.3.5), corrplot (version 0.91), survival (version 3.2-13), glmnet (version 4.1-2), survcomp (version 1.40.0), and timeROC (version 0.4).

### **Elastic-net penalized Cox regression**

The elastic net is a regularized regression framework that is a linear combination of the L1 (Lasso regression) and L2 (Ridge regression) penalties<sup>5</sup>. The performance of the model was rigorously evaluated using 10-fold cross-validation that was repeated 100 times. The optimal parameters that minimized the mean squared error were selected, then the elastic-net coefficients were determined.

## Supplemental Tables



**Supplemental Table 1. Mutated genes analyzed in this study.**

|                |               |                |               |                |              |                |                |                  |              |
|----------------|---------------|----------------|---------------|----------------|--------------|----------------|----------------|------------------|--------------|
| <i>PLCG1</i>   | <i>PRKCB</i>  | <i>CCR4</i>    | <i>CARD11</i> | <i>STAT3</i>   | <i>TP53</i>  | <i>VAV1</i>    | <i>TBL1XR1</i> | <i>NOTCH1</i>    | <i>GATA3</i> |
| <i>IRF4</i>    | <i>FAS</i>    | <i>CCR7</i>    | <i>POT1</i>   | <i>IRF2BP2</i> | <i>TET2</i>  | <i>RHOA</i>    | <i>HLA-B</i>   | <i>HNRNPA2B1</i> | <i>EP300</i> |
| <i>CD58</i>    | <i>GPR183</i> | <i>CSNK1A1</i> | <i>CSNK2B</i> | <i>CBLB</i>    | <i>FYN</i>   | <i>B2M</i>     | <i>SETD2</i>   | <i>ZNF638</i>    | <i>ATXN1</i> |
| <i>CSNK2A1</i> | <i>ZEB1</i>   | <i>CD28</i>    | <i>KDM6A</i>  | <i>PIK3CD</i>  | <i>S1PR1</i> | <i>ZFP36L2</i> | <i>JAK3</i>    | <i>DNMT3A</i>    | <i>PTPRC</i> |
| <i>YTHDF2</i>  | <i>PDE7B</i>  | <i>CDKN2A</i>  | <i>NOXA1</i>  | <i>RELA</i>    | <i>IDH2</i>  | <i>TNFAIP3</i> | <i>NFKBIA</i>  | <i>KMO</i>       | <i>IKBKB</i> |

Supplemental Table 2. Somatic mutations detected by targeted capture sequencing in 183 ATL cases

| Gene    | Type of mutation     | Accession number | Base change    | Amino acid change | Chromosome | Start     | End                            | Ref | Alt | Depth | Variant allele frequency | Cohort   | Case ID     |
|---------|----------------------|------------------|----------------|-------------------|------------|-----------|--------------------------------|-----|-----|-------|--------------------------|----------|-------------|
| KMO     | non-synonymous SNV   | NM_003679        | c.G1343A       | p.R449Q           | 1          | 241755337 | 241755337 G                    |     | A   | 588   | 0.364                    | Training | Haem_ATL_1  |
| CCRA    | stopgain             | NM_005508        | c.C993A        | p.Y331X           | 3          | 32995907  | 32995907 C                     |     | A   | 752   | 0.533                    | Training | Haem_ATL_1  |
| CCRA    | frameshift deletion  | NM_005508        | c.998_1020del  | p.G333b           | 3          | 32995912  | 32995934 GGCTCTCAAATTAAGTCTGCT |     | A   | 1342  | 0.124                    | Training | Haem_ATL_2  |
| TBL1XR1 | non-synonymous SNV   | NM_024665        | c.C1168T       | p.H390Y           | 3          | 176752068 | 176752068 G                    |     | A   | 592   | 0.421                    | Training | Haem_ATL_2  |
| CARD11  | non-synonymous SNV   | NM_032415        | c.C1853G       | p.S618C           | 7          | 2963954   | 2963954 G                      |     | C   | 798   | 0.264                    | Training | Haem_ATL_2  |
| RELA    | non-synonymous SNV   | NM_021975        | c.G115C        | p.E39Q            | 11         | 65429479  | 65429479 C                     |     | C   | 1064  | 0.282                    | Training | Haem_ATL_2  |
| PRKCB   | non-synonymous SNV   | NM_002738        | c.G1279A       | p.D427N           | 16         | 24183630  | 24183630 G                     |     | A   | 1010  | 0.421                    | Training | Haem_ATL_2  |
| TP53    | non-synonymous SNV   | NM_000546        | c.G124G        | p.S242S           | 17         | 7577519   | 7577527 GATGGTGGAG             |     | C   | 663   | 0.253                    | Training | Haem_ATL_2  |
| STAT3   | non-synonymous SNV   | NM_003150        | c.C182G        | p.S614R           | 2          | 40475068  | 40475068 G                     |     | C   | 866   | 0.402                    | Training | Haem_ATL_2  |
| YAV1    | non-synonymous SNV   | NM_005428        | c.C2368T       | p.R790C           | 19         | 6853993   | 6853993 C                      |     | T   | 973   | 0.049                    | Training | Haem_ATL_2  |
| PLCG1   | non-synonymous SNV   | NM_002660        | c.G3493C       | p.D1165H          | 20         | 39802390  | 39802390 G                     |     | C   | 1122  | 0.029                    | Training | Haem_ATL_2  |
| TET2    | non-synonymous SNV   | NM_001127208     | c.T3686G       | p.L1229R          | 4          | 106164818 | 106164818 T                    |     | G   | 286   | 0.378                    | Training | Haem_ATL_3  |
| IKKB    | non-synonymous SNV   | NM_001556        | c.G607A        | p.V2031           | 8          | 42166458  | 42166458 G                     |     | A   | 312   | 0.423                    | Training | Haem_ATL_3  |
| NOTCH1  | stopgain             | NM_017617        | c.C7318T       | p.Q2440X          | 9          | 139390873 | 139390873 G                    |     | A   | 291   | 0.172                    | Training | Haem_ATL_3  |
| GATA3   | splicing             | NM_002051        | c.2411+1G>A    | NA                | 10         | 8097860   | 8097860 G                      |     | A   | 276   | 0.467                    | Training | Haem_ATL_3  |
| PRKCB   | non-synonymous SNV   | NM_002738        | c.G1279A       | p.D427N           | 16         | 24183630  | 24183630 G                     |     | A   | 284   | 0.067                    | Training | Haem_ATL_3  |
| YTHDF2  | frameshift insertion | NM_016258        | c.T124pT       | p.A237b           | 1          | 29069493  | 29069493 -                     |     | T   | 429   | 0.142                    | Training | Haem_ATL_4  |
| IFI4    | non-synonymous SNV   | NM_002460        | c.C282T        | p.T281M           | 6          | 401520    | 401520 C                       |     | T   | 228   | 0.031                    | Training | Haem_ATL_4  |
| HLA-B   | non-synonymous SNV   | NM_005514        | c.C63_65del    | p.L228_229del     | 6          | 31232304  | 31232306 CCC                   |     | A   | 102   | 0.225                    | Training | Haem_ATL_4  |
| FTN     | non-synonymous SNV   | NM_002037        | c.C287T        | p.R96L            | 6          | 112035607 | 112035607 C                    |     | A   | 219   | 0.132                    | Training | Haem_ATL_4  |
| CARD11  | non-synonymous SNV   | NM_032415        | c.T270S        | p.F902C           | 7          | 2955005   | 2955005 A                      |     | C   | 217   | 0.12                     | Training | Haem_ATL_4  |
| GATA3   | frameshift deletion  | NM_002051        | c.S654delC     | p.P189b           | 10         | 8100591   | 8100591 C                      |     | A   | 384   | 0.122                    | Training | Haem_ATL_4  |
| PLCG1   | non-synonymous SNV   | NM_002660        | c.C142T        | p.R48W            | 20         | 39766423  | 39766423 C                     |     | T   | 102   | 0.157                    | Training | Haem_ATL_4  |
| CCRA    | stopgain             | NM_005508        | c.C993G        | p.Y331X           | 3          | 32995907  | 32995907 C                     |     | G   | 131   | 0.382                    | Training | Haem_ATL_5  |
| TBL1XR1 | non-synonymous SNV   | NM_024665        | c.T562C        | p.S188P           | 3          | 176767925 | 176767925 A                    |     | G   | 57    | 0.877                    | Training | Haem_ATL_5  |
| CARD11  | non-synonymous SNV   | NM_032415        | c.T1864C       | p.S622P           | 7          | 2963943   | 2963943 A                      |     | C   | 179   | 0.168                    | Training | Haem_ATL_5  |
| CARD11  | non-synonymous SNV   | NM_032415        | c.C1246A       | p.E416K           | 7          | 2976766   | 2976766 C                      |     | T   | 152   | 0.066                    | Training | Haem_ATL_5  |
| CARD11  | non-synonymous SNV   | NM_032415        | c.G1130A       | p.R377Q           | 7          | 2973754   | 2973754 C                      |     | T   | 77    | 0.241                    | Training | Haem_ATL_5  |
| TP53    | non-synonymous SNV   | NM_000546        | c.G524A        | p.R175H           | 17         | 7578406   | 7578406 C                      |     | T   | 55    | 0.727                    | Training | Haem_ATL_5  |
| CCR7    | frameshift deletion  | NM_001838        | c.1072_1084del | p.C358b           | 17         | 38711047  | 38711059 GGATGGCCGACCA         |     | -   | 128   | 0.164                    | Training | Haem_ATL_5  |
| EP300   | frameshift deletion  | NM_001429        | c.T244_245del  | p.S241Sb          | 22         | 41574959  | 41574960 AG                    |     | -   | 68    | 0.15                     | Training | Haem_ATL_5  |
| CCRA    | frameshift insertion | NM_005508        | c.968dupG      | p.R323f           | 3          | 32995881  | 32995881 -                     |     | G   | 408   | 0.527                    | Training | Haem_ATL_6  |
| HLA-B   | stopgain             | NM_005514        | c.C535T        | p.Q179X           | 6          | 31324028  | 31324028 G                     |     | A   | 69    | 0.203                    | Training | Haem_ATL_6  |
| CARD11  | non-synonymous SNV   | NM_032415        | c.G2719A       | p.E907K           | 7          | 2954991   | 2954991 C                      |     | T   | 221   | 0.032                    | Training | Haem_ATL_6  |
| GATA3   | stopgain             | NM_002051        | c.C532T        | p.Q178X           | 10         | 8100558   | 8100558 C                      |     | T   | 160   | 0.625                    | Training | Haem_ATL_6  |
| TP53    | non-synonymous SNV   | NM_000546        | c.T821C        | p.V274A           | 17         | 7577117   | 7577117 A                      |     | G   | 79    | 0.466                    | Training | Haem_ATL_6  |
| CCRA    | stopgain             | NM_005508        | c.C106T        | p.Q36X            | 3          | 32995920  | 32995920 C                     |     | T   | 223   | 0.247                    | Training | Haem_ATL_7  |
| RHOA    | non-synonymous SNV   | NM_001664        | c.T86C         | p.K49I            | 3          | 49412977  | 49412977 A                     |     | G   | 166   | 0.241                    | Training | Haem_ATL_7  |
| ATXN1   | stopgain             | NM_000332        | c.C199PT       | p.Q667X           | 6          | 16307009  | 16307009 G                     |     | A   | 124   | 0.621                    | Training | Haem_ATL_7  |
| HLA-B   | stopgain             | NM_005514        | c.G573A        | p.W191X           | 6          | 31323990  | 31323990 C                     |     | T   | 64    | 0.312                    | Training | Haem_ATL_7  |
| CARD11  | non-synonymous SNV   | NM_032415        | c.C1299G       | p.S433R           | 7          | 2976713   | 2976713 G                      |     | C   | 126   | 0.143                    | Training | Haem_ATL_7  |
| PRKCB   | non-synonymous SNV   | NM_002738        | c.G1279A       | p.D427N           | 16         | 24183630  | 24183630 G                     |     | A   | 176   | 0.254                    | Training | Haem_ATL_7  |
| TP53    | non-synonymous SNV   | NM_000546        | c.G746A        | p.R249K           | 17         | 7575535   | 7575535 C                      |     | T   | 193   | 0.243                    | Training | Haem_ATL_7  |
| CCRA    | stopgain             | NM_005508        | c.C987A        | p.C329X           | 3          | 32995901  | 32995901 C                     |     | A   | 173   | 0.383                    | Training | Haem_ATL_8  |
| FTN     | non-synonymous SNV   | NM_002037        | c.G964+2T>G    | NA                | 6          | 112035607 | 112035607 C                    |     | A   | 106   | 0.047                    | Training | Haem_ATL_8  |
| NOTCH1  | non-synonymous SNV   | NM_017617        | c.C735T        | p.P252L           | 9          | 139390856 | 139390856 G                    |     | A   | 120   | 0.040                    | Training | Haem_ATL_8  |
| YAV1    | non-synonymous SNV   | NM_005428        | c.A524T        | p.E237H           | 19         | 6822306   | 6822306 A                      |     | G   | 100   | 0.318                    | Training | Haem_ATL_8  |
| YAV1    | non-synonymous SNV   | NM_005428        | c.A1211G       | p.K404R           | 19         | 6828857   | 6828857 A                      |     | G   | 144   | 0.375                    | Training | Haem_ATL_8  |
| CD28    | non-synonymous SNV   | NM_006139        | c.C372G        | p.D124E           | 2          | 204591675 | 204591675 C                    |     | G   | 148   | 0.685                    | Training | Haem_ATL_9  |
| CCRA    | stopgain             | NM_005508        | c.C993A        | p.Y331X           | 3          | 32995907  | 32995907 C                     |     | A   | 751   | 0.364                    | Training | Haem_ATL_9  |
| FTN     | non-synonymous SNV   | NM_002037        | c.A1337C       | p.K446T           | 6          | 111995770 | 111995770 T                    |     | G   | 950   | 0.703                    | Training | Haem_ATL_9  |
| RELA    | non-synonymous SNV   | NM_021975        | c.G115C        | p.E39Q            | 11         | 65429479  | 65429479 C                     |     | G   | 407   | 0.314                    | Training | Haem_ATL_9  |
| ZFP362  | non-synonymous SNV   | NM_006887        | c.G176A        | p.S59N            | 2          | 43452767  | 43452767 C                     |     | T   | 148   | 0.264                    | Training | Haem_ATL_10 |
| CLB     | non-synonymous SNV   | NM_001321790     | c.G4A          | p.A2T             | 3          | 105588229 | 105588229 C                    |     | T   | 403   | 0.3                      | Training | Haem_ATL_10 |
| ATXN1   | non-synonymous SNV   | NM_000332        | c.C990A        | p.R303Q           | 6          | 16327634  | 16327634 C                     |     | T   | 183   | 0.399                    | Training | Haem_ATL_10 |
| HLA-B   | stopgain             | NM_005514        | c.C796T        | p.G360X           | 6          | 31323193  | 31323193 A                     |     | A   | 244   | 0.217                    | Training | Haem_ATL_10 |
| NOTCH1  | frameshift deletion  | NM_017617        | c.T210delC     | p.Q210del         | 9          | 139390981 | 139390981 G                    |     | A   | 100   | 0.261                    | Training | Haem_ATL_10 |
| TP53    | non-synonymous SNV   | NM_000546        | c.A773G        | p.E258G           | 17         | 7577508   | 7577508 T                      |     | C   | 177   | 0.791                    | Training | Haem_ATL_10 |
| STAT3   | non-synonymous SNV   | NM_003150        | c.G2063A       | p.R688Q           | 17         | 40474338  | 40474338 C                     |     | T   | 227   | 0.167                    | Training | Haem_ATL_10 |
| EP300   | stopgain             | NM_001429        | c.C2554T       | p.Q852X           | 22         | 41545939  | 41545939 C                     |     | T   | 249   | 0.357                    | Training | Haem_ATL_10 |
| IFI4BP2 | non-synonymous SNV   | NM_182972        | c.G581T        | p.G194V           | 1          | 23474460  | 23474460 C                     |     | A   | 88    | 0.216                    | Training | Haem_ATL_11 |
| CCRA    | stopgain             | NM_005508        | c.C993G        | p.Y331X           | 3          | 32995907  | 32995907 C                     |     | A   | 387   | 0.807                    | Training | Haem_ATL_11 |
| RHOA    | non-synonymous SNV   | NM_001664        | c.G481A        | p.A161T           | 3          | 49397743  | 49397743 C                     |     | T   | 247   | 0.656                    | Training | Haem_ATL_11 |
| TBL1XR1 | non-synonymous SNV   | NM_024665        | c.G1502A       | p.S501N           | 3          | 176744177 | 176744177 C                    |     | T   | 258   | 0.151                    | Training | Haem_ATL_11 |
| IFI4    | non-synonymous SNV   | NM_002460        | c.A176G        | p.K9R             | 6          | 393328    | 393328 A                       |     | G   | 203   | 0.611                    | Training | Haem_ATL_11 |
| BCM     | non-synonymous SNV   | NM_004048        | c.T2A          | p.A5007I46        | 15         | 45007346  | 45007346 A                     |     | A   | 249   | 0.816                    | Training | Haem_ATL_11 |
| PRKCB   | non-synonymous SNV   | NM_002738        | c.C80T         | p.R27L            | 16         | 23487576  | 23487576 G                     |     | T   | 139   | 0.245                    | Training | Haem_ATL_11 |
| PLCG1   | non-synonymous SNV   | NM_002660        | c.C202_222del  | p.T74_741del      | 20         | 39795400  | 39795420 TTGGTCACTCAAGTACTA    |     | -   | 310   | 0.139                    | Training | Haem_ATL_11 |
| RHOA    | non-synonymous SNV   | NM_001664        | c.G50T         | p.G17V            | 3          | 49412973  | 49412973 C                     |     | A   | 202   | 0.05                     | Training | Haem_ATL_12 |
| CARD11  | non-synonymous SNV   | NM_032415        | c.G1876A       | p.E626K           | 7          | 2963931   | 2963931 C                      |     | A   | 190   | 0.221                    | Training | Haem_ATL_12 |
| TP53    | non-synonymous SNV   | NM_000546        | c.T33_73del    | p.S45_245del      | 17         | 7575546   | 7575548 GCC                    |     | -   | 279   | 0.308                    | Training | Haem_ATL_12 |
| CCRA    | stopgain             | NM_005508        | c.C993A        | p.Y331X           | 3          | 32995907  | 32995907 C                     |     | A   | 452   | 0.062                    | Training | Haem_ATL_13 |
| FTN     | non-synonymous SNV   | NM_002037        | c.T1591C       | p.Y531H           | 6          | 111982965 | 111982965 A                    |     | C   | 313   | 0.073                    | Training | Haem_ATL_13 |
| STAT3   | non-synonymous SNV   | NM_003150        | c.A1919T       | p.Y640E           | 17         | 40474482  | 40474482 T                     |     | A   | 434   | 0.055                    | Training | Haem_ATL_13 |
| CCRA    | stopgain             | NM_005508        | c.C993A        | p.Y331X           | 3          | 32995907  | 32995907 C                     |     | A   | 1048  | 0.23                     | Training | Haem_ATL_15 |
| CLB     | non-synonymous SNV   | NM_17062         | c.C1298T       | p.S90L            | 3          | 10559990  | 10559990 G                     |     | A   | 297   | 0.279                    | Training | Haem_ATL_15 |
| STAT3   | non-synonymous SNV   | NM_003150        | c.C1981T       | p.D661Y           | 17         | 40474420  | 40474420 C                     |     | A   | 995   | 0.487                    | Training | Haem_ATL_15 |
| YAV1    | non-synonymous SNV   | NM_005428        | c.C1666A       | p.E556K           | 19         | 6833594   | 6833594 G                      |     | A   | 653   | 0.358                    | Training | Haem_ATL_15 |
| PLCG1   | non-synonymous SNV   | NM_002660        | c.C142T        | p.R48W            | 20         | 39766423  | 39766423 C                     |     | T   | 885   | 0.288                    | Training | Haem_ATL_15 |
| RHOA    | non-synonymous SNV   | NM_001664        | c.T46C         | p.C16R            | 3          | 49412977  | 49412977 A                     |     | G   | 262   | 0.336                    | Training | Haem_ATL_16 |
| TBL1XR1 | non-synonymous SNV   | NM_024665        | c.C1256T       | p.S419F           | 3          | 176750919 | 176750919 G                    |     | A   | 196   | 0.826                    | Training | Haem_ATL_16 |
| TET2    | frameshift deletion  | NM_017628        | c.1315_1319del | p.N439b           | 4          | 106156414 | 106156418 AACCA                |     | -   | 270   | 0.322                    | Training | Haem_ATL_16 |
| TET2    | stopgain             | NM_001127208     | c.4011delT     | p.Y1337X          | 4          | 106182972 | 106182972 T                    |     | -   | 203   | 0.498                    | Training | Haem_ATL_16 |
| IFI4    | non-synonymous SNV   | NM_002460        | c.C208G        | p.L70V            | 6          | 393360    | 393360 C                       |     | A   | 121   | 0.645                    | Training | Haem_ATL_16 |
| FTN     | non-synonymous SNV   | NM_002037        | c.C1564T       | p.R622Y           | 6          | 111982992 | 111982992 C                    |     | G   | 193   | 0.031                    | Training | Haem_ATL_16 |
| FTN     | non-synonymous SNV   | NM_002037        | c.C247G        | p.T132E           | 6          | 112035237 | 112035238 G                    |     | A   | 213   | 0.164                    | Training | Haem_ATL_16 |
| CARD11  | non-synonymous SNV   | NM_032415        | c.C270S        | p.F902C           | 7          | 2955005   | 2955005 A                      |     | C   | 202   | 0.401                    | Training | Haem_ATL_16 |
| B2M     | frameshift deletion  | NM_004048        | c.390delA      | p.E67b            | 15         | 45007753  | 45007753 A                     |     | -   | 161   | 0.18                     | Training | Haem_ATL_16 |
| STAT3   | non-synonymous SNV   | NM_003150        | c.A1973G       | p.K658R           | 17         | 40474428  | 40474428 T                     |     | C   | 247   | 0.425                    | Training | Haem_ATL_16 |
| PLCG1   | non-synonymous SNV   | NM_002660        | c.C1034T       | p.S345F           | 20         | 39792584  | 39792584 C                     |     | T   | 262   | 0.37                     | Training | Haem_ATL_16 |
| CNSX1A1 | non-synonymous SNV   | NM_001892        | c.C406A        | p.D136N           | 5          | 148899903 | 148899903 C                    |     |     |       |                          |          |             |

Supplemental Table 2. Somatic mutations detected by targeted capture sequencing in 183 ATL cases

| Gene      | Type of mutation        | Accession number | Base change          | Amino acid change | Chromosome | Start     | End       | Ref                          | Alt    | Depth | Variant allele frequency | Cohort   | Case ID     |
|-----------|-------------------------|------------------|----------------------|-------------------|------------|-----------|-----------|------------------------------|--------|-------|--------------------------|----------|-------------|
| NOTCH1    | nononymous SNV          | NM_017617        | c.A1718C             | p.D573A           | 9          | 139410120 | 139410120 | T                            | G      | 188   | 0.043                    | Training | Haem_ATL_25 |
| GATA3     | stopgain                | NM_002051        | c.C189G              | p.Y63X            | 10         | 8997807   | 8997807   | C                            | G      | 90    | 0.159                    | Training | Haem_ATL_25 |
| CCR7      | stopgain                | NM_001838        | c.G1048T             | p.E350X           | 17         | 38711083  | 38711083  | C                            | G      | 921   | 0.162                    | Training | Haem_ATL_25 |
| YAV1      | nononymous SNV          | NM_005428        | c.G1668C             | p.E556D           | 19         | 6833596   | 6833596   | G                            | C      | 673   | 0.312                    | Training | Haem_ATL_25 |
| PLCG1     | nononymous SNV          | NM_002660        | c.C1034T             | p.S345F           | 20         | 39792584  | 39792584  | C                            | T      | 951   | 0.132                    | Training | Haem_ATL_25 |
| CCRA      | stopgain                | NM_005508        | c.C993A              | p.Y331X           | 3          | 32995907  | 32995907  | C                            | A      | 2280  | 0.341                    | Training | Haem_ATL_26 |
| CLRD11    | nonframeshift deletion  | NM_032415        | c.1846_1860del       | p.R616_620del     | 7          | 2963947   | 2963961   | GGAGGAGGAGTGGAT              | -      | 1752  | 0.112                    | Training | Haem_ATL_26 |
| CLRD11    | nononymous SNV          | NM_032415        | c.G1405A             | p.R405G           | 7          | 2974201   | 2974201   | C                            | G      | 1480  | 0.205                    | Training | Haem_ATL_26 |
| CLRD11    | nononymous SNV          | NM_032415        | c.C1071A             | p.D107E           | 7          | 2977613   | 2977613   | G                            | T      | 1622  | 0.172                    | Training | Haem_ATL_26 |
| FAS       | stopgain                | NM_000043        | c.T971G              | p.L224X           | 10         | 90773119  | 90773119  | T                            | T      | 917   | 0.256                    | Training | Haem_ATL_26 |
| CCR7      | frameshift deletion     | NM_001838        | c.1051_1054del       | p.Q351A           | 17         | 38711077  | 38711080  | GCTG                         | -      | 2027  | 0.146                    | Training | Haem_ATL_26 |
| EP300     | stopgain                | NM_001429        | c.C256T              | p.R86X            | 22         | 41513352  | 41513352  | C                            | T      | 1829  | 0.217                    | Training | Haem_ATL_26 |
| RHOA      | nononymous SNV          | NM_001664        | c.G248A              | p.C83Y            | 3          | 4905890   | 4905890   | C                            | C      | 1989  | 0.049                    | Training | Haem_ATL_27 |
| CLRD11    | nononymous SNV          | NM_032415        | c.G2203A             | p.E735K           | 7          | 2962334   | 2962334   | C                            | T      | 1503  | 0.058                    | Training | Haem_ATL_27 |
| FAS       | nononymous SNV          | NM_000043        | c.T5A                | p.L2Q             | 10         | 90750638  | 90750638  | C                            | A      | 1566  | 0.059                    | Training | Haem_ATL_27 |
| PRKCB     | nononymous SNV          | NM_002738        | c.G1279A             | p.D427N           | 16         | 24183630  | 24183630  | G                            | A      | 1663  | 0.025                    | Training | Haem_ATL_27 |
| PRKCB     | nononymous SNV          | NM_002738        | c.G1636A             | p.E546K           | 16         | 24196802  | 24196802  | G                            | A      | 1925  | 0.056                    | Training | Haem_ATL_27 |
| PLCG1     | nononymous SNV          | NM_002660        | c.A359C              | p.E135D           | 20         | 39802556  | 39802556  | A                            | C      | 1033  | 0.252                    | Training | Haem_ATL_29 |
| PLCG1     | nonframeshift deletion  | NM_002660        | c.3482_3499del       | p.L161_1167del    | 20         | 39802729  | 39802736  | TGTATGAGGAGAACATGT           | -      | 1211  | 0.135                    | Training | Haem_ATL_29 |
| PLCG1     | nonframeshift deletion  | NM_002660        | c.3599_3511del       | p.L170_1171del    | 20         | 39802406  | 39802408  | AGA                          | -      | 1091  | 0.093                    | Training | Haem_ATL_29 |
| CCRA      | stopgain                | NM_005508        | c.C993A              | p.Y331X           | 3          | 32995907  | 32995907  | C                            | A      | 847   | 0.47                     | Training | Haem_ATL_30 |
| TET2      | stopgain                | NM_001127208     | c.G3955T             | p.E1319X          | 4          | 106182916 | 106182916 | G                            | T      | 419   | 0.957                    | Training | Haem_ATL_30 |
| CSNK1A1   | nononymous SNV          | NM_001892        | c.G480C              | p.L160F           | 5          | 148892749 | 148892749 | C                            | C      | 450   | 0.916                    | Training | Haem_ATL_30 |
| PRKCB     | nononymous SNV          | NM_002738        | c.G163C              | p.D581H           | 16         | 23847659  | 23847659  | G                            | T      | 727   | 0.285                    | Training | Haem_ATL_30 |
| PRKCB     | nononymous SNV          | NM_002738        | c.G1279A             | p.D427N           | 16         | 24183630  | 24183630  | G                            | A      | 598   | 0.048                    | Training | Haem_ATL_30 |
| YAV1      | nononymous SNV          | NM_005428        | c.G1668C             | p.E556D           | 19         | 6833596   | 6833596   | G                            | C      | 578   | 0.928                    | Training | Haem_ATL_30 |
| IRF2BP2   | nononymous SNV          | NM_182972        | c.C943T              | p.H131Y           | 1          | 23474298  | 23474298  | G                            | A      | 51    | 0.294                    | Training | Haem_ATL_31 |
| CCRA      | nononymous SNV          | NM_005508        | c.C98A               | p.R39R            | 3          | 32995912  | 32995912  | G                            | C      | 57    | 0.033                    | Training | Haem_ATL_31 |
| CLBL      | nononymous SNV          | NM_170662        | c.C1208T             | p.S801L           | 3          | 105439090 | 105439090 | G                            | A      | 42    | 0.095                    | Training | Haem_ATL_31 |
| IRF4      | nononymous SNV          | NM_002460        | c.C166T              | p.H54Y            | 6          | 3933318   | 3933318   | C                            | T      | 63    | 0.175                    | Training | Haem_ATL_31 |
| IRF4      | nononymous SNV          | NM_002460        | c.C342A              | p.S114R           | 6          | 394946    | 394946    | C                            | A      | 115   | 0.2                      | Training | Haem_ATL_31 |
| NOTCH1    | stopgain                | NM_017617        | c.C7507T             | p.Q2503X          | 9          | 139390684 | 139390684 | G                            | G      | 66    | 0.242                    | Training | Haem_ATL_31 |
| GATA3     | stopgain                | NM_002051        | c.C189G              | p.Y63X            | 10         | 8997807   | 8997807   | C                            | G      | 107   | 0.065                    | Training | Haem_ATL_31 |
| RELA      | stopgain                | NM_021975        | c.C985T              | p.R329X           | 11         | 65422307  | 65422307  | C                            | T      | 157   | 0.032                    | Training | Haem_ATL_31 |
| CCR7      | stopgain                | NM_001838        | c.G1065A             | p.W355X           | 17         | 38711066  | 38711066  | C                            | G      | 98    | 0.153                    | Training | Haem_ATL_31 |
| CSNK2A1   | splicing                | NM_001895        | c.824-2T>C           | NA                | 20         | 469320    | 469320    | A                            | G      | 38    | 0.263                    | Training | Haem_ATL_31 |
| CD58      | splicing                | NM_001779        | c.628-2T>C           | NA                | 1          | 117078585 | 117078585 | A                            | G      | 196   | 0.878                    | Training | Haem_ATL_31 |
| IRF4      | nononymous SNV          | NM_002460        | c.A176G              | p.K59R            | 6          | 393328    | 393328    | A                            | G      | 454   | 0.042                    | Training | Haem_ATL_31 |
| HVRNP42B1 | nonframeshift insertion | NM_002137        | c.905_906insCTACCG   | p.G302delinsGVG   | 7          | 26232929  | 26232929  | -                            | CCGTAG | 1075  | 0.312                    | Training | Haem_ATL_31 |
| PRKCB     | nononymous SNV          | NM_002738        | c.G1279A             | p.D427N           | 16         | 24183630  | 24183630  | G                            | A      | 621   | 0.496                    | Training | Haem_ATL_31 |
| IRF2BP2   | frameshift insertion    | NM_182972        | c.1627_1628insGGAG   | p.A543b           | 1          | 234743019 | 234743019 | -                            | CTCC   | 395   | 0.289                    | Training | Haem_ATL_32 |
| IRF4      | nononymous SNV          | NM_002460        | c.A176G              | p.K59R            | 6          | 393328    | 393328    | A                            | G      | 179   | 0.352                    | Training | Haem_ATL_32 |
| IKKB      | nononymous SNV          | NM_001556        | c.G607A              | p.V203I           | 8          | 42166458  | 42166458  | G                            | C      | 238   | 0.311                    | Training | Haem_ATL_32 |
| NOTCH1    | nononymous SNV          | NM_017617        | c.G5161A             | p.V1721M          | 9          | 139397640 | 139397640 | C                            | T      | 258   | 0.357                    | Training | Haem_ATL_32 |
| GFRI3     | frameshift deletion     | NM_004951        | c.748_751del         | p.I250b           | 13         | 99947649  | 99947652  | CAAT                         | -      | 223   | 0.223                    | Training | Haem_ATL_32 |
| NFKB1A    | frameshift deletion     | NM_020529        | c.131_159del         | p.Q446            | 14         | 35873692  | 35873720  | CGGATCTCTCTGGACCTTCCTGACCTCT | -      | 519   | 0.183                    | Training | Haem_ATL_32 |
| CCR7      | stopgain                | NM_001838        | c.C1051T             | p.Q951X           | 17         | 38711080  | 38711080  | G                            | A      | 209   | 0.523                    | Training | Haem_ATL_32 |
| YAV1      | nononymous SNV          | NM_005428        | c.G2393C             | p.R798P           | 19         | 6854018   | 6854018   | G                            | C      | 223   | 0.275                    | Training | Haem_ATL_32 |
| PLCG1     | nononymous SNV          | NM_002660        | c.C3487A             | p.E1163K          | 20         | 39802384  | 39802384  | G                            | A      | 293   | 0.311                    | Training | Haem_ATL_32 |
| NOTCH1    | frameshift deletion     | NM_017617        | c.6427_6436del       | p.N2143b          | 9          | 139391755 | 139391764 | GGTAGCCCTT                   | -      | 871   | 0.392                    | Training | Haem_ATL_32 |
| GATA3     | splicing                | NM_002051        | c.241-1G>C           | NA                | 10         | 8997860   | 8997860   | G                            | C      | 686   | 0.42                     | Training | Haem_ATL_32 |
| PRKCB     | nononymous SNV          | NM_002738        | c.A1637T             | p.E546V           | 16         | 24196803  | 24196803  | A                            | G      | 570   | 0.133                    | Training | Haem_ATL_32 |
| ZNF838    | nononymous SNV          | NM_014497        | c.A508G              | p.M170V           | 2          | 7176592   | 7176592   | A                            | G      | 40    | 0.292                    | Training | Haem_ATL_33 |
| TBL1XR1   | nononymous SNV          | NM_024665        | c.A1388T             | p.D463V           | 3          | 176750787 | 176750787 | T                            | A      | 365   | 0.236                    | Training | Haem_ATL_33 |
| IRF4      | nononymous SNV          | NM_002460        | c.A176G              | p.K59R            | 6          | 393328    | 393328    | A                            | G      | 197   | 0.284                    | Training | Haem_ATL_33 |
| HVRNP42B1 | nononymous SNV          | NM_002137        | c.G0964A             | p.G323R           | 7          | 26232871  | 26232871  | C                            | T      | 312   | 0.24                     | Training | Haem_ATL_33 |
| PRKCB     | nononymous SNV          | NM_002738        | c.G1279A             | p.D427N           | 16         | 24183630  | 24183630  | G                            | A      | 136   | 0.116                    | Training | Haem_ATL_33 |
| CCR7      | stopgain                | NM_001838        | c.C1051T             | p.Q951X           | 17         | 38711080  | 38711080  | G                            | A      | 287   | 0.278                    | Training | Haem_ATL_33 |
| STAT3     | nononymous SNV          | NM_003150        | c.A1973G             | p.K658R           | 17         | 40474428  | 40474428  | T                            | G      | 380   | 0.218                    | Training | Haem_ATL_33 |
| YAV1      | nononymous SNV          | NM_005428        | c.G2393C             | p.R798P           | 19         | 6854018   | 6854018   | G                            | C      | 321   | 0.262                    | Training | Haem_ATL_33 |
| CCRA      | frameshift insertion    | NM_005508        | c.967dupA            | p.C322b           | 3          | 32995880  | 32995880  | -                            | A      | 598   | 0.273                    | Training | Haem_ATL_34 |
| CSNK1A1   | nononymous SNV          | NM_001892        | c.A1000G             | p.M334V           | 5          | 14885016  | 14885016  | T                            | C      | 378   | 0.318                    | Training | Haem_ATL_34 |
| IRF4      | nononymous SNV          | NM_002460        | c.A176G              | p.K59R            | 6          | 393328    | 393328    | A                            | G      | 259   | 0.054                    | Training | Haem_ATL_34 |
| TNFAIP3   | frameshift insertion    | NM_006290        | c.318dupT            | p.H1066b          | 6          | 138196003 | 138196003 | -                            | C      | 387   | 0.178                    | Training | Haem_ATL_34 |
| CLRD11    | nononymous SNV          | NM_032415        | c.T36C               | p.S116P           | 7          | 2985465   | 2985465   | A                            | G      | 408   | 0.305                    | Training | Haem_ATL_34 |
| PRKCB     | nononymous SNV          | NM_002738        | c.C1279A             | p.D427N           | 16         | 24183630  | 24183630  | G                            | A      | 378   | 0.469                    | Training | Haem_ATL_34 |
| PLCG1     | nononymous SNV          | NM_002660        | c.C2258A             | p.R753H           | 20         | 39795456  | 39795456  | A                            | T      | 656   | 0.27                     | Training | Haem_ATL_34 |
| PLCG1     | nononymous SNV          | NM_002660        | c.C142T              | p.R753H           | 20         | 39795456  | 39795456  | G                            | T      | 413   | 0.177                    | Training | Haem_ATL_34 |
| CD58      | nononymous SNV          | NM_001779        | c.T419A              | p.V140D           | 1          | 117078796 | 117078796 | A                            | G      | 732   | 0.253                    | Training | Haem_ATL_35 |
| IRF4      | nononymous SNV          | NM_002460        | c.A176G              | p.K59R            | 6          | 393328    | 393328    | A                            | G      | 487   | 0.31                     | Training | Haem_ATL_35 |
| NOTCH1    | stopgain                | NM_017617        | c.C7307T             | p.Q2444X          | 9          | 139390861 | 139390861 | G                            | C      | 583   | 0.151                    | Training | Haem_ATL_35 |
| PRKCB     | nononymous SNV          | NM_002738        | c.G1279A             | p.D427N           | 16         | 24183630  | 24183630  | G                            | A      | 834   | 0.044                    | Training | Haem_ATL_35 |
| PRKCB     | nononymous SNV          | NM_002738        | c.A1889G             | p.D630G           | 16         | 24226004  | 24226004  | A                            | G      | 1206  | 0.105                    | Training | Haem_ATL_35 |
| CCR7      | stopgain                | NM_001838        | c.C1045T             | p.Q349X           | 17         | 38711086  | 38711086  | G                            | A      | 103   | 0.193                    | Training | Haem_ATL_35 |
| TBL1XR1   | nononymous SNV          | NM_024665        | c.C919G              | p.H307D           | 3          | 176763923 | 176763923 | G                            | C      | 517   | 0.217                    | Training | Haem_ATL_36 |
| IRF4      | nononymous SNV          | NM_002460        | c.C138A              | p.D120N           | 6          | 394962    | 394962    | G                            | A      | 790   | 0.265                    | Training | Haem_ATL_36 |
| TP53      | nononymous SNV          | NM_000546        | c.C837T              | p.S44E            | 17         | 8577121   | 8577121   | A                            | G      | 726   | 0.146                    | Training | Haem_ATL_36 |
| PLCG1     | nononymous SNV          | NM_002660        | c.C142T              | p.R48W            | 20         | 39766423  | 39766423  | C                            | T      | 584   | 0.125                    | Training | Haem_ATL_36 |
| CCRA      | stopgain                | NM_005508        | c.C1034A             | p.S345X           | 3          | 32995948  | 32995948  | C                            | A      | 938   | 0.281                    | Training | Haem_ATL_37 |
| CLBL      | nononymous SNV          | NM_170662        | c.G38A               | p.R13Q            | 3          | 105586384 | 105586384 | C                            | G      | 724   | 0.24                     | Training | Haem_ATL_37 |
| HVRNP42B1 | splicing                | NM_002137        | c.964-1G>A           | NA                | 7          | 26232870  | 26232870  | C                            | T      | 819   | 0.253                    | Training | Haem_ATL_37 |
| TP53      | stopgain                | NM_000546        | c.G437A              | p.W146X           | 17         | 7578493   | 7578493   | C                            | G      | 536   | 0.36                     | Training | Haem_ATL_37 |
| STAT3     | nononymous SNV          | NM_003150        | c.G1981T             | p.D611Y           | 17         | 40474420  | 40474420  | C                            | T      | 932   | 0.244                    | Training | Haem_ATL_37 |
| CSNK1A1   | nonframeshift deletion  | NM_001892        | c.334_339del         | p.L12_113del      | 5          | 148904626 | 148904631 | TACAGT                       | -      | 1978  | 0.28                     | Training | Haem_ATL_38 |
| CSNK1A1   | nononymous SNV          | NM_001892        | c.C80G               | p.S27C            | 5          | 148930448 | 148930448 | G                            | C      | 1080  | 0.3                      | Training | Haem_ATL_38 |
| TP53      | nononymous SNV          | NM_000546        | c.C735A              | p.G248E           | 17         | 7577548   | 7577548   | C                            | T      | 823   | 0.122                    | Training | Haem_ATL_38 |
| CCR7      | stopgain                | NM_001838        | c.C1045T             | p.Q949X           | 17         | 38711086  | 38711086  | G                            | A      | 1098  | 0.067                    | Training | Haem_ATL_38 |
| STAT3     | nonframeshift deletion  | NM_003150        | c.1847_1849del       | p.R616_617del     | 17         | 40475061  | 40475063  | CTT                          | -      | 1189  | 0.292                    | Training | Haem_ATL_38 |
| STAT3     | nononymous SNV          | NM_003150        | c.A1847G             | p.E416G           | 17         | 40475063  | 40475063  | T                            | G      | 689   | 0.045                    | Training | Haem_ATL_38 |
| YAV1      | frameshift deletion     | NM_005428        | c.2305_2320del       | p.E709b           | 19         | 6853063   | 6853078   | GAAAGAGGAAACATCA             | -      | 1226  | 0.139                    | Training | Haem_ATL_38 |
| YAV1      | stopgain                | NM_005428        | c.2324_2325insGTAGGA | p.R775del         |            |           |           |                              |        |       |                          |          |             |

Supplemental Table 2. Somatic mutations detected by targeted capture sequencing in 183 ATL cases

| Gene           | Type of mutation        | Accession number | Base change     | Amino acid change | Chromosome | Start     | End       | Ref                | Alt | Depth  | Variant allele frequency | Cohort   | Case ID     |
|----------------|-------------------------|------------------|-----------------|-------------------|------------|-----------|-----------|--------------------|-----|--------|--------------------------|----------|-------------|
| <i>PLCG1</i>   | nonframeshift deletion  | NM_002660        | c.484_3501del   | p.L162_1167del    | 20         | 39802381  | 39802398  | TATGAGGAGCATGTT    | -   | 1129   | 0.18                     | Training | Haem_ATL_44 |
| <i>PLCG1</i>   | nonframeshift deletion  | NM_002660        | c.3509_3511del  | p.L170_1171del    | 20         | 39802406  | 39802408  | AGA                | -   | 1139   | 0.065                    | Training | Haem_ATL_44 |
| <i>CD58</i>    | non synonymous SNV      | NM_001779        | c.C507G         | p.N169K           | 1          | 117078708 | 117078708 | G                  | C   | 939    | 0.103                    | Training | Haem_ATL_45 |
| <i>CCR4</i>    | stopgain                | NM_005508        | c.C993G         | p.Y331X           | 3          | 32995907  | 32995907  | C                  | G   | 1190   | 0.171                    | Training | Haem_ATL_45 |
| <i>IRF2BP2</i> | non synonymous SNV      | NM_182972        | c.G581A         | p.G194D           | 1          | 234744660 | 234744660 | G                  | T   | 118    | 0.458                    | Training | Haem_ATL_46 |
| <i>TP53</i>    | stopgain                | NM_000546        | c.C637T         | p.R213X           | 17         | 7578212   | 7578212   | G                  | A   | 559    | 0.767                    | Training | Haem_ATL_46 |
| <i>VAV1</i>    | non synonymous SNV      | NM_005428        | c.A350T         | p.M501L           | 19         | 6832204   | 6832204   | A                  | T   | 662    | 0.477                    | Training | Haem_ATL_46 |
| <i>ATXN1</i>   | non synonymous SNV      | NM_000314        | c.C130T         | p.Q95E            | 6          | 16328529  | 16328529  | G                  | C   | 553    | 0.260                    | Training | Haem_ATL_47 |
| <i>CARD11</i>  | non synonymous SNV      | NM_032415        | c.T1079A        | p.L360K           | 7          | 2977605   | 2977605   | T                  | C   | 1132   | 0.077                    | Training | Haem_ATL_47 |
| <i>CARD11</i>  | non synonymous SNV      | NM_032415        | c.A1078G        | p.M360V           | 7          | 2977606   | 2977606   | T                  | C   | 1321   | 0.32                     | Training | Haem_ATL_47 |
| <i>GATA3</i>   | stopgain                | NM_002051        | c.C559T         | p.Q187X           | 10         | 8100585   | 8100585   | C                  | T   | 1254   | 0.383                    | Training | Haem_ATL_47 |
| <i>PLCG1</i>   | non synonymous SNV      | NM_002660        | c.C142T         | p.R48W            | 20         | 39766423  | 39766423  | C                  | T   | 707    | 0.388                    | Training | Haem_ATL_47 |
| <i>PLCG1</i>   | non synonymous SNV      | NM_002660        | c.A1526G        | p.Y590C           | 20         | 39794106  | 39794106  | A                  | G   | 1226   | 0.301                    | Training | Haem_ATL_47 |
| <i>PLCG1</i>   | non synonymous SNV      | NM_002660        | c.G2606A        | p.G869E           | 20         | 39798122  | 39798122  | G                  | A   | 1148   | 0.075                    | Training | Haem_ATL_47 |
| <i>NOTCH1</i>  | stopgain                | NM_017617        | c.C7027T        | p.Q2343X          | 9          | 139391164 | 139391164 | G                  | A   | 245    | 0.278                    | Training | Haem_ATL_48 |
| <i>TP53</i>    | non synonymous SNV      | NM_000546        | c.G814A         | p.V272M           | 17         | 7577124   | 7577124   | C                  | A   | 933    | 0.933                    | Training | Haem_ATL_48 |
| <i>JAK3</i>    | non synonymous SNV      | NM_000215        | c.G1533A        | p.M511I           | 19         | 17949108  | 17949108  | C                  | T   | 242    | 0.404                    | Training | Haem_ATL_48 |
| <i>PLCG1</i>   | non synonymous SNV      | NM_002660        | c.C142T         | p.R48W            | 20         | 39766423  | 39766423  | C                  | T   | 567    | 0.323                    | Training | Haem_ATL_49 |
| <i>PLCG1</i>   | non synonymous SNV      | NM_002660        | c.L2602C        | p.L1868P          | 20         | 39798119  | 39798119  | T                  | C   | 1093   | 0.341                    | Training | Haem_ATL_49 |
| <i>PK3CD</i>   | splicing                | NM_005026        | c.1812-2A>G     | NA                | 1          | 9781500   | 9781500   | A                  | A   | 384    | 0.341                    | Training | Haem_ATL_50 |
| <i>IRF2BP2</i> | non synonymous SNV      | NM_182972        | c.C641T         | p.A214V           | 1          | 234744600 | 234744600 | G                  | A   | 148    | 0.061                    | Training | Haem_ATL_50 |
| <i>IRF2BP2</i> | non synonymous SNV      | NM_182972        | c.G294C         | p.Q98H            | 1          | 234744947 | 234744947 | C                  | T   | 171    | 0.181                    | Training | Haem_ATL_50 |
| <i>CCR4</i>    | stopgain                | NM_005508        | c.C987A         | p.C329X           | 3          | 32995901  | 32995901  | C                  | A   | 1528   | 0.258                    | Training | Haem_ATL_50 |
| <i>FTN</i>     | non synonymous SNV      | NM_002037        | c.A71G          | p.Q24R            | 6          | 112041184 | 112041184 | T                  | C   | 1009   | 0.232                    | Training | Haem_ATL_50 |
| <i>FAS</i>     | non synonymous SNV      | NM_000043        | c.T725C         | p.L242P           | 10         | 90773924  | 90773924  | T                  | C   | 1572   | 0.278                    | Training | Haem_ATL_50 |
| <i>VAV1</i>    | non synonymous SNV      | NM_005428        | c.G1668T        | p.E560D           | 19         | 6833596   | 6833596   | G                  | T   | 1021   | 0.524                    | Training | Haem_ATL_50 |
| <i>PLCG1</i>   | non synonymous SNV      | NM_002660        | c.C142T         | p.R48W            | 20         | 39766423  | 39766423  | C                  | T   | 552    | 0.277                    | Training | Haem_ATL_50 |
| <i>RHOA</i>    | non synonymous SNV      | NM_001664        | c.C284A         | p.C83Y            | 3          | 49055900  | 49055900  | C                  | A   | 990    | 0.211                    | Training | Haem_ATL_51 |
| <i>IF4</i>     | non synonymous SNV      | NM_002660        | c.G108A         | p.G34D            | 6          | 393256    | 393256    | A                  | G   | 990    | 0.341                    | Training | Haem_ATL_51 |
| <i>IF4</i>     | non synonymous SNV      | NM_002660        | c.A176G         | p.K59R            | 6          | 393328    | 393328    | A                  | G   | 1109   | 0.335                    | Training | Haem_ATL_51 |
| <i>FAS</i>     | non synonymous SNV      | NM_000043        | c.E816T         | p.E272D           | 10         | 90774015  | 90774015  | A                  | T   | 1114   | 0.373                    | Training | Haem_ATL_51 |
| <i>GP1B3</i>   | frameshift deletion     | NM_004951        | c.172_173del    | p.Q58E            | 13         | 99948227  | 99948228  | TG                 | -   | 964    | 0.507                    | Training | Haem_ATL_51 |
| <i>ZFP362</i>  | non synonymous SNV      | NM_006887        | c.C772G         | p.L258V           | 2          | 43452171  | 43452171  | G                  | C   | 114    | 0.325                    | Training | Haem_ATL_52 |
| <i>CCR4</i>    | frameshift insertion    | NM_005508        | c.997dupG       | p.C332E           | 3          | 32995910  | 32995910  | -                  | -   | 203    | 0.607                    | Training | Haem_ATL_52 |
| <i>RHOA</i>    | non synonymous SNV      | NM_001664        | c.T46C          | p.C16R            | 3          | 49412977  | 49412977  | A                  | G   | 295    | 0.138                    | Training | Haem_ATL_52 |
| <i>TBL1XR1</i> | non synonymous SNV      | NM_024665        | c.G974T         | p.C325P           | 3          | 176756174 | 176756174 | C                  | A   | 151    | 0.225                    | Training | Haem_ATL_52 |
| <i>PIK3CB</i>  | non synonymous SNV      | NM_010845        | c.C257C         | p.R86P            | 6          | 136408579 | 136408579 | G                  | C   | 118    | 0.305                    | Training | Haem_ATL_52 |
| <i>NOTCH1</i>  | stopgain                | NM_017617        | c.C7183T        | p.Q3910K          | 9          | 139391008 | 139391008 | G                  | A   | 162    | 0.241                    | Training | Haem_ATL_52 |
| <i>B2M</i>     | frameshift deletion     | NM_004048        | c.136_137del    | p.Y46E            | 4          | 45907689  | 45907690  | TA                 | -   | 183    | 0.206                    | Training | Haem_ATL_52 |
| <i>PRKCB</i>   | non synonymous SNV      | NM_002738        | c.G1279A        | p.D427N           | 16         | 24183630  | 24183630  | G                  | A   | 146    | 0.301                    | Training | Haem_ATL_52 |
| <i>CCR7</i>    | stopgain                | NM_001838        | c.G1065A        | p.W355X           | 17         | 38711066  | 38711066  | C                  | T   | 169    | 0.32                     | Training | Haem_ATL_52 |
| <i>STAT3</i>   | non synonymous SNV      | NM_003150        | c.A1982T        | p.D661V           | 17         | 40474419  | 40474419  | T                  | A   | 152    | 0.118                    | Training | Haem_ATL_52 |
| <i>STAT3</i>   | nonframeshift deletion  | NM_003150        | c.1847_1849del  | p.G16_617del      | 17         | 40475061  | 40475063  | CTT                | -   | 238    | 0.223                    | Training | Haem_ATL_52 |
| <i>STAT3</i>   | non synonymous SNV      | NM_003150        | c.A1847G        | p.E616G           | 17         | 40475063  | 40475063  | T                  | C   | 133    | 0.045                    | Training | Haem_ATL_52 |
| <i>VAV1</i>    | non synonymous SNV      | NM_005428        | c.G2389A        | p.D797N           | 19         | 6854014   | 6854014   | G                  | T   | 154    | 0.156                    | Training | Haem_ATL_52 |
| <i>VAV1</i>    | non synonymous SNV      | NM_005428        | c.A2443G        | p.K815E           | 19         | 6854068   | 6854068   | A                  | A   | 141    | 0.319                    | Training | Haem_ATL_52 |
| <i>PLCG1</i>   | non synonymous SNV      | NM_002660        | c.C142T         | p.R48W            | 20         | 39766423  | 39766423  | C                  | T   | 146    | 0.11                     | Training | Haem_ATL_52 |
| <i>FAS</i>     | non synonymous SNV      | NM_000043        | c.G778A         | p.D260N           | 10         | 90773977  | 90773977  | G                  | A   | 1717   | 0.083                    | Training | Haem_ATL_53 |
| <i>TBL1XR1</i> | non synonymous SNV      | NM_024665        | c.A820G         | p.R907R           | 3          | 176763922 | 176763922 | T                  | C   | 947    | 0.027                    | Training | Haem_ATL_54 |
| <i>TBL1XR1</i> | non synonymous SNV      | NM_024665        | c.T716C         | p.L239P           | 3          | 176765324 | 176765324 | A                  | G   | 1561   | 0.224                    | Training | Haem_ATL_55 |
| <i>IF4</i>     | non synonymous SNV      | NM_002660        | c.G390C         | p.K103N           | 6          | 394913    | 394913    | G                  | C   | 2189   | 0.244                    | Training | Haem_ATL_55 |
| <i>IF4</i>     | non synonymous SNV      | NM_002660        | c.G341A         | p.S114N           | 6          | 394945    | 394945    | A                  | A   | 1921   | 0.28                     | Training | Haem_ATL_55 |
| <i>IF4</i>     | non synonymous SNV      | NM_002660        | c.C342G         | p.S114R           | 6          | 394946    | 394946    | C                  | G   | 1938   | 0.276                    | Training | Haem_ATL_55 |
| <i>GATA3</i>   | nonframeshift insertion | NM_002051        | c.499_500insTGT | p.L1674delinsLL   | 10         | 8100523   | 8100525   | -                  | TGT | 2894   | 0.352                    | Training | Haem_ATL_55 |
| <i>STAT3</i>   | nonframeshift deletion  | NM_003150        | c.1847_1849del  | p.G16_617del      | 17         | 40475061  | 40475063  | CTT                | -   | 1946   | 0.18                     | Training | Haem_ATL_55 |
| <i>VAV1</i>    | non synonymous SNV      | NM_005428        | c.G2389A        | p.D797N           | 19         | 6854014   | 6854014   | G                  | A   | 1839   | 0.214                    | Training | Haem_ATL_55 |
| <i>GP1B3</i>   | stopgain                | NM_004951        | c.C297T         | p.R67X            | 13         | 99948141  | 99948141  | G                  | A   | 1964   | 0.181                    | Training | Haem_ATL_56 |
| <i>PRKCB</i>   | non synonymous SNV      | NM_002738        | c.G1279A        | p.D427N           | 16         | 24183630  | 24183630  | G                  | A   | 146    | 0.218                    | Training | Haem_ATL_56 |
| <i>STAT3</i>   | non synonymous SNV      | NM_003150        | c.C1852C        | p.G818R           | 17         | 40475058  | 40475058  | C                  | G   | 1479   | 0.222                    | Training | Haem_ATL_56 |
| <i>PLCG1</i>   | non synonymous SNV      | NM_002660        | c.C142T         | p.R48W            | 20         | 39766423  | 39766423  | C                  | T   | 906    | 0.239                    | Training | Haem_ATL_56 |
| <i>PLCG1</i>   | non synonymous SNV      | NM_002660        | c.A3506G        | p.D1169G          | 20         | 39802403  | 39802403  | A                  | G   | 2003   | 0.215                    | Training | Haem_ATL_56 |
| <i>IRF2BP2</i> | non synonymous SNV      | NM_182972        | c.G524A         | p.S175N           | 1          | 234744717 | 234744717 | C                  | T   | 359    | 0.036                    | Training | Haem_ATL_57 |
| <i>TP53</i>    | non synonymous SNV      | NM_000546        | c.G814A         | p.V272M           | 17         | 7577124   | 7577124   | T                  | T   | 1610   | 0.089                    | Training | Haem_ATL_57 |
| <i>PIK3CD</i>  | frameshift deletion     | NM_005026        | c.952_967del    | p.S318E           | 1          | 9777616   | 9777631   | CTCCCTGGAGGACCGT   | -   | 1524   | 0.262                    | Training | Haem_ATL_58 |
| <i>CCR4</i>    | nonframeshift deletion  | NM_005508        | c.1003_1017del  | p.S35_339del      | 3          | 32995917  | 32995933  | CTCCCAAAATTACTCT   | -   | 2534   | 0.258                    | Training | Haem_ATL_58 |
| <i>HLA-B</i>   | frameshift insertion    | NM_005514        | c.891dupA       | p.W298E           | 6          | 31323997  | 31323997  | -                  | T   | 2439   | 0.246                    | Training | Haem_ATL_58 |
| <i>POT1</i>    | non synonymous SNV      | NM_015420        | c.G703T         | p.L240Y           | 7          | 12409192  | 12409192  | A                  | A   | 1272   | 0.217                    | Training | Haem_ATL_58 |
| <i>TP53</i>    | non synonymous SNV      | NM_000546        | c.A350G         | p.H168R           | 17         | 7578427   | 7578427   | T                  | C   | 1024   | 0.506                    | Training | Haem_ATL_58 |
| <i>CCR4</i>    | frameshift insertion    | NM_005508        | c.967dupA       | p.C322E           | 3          | 32995880  | 32995880  | -                  | A   | 1753   | 0.335                    | Training | Haem_ATL_59 |
| <i>IF4</i>     | non synonymous SNV      | NM_002660        | c.C583C         | p.D120H           | 6          | 394962    | 394962    | G                  | C   | 1031   | 0.328                    | Training | Haem_ATL_59 |
| <i>CARD11</i>  | non synonymous SNV      | NM_032415        | c.C1267T        | p.R423V           | 7          | 2976745   | 2976745   | A                  | A   | 1355   | 0.523                    | Training | Haem_ATL_59 |
| <i>PRKCB</i>   | non synonymous SNV      | NM_002738        | c.G1279A        | p.D427N           | 16         | 24183630  | 24183630  | G                  | A   | 1029   | 0.351                    | Training | Haem_ATL_59 |
| <i>TBL1XR1</i> | frameshift deletion     | NM_024665        | c.3194delC      | p.Q107E           | 3          | 176769400 | 176769400 | G                  | -   | 1610   | 0.912                    | Training | Haem_ATL_60 |
| <i>TBL1XR1</i> | non synonymous SNV      | NM_024665        | c.C319A         | p.Q107K           | 3          | 176769400 | 176769400 | G                  | -   | 1312   | 0.348                    | Training | Haem_ATL_60 |
| <i>CARD11</i>  | non synonymous SNV      | NM_032415        | c.G1876A        | p.E620K           | 7          | 2963931   | 2963931   | C                  | T   | 1131   | 0.442                    | Training | Haem_ATL_60 |
| <i>PRKCB</i>   | non synonymous SNV      | NM_002738        | c.G1279A        | p.D427N           | 16         | 24183630  | 24183630  | G                  | A   | 1121   | 0.483                    | Training | Haem_ATL_60 |
| <i>VAV1</i>    | frameshift deletion     | NM_005428        | c.233_234del    | p.W78E            | 19         | 6853946   | 6853967   | CTCTCCACAGTGGGACAC | -   | 894    | 0.221                    | Training | Haem_ATL_60 |
| <i>VAV1</i>    | non synonymous SNV      | NM_005428        | c.G224G         | p.K782N           | 19         | 6853971   | 6853971   | G                  | A   | 687    | 0.601                    | Training | Haem_ATL_60 |
| <i>CARD11</i>  | non synonymous SNV      | NM_032415        | c.C1071G        | p.D357E           | 7          | 2977613   | 2977613   | G                  | C   | 1452</ |                          |          |             |

Supplemental Table 2. Somatic mutations detected by targeted capture sequencing in 183 ATL cases

| Gene      | Type of mutation       | Accession number | Base change        | Amino acid change | Chromosome | Start     | End       | Ref                             | Alt  | Depth | Variant allele frequency | Cohort   | Case ID     |
|-----------|------------------------|------------------|--------------------|-------------------|------------|-----------|-----------|---------------------------------|------|-------|--------------------------|----------|-------------|
| CCRA      | frameshift insertion   | NM_005508        | c.968dupG          | p.R323E           | 3          | 32995881  | 32995881  | -                               | G    | 829   | 0.18                     | Training | Haem_ATL_70 |
| RHOA      | nonynonymous SNV       | NM_001664        | c.G481C            | p.A161P           | 3          | 49397743  | 49397743  | G                               | G    | 464   | 0.034                    | Training | Haem_ATL_70 |
| CSNK1A1   | nonynonymous SNV       | NM_001892        | c.A407G            | p.D136G           | 5          | 14889902  | 14889902  | G                               | G    | 683   | 0.441                    | Training | Haem_ATL_70 |
| CSNK1A1   | nonynonymous SNV       | NM_001892        | c.C80T             | p.S27F            | 5          | 148930448 | 148930448 | G                               | A    | 42    | 0.287                    | Training | Haem_ATL_70 |
| PRKCB     | nonynonymous SNV       | NM_002738        | c.A1054G           | p.S352G           | 16         | 24135291  | 24135291  | A                               | G    | 439   | 0.219                    | Training | Haem_ATL_70 |
| PRKCB     | nonynonymous SNV       | NM_002738        | c.G1279A           | p.D427N           | 16         | 24183630  | 24183630  | G                               | A    | 311   | 0.058                    | Training | Haem_ATL_70 |
| VAV1      | nonynonymous SNV       | NM_005428        | c.G204A            | p.E682K           | 19         | 6848040   | 6848040   | G                               | A    | 331   | 0.063                    | Training | Haem_ATL_70 |
| PLCG1     | nonynonymous SNV       | NM_002660        | c.C142T            | p.R48W            | 20         | 39766423  | 39766423  | C                               | A    | 284   | 0.041                    | Training | Haem_ATL_70 |
| PLCG1     | nonframeshift deletion | NM_002660        | c.2178_2195del     | p.V736_732del     | 20         | 39795576  | 39795593  | AGGGAAGCTCCGGATTCGA             | -    | 493   | 0.212                    | Training | Haem_ATL_70 |
| IBF4      | nonynonymous SNV       | NM_002460        | c.C280G            | p.L70V            | 6          | 393360    | 393360    | C                               | G    | 2610  | 0.107                    | Training | Haem_ATL_71 |
| NOTCH1    | stopgain               | NM_017617        | c.G7306T           | p.G2436X          | 9          | 13939085  | 13939085  | C                               | A    | 2273  | 0.324                    | Training | Haem_ATL_71 |
| CCR7      | stopgain               | NM_001838        | c.C1060T           | p.Q554X           | 17         | 38711071  | 38711071  | G                               | A    | 3176  | 0.346                    | Training | Haem_ATL_71 |
| POT1      | nonynonymous SNV       | NM_015450        | c.C817T            | p.R273W           | 7          | 124493078 | 124493078 | G                               | A    | 1632  | 0.559                    | Training | Haem_ATL_72 |
| NOTCH1    | frameshift insertion   | NM_017617        | c.7535dupC         | p.P2512L          | 9          | 139390655 | 139390655 | -                               | G    | 4744  | 0.169                    | Training | Haem_ATL_72 |
| GATA3     | frameshift insertion   | NM_002051        | c.249_250insGT     | p.Q83E            | 10         | 8100275   | 8100275   | -                               | GT   | 1870  | 0.336                    | Training | Haem_ATL_72 |
| PRKCB     | nonynonymous SNV       | NM_002738        | c.G1279A           | p.D427N           | 16         | 24183630  | 24183630  | G                               | A    | 299   | 0.029                    | Training | Haem_ATL_72 |
| TP53      | frameshift deletion    | NM_005546        | c.105_133del       | p.L35E            | 17         | 7579554   | 7579582   | GCATGAATCCATTCCTGCTGGAGCGGC     | -    | 1246  | 0.201                    | Training | Haem_ATL_72 |
| CCR7      | stopgain               | NM_001838        | c.G1060T           | p.W355X           | 17         | 38711066  | 38711066  | C                               | T    | 2281  | 0.299                    | Training | Haem_ATL_72 |
| PLCG1     | nonynonymous SNV       | NM_002660        | c.G139A            | p.E47K            | 20         | 39766420  | 39766420  | G                               | A    | 1378  | 0.065                    | Training | Haem_ATL_72 |
| PLCG1     | nonynonymous SNV       | NM_002660        | c.C1559T           | p.S520F           | 20         | 39794139  | 39794139  | C                               | T    | 2175  | 0.091                    | Training | Haem_ATL_72 |
| CDS8      | frameshift deletion    | NM_001779        | c.352_355del       | p.L118E           | 1          | 11708942  | 11708945  | AAGA                            | -    | 883   | 0.085                    | Training | Haem_ATL_73 |
| CCRA      | frameshift insertion   | NM_005508        | c.987dupC          | p.C329E           | 3          | 32995900  | 32995900  | -                               | C    | 2656  | 0.187                    | Training | Haem_ATL_73 |
| TBL1XR1   | splicing               | NM_024665        | c.1122+2T>C        | NA                | 3          | 17675884  | 17675884  | A                               | G    | 1407  | 0.178                    | Training | Haem_ATL_73 |
| CARD11    | nonynonymous SNV       | NM_032415        | c.A1078G           | p.M360V           | 7          | 2977666   | 2977666   | T                               | C    | 1738  | 0.09                     | Training | Haem_ATL_73 |
| NOTCH1    | nonynonymous SNV       | NM_017617        | c.G5471A           | p.R1824Q          | 9          | 139396454 | 139396454 | C                               | T    | 1908  | 0.374                    | Training | Haem_ATL_73 |
| FAS       | frameshift deletion    | NM_000043        | c.690_724del       | p.S230E           | 10         | 90773889  | 90773923  | TAAATATCACCACATTCCTGGATCATGACAC | -    | 721   | 0.026                    | Training | Haem_ATL_73 |
| PLCG1     | nonframeshift deletion | NM_002660        | c.302_307del       | p.I108_1169del    | 20         | 39802399  | 39802404  | AGTGCC                          | -    | 2765  | 0.149                    | Training | Haem_ATL_73 |
| YTHDF2    | stopgain               | NM_016258        | c.C242T            | p.I2909D          | 1          | 29069206  | 29069206  | C                               | T    | 1076  | 0.044                    | Training | Haem_ATL_74 |
| CCRA      | frameshift deletion    | NM_005508        | c.980_993del       | p.V327E           | 3          | 32995900  | 32995907  | TGCTTCGCAATAC                   | -    | 1166  | 0.34                     | Training | Haem_ATL_74 |
| CARD11    | nonframeshift deletion | NM_032415        | c.701_703del       | p.T34_235del      | 7          | 2979544   | 2979546   | GGT                             | -    | 1022  | 0.316                    | Training | Haem_ATL_74 |
| VAV1      | nonynonymous SNV       | NM_005428        | c.A77G             | p.D26G            | 19         | 6772895   | 6772895   | A                               | G    | 973   | 0.332                    | Training | Haem_ATL_74 |
| PKCZD     | nonynonymous SNV       | NM_005026        | c.T1823G           | p.L608R           | 1          | 9781513   | 9781513   | T                               | G    | 435   | 0.315                    | Training | Haem_ATL_75 |
| RHOA      | nonynonymous SNV       | NM_001664        | c.G50T             | p.G17V            | 3          | 49412973  | 49412973  | C                               | A    | 690   | 0.287                    | Training | Haem_ATL_75 |
| POT1      | nonynonymous SNV       | NM_015450        | c.G1792T           | p.D598Y           | 7          | 124465306 | 124465306 | C                               | G    | 785   | 0.364                    | Training | Haem_ATL_75 |
| TP53      | frameshift deletion    | NM_005546        | c.514delG          | p.V172E           | 17         | 7578416   | 7578416   | C                               | A    | 648   | 0.611                    | Training | Haem_ATL_75 |
| PDE7B     | nonynonymous SNV       | NM_018945        | c.A227C            | p.Q76P            | 6          | 136468549 | 136468549 | A                               | C    | 32    | 0.32                     | Training | Haem_ATL_76 |
| HNRNP42B1 | stopgain               | NM_002157        | c.146delC          | p.S49X            | 15         | 26237053  | 26237053  | G                               | G    | 176   | 0.165                    | Training | Haem_ATL_76 |
| FAS       | frameshift deletion    | NM_000043        | c.604delT          | p.R720E           | 10         | 90773884  | 90773884  | T                               | A    | 104   | 0.007                    | Training | Haem_ATL_76 |
| TP53      | nonynonymous SNV       | NM_005546        | c.G664A            | p.V216M           | 17         | 7578203   | 7578203   | C                               | T    | 176   | 0.273                    | Training | Haem_ATL_76 |
| IBF4      | nonynonymous SNV       | NM_002460        | c.A176G            | p.K59R            | 6          | 393328    | 393328    | A                               | G    | 67    | 0.527                    | Training | Haem_ATL_77 |
| CSNK2B    | stopgain               | NM_001320        | c.C544T            | p.Q182X           | 6          | 31637272  | 31637272  | C                               | T    | 614   | 0.497                    | Training | Haem_ATL_77 |
| PRKCB     | nonynonymous SNV       | NM_002738        | c.G1279A           | p.D427N           | 16         | 24183630  | 24183630  | G                               | A    | 581   | 0.387                    | Training | Haem_ATL_77 |
| CCR7      | stopgain               | NM_001838        | c.G1064A           | p.W355X           | 17         | 38711067  | 38711067  | C                               | T    | 744   | 0.348                    | Training | Haem_ATL_77 |
| PLCG1     | nonynonymous SNV       | NM_002660        | c.G3493C           | p.D1165H          | 20         | 39802390  | 39802390  | G                               | C    | 983   | 0.501                    | Training | Haem_ATL_77 |
| CDS8      | frameshift insertion   | NM_001779        | c.268_269insAGCC   | p.L90E            | 1          | 117087028 | 117087028 | -                               | GGCT | 483   | 0.474                    | Training | Haem_ATL_78 |
| PTPRC     | nonynonymous SNV       | NM_002838        | c.A1774G           | p.I592V           | 1          | 19897922  | 19897922  | A                               | G    | 446   | 0.274                    | Training | Haem_ATL_78 |
| IBF2BP2   | frameshift deletion    | NM_182972        | c.1071_1075del     | p.R357E           | 1          | 22474572  | 22474576  | GGCTC                           | -    | 230   | 0.117                    | Training | Haem_ATL_78 |
| HLA-B     | nonynonymous SNV       | NM_005514        | c.G225A            | p.W75X            | 6          | 31224883  | 31224883  | C                               | T    | 175   | 0.389                    | Training | Haem_ATL_78 |
| CSNK2B    | splicing               | NM_00128285      | c.368+IG>A         | NA                | 6          | 31637104  | 31637104  | G                               | A    | 223   | 0.435                    | Training | Haem_ATL_78 |
| HNRNP42B1 | splicing               | NM_002157        | c.964+2T>C         | NA                | 7          | 26232869  | 26232869  | A                               | G    | 370   | 0.035                    | Training | Haem_ATL_78 |
| ZEB1      | frameshift insertion   | NM_030751        | c.631dupT          | p.A210E           | 10         | 31799749  | 31799749  | T                               | C    | 374   | 0.203                    | Training | Haem_ATL_78 |
| RELA      | stopgain               | NM_021975        | c.C985T            | p.R329X           | 11         | 65423207  | 65423207  | G                               | A    | 496   | 0.212                    | Training | Haem_ATL_78 |
| PRKCB     | nonframeshift deletion | NM_002738        | c.83_85del         | p.28_29del        | 16         | 23847579  | 23847581  | AGA                             | -    | 556   | 0.347                    | Training | Haem_ATL_78 |
| CSNK2A1   | nonynonymous SNV       | NM_001895        | c.C356A            | p.T119K           | 20         | 479909    | 479909    | G                               | T    | 396   | 0.369                    | Training | Haem_ATL_78 |
| PLCG1     | nonynonymous SNV       | NM_002660        | c.C142T            | p.R48W            | 20         | 39766423  | 39766423  | C                               | A    | 394   | 0.236                    | Training | Haem_ATL_78 |
| PLCG1     | nonynonymous SNV       | NM_002660        | c.G3493C           | p.D1165H          | 20         | 39802390  | 39802390  | G                               | C    | 479   | 0.219                    | Training | Haem_ATL_78 |
| CARD11    | nonynonymous SNV       | NM_032415        | c.T2705G           | p.F90K            | 7          | 2955005   | 2955005   | A                               | G    | 277   | 0.147                    | Training | Haem_ATL_79 |
| CCRA      | frameshift insertion   | NM_005508        | c.1024_1025insCCCC | p.T42E            | 3          | 32995938  | 32995938  | -                               | CCCC | 600   | 0.124                    | Training | Haem_ATL_80 |
| TT2       | stopgain               | NM_017628        | c.C973T            | p.Q255X           | 4          | 106156072 | 106156072 | C                               | T    | 535   | 0.228                    | Training | Haem_ATL_80 |
| TT2       | frameshift deletion    | NM_017628        | c.2798_2801del     | p.Q933E           | 4          | 106157897 | 106157900 | AGGG                            | -    | 584   | 0.146                    | Training | Haem_ATL_80 |
| CSNK2B    | stopgain               | NM_001320        | c.S64delC          | p.Y188X           | 6          | 31637619  | 31637619  | C                               | T    | 518   | 0.205                    | Training | Haem_ATL_80 |
| GATA3     | frameshift insertion   | NM_002051        | c.222_223insTACC   | p.R74E            | 10         | 8097840   | 8097840   | -                               | TACC | 663   | 0.157                    | Training | Haem_ATL_80 |
| CCRA      | stopgain               | NM_005508        | c.C993G            | p.Y331X           | 3          | 32995907  | 32995907  | C                               | G    | 906   | 0.167                    | Training | Haem_ATL_81 |
| HLA-B     | nonynonymous SNV       | NM_005514        | c.G1012A           | p.G338S           | 6          | 31322884  | 31322884  | C                               | T    | 485   | 0.115                    | Training | Haem_ATL_81 |
| NFKB1A    | splicing               | NM_020529        | c.337+IG>A         | NA                | 14         | 35872567  | 35872567  | C                               | A    | 266   | 0.049                    | Training | Haem_ATL_81 |
| TP53      | nonynonymous SNV       | NM_005546        | c.C620T            | p.V274F           | 17         | 7577118   | 7577118   | C                               | G    | 592   | 0.091                    | Training | Haem_ATL_81 |
| PLCG1     | nonframeshift deletion | NM_002660        | c.3502_3507del     | p.I1108_1109del   | 20         | 39802399  | 39802404  | AGTGCC                          | -    | 1012  | 0.217                    | Training | Haem_ATL_81 |
| CCRA      | stopgain               | NM_005508        | c.C1041A           | p.Y347X           | 3          | 32995955  | 32995955  | C                               | A    | 1186  | 0.641                    | Training | Haem_ATL_82 |
| TT2       | stopgain               | NM_017628        | c.C1945T           | p.Q649X           | 4          | 106157044 | 106157044 | C                               | T    | 1187  | 0.612                    | Training | Haem_ATL_82 |
| TT2       | frameshift deletion    | NM_001127208     | c.4931_4947del     | p.P1644E          | 4          | 106196598 | 106196614 | CATATCGGGTTCAT                  | -    | 1741  | 0.225                    | Training | Haem_ATL_82 |
| IBF4      | nonynonymous SNV       | NM_002460        | c.A176G            | p.K59R            | 6          | 393328    | 393328    | A                               | G    | 371   | 0.544                    | Training | Haem_ATL_82 |
| CARD11    | nonframeshift deletion | NM_032415        | c.640_642del       | p.214_214del      | 7          | 2983888   | 2983890   | CTC                             | -    | 1292  | 0.244                    | Training | Haem_ATL_82 |
| POT1      | nonynonymous SNV       | NM_015450        | c.G1891A           | p.E631K           | 7          | 124464030 | 124464030 | C                               | T    | 989   | 0.319                    | Training | Haem_ATL_82 |
| PLCG1     | nonynonymous SNV       | NM_002660        | c.C1034T           | p.S345F           | 20         | 39792584  | 39792584  | C                               | T    | 827   | 0.042                    | Training | Haem_ATL_82 |
| PLCG1     | nonynonymous SNV       | NM_002660        | c.G3487A           | p.E1163K          | 20         | 39802384  | 39802384  | G                               | A    | 883   | 0.412                    | Training | Haem_ATL_82 |
| TBL1XR1   | nonframeshift deletion | NM_024665        | c.971_973del       | p.S2_325del       | 3          | 176756175 | 176756177 | AAG                             | -    | 1389  | 0.255                    | Training | Haem_ATL_83 |
| STAT3     | nonynonymous SNV       | NM_003150        | c.A1919T           | p.Y40E            | 17         | 4047482   | 4047482   | T                               | A    | 960   | 0.329                    | Training | Haem_ATL_83 |
| PLCG1     | nonynonymous SNV       | NM_002660        | c.C142T            | p.R48W            | 20         | 39766423  | 39766423  | C                               | A    | 696   | 0.365                    | Training | Haem_ATL_83 |
| PLCG1     | nonynonymous SNV       | NM_002660        | c.C260G            | p.P867R           | 20         | 39798116  | 39798116  | C                               | G    | 644   | 0.307                    | Training | Haem_ATL_83 |
| CCRA      | stopgain               | NM_005508        | c.C993G            | p.Y331X           | 3          | 32995907  | 32995907  | C                               | G    | 840   | 0.1                      | Training | Haem_ATL_84 |
| IBF4      | nonynonymous SNV       | NM_002           |                    |                   |            |           |           |                                 |      |       |                          |          |             |

Supplemental Table 2. Somatic mutations detected by targeted capture sequencing in 183 ATL cases

| Gene      | Type of mutation       | Accession number | Base change    | Amino acid change | Chromosome | Start     | End       | Ref                                            | Alt | Depth | Variant allele frequency | Cohort     | Case ID     |
|-----------|------------------------|------------------|----------------|-------------------|------------|-----------|-----------|------------------------------------------------|-----|-------|--------------------------|------------|-------------|
| PRKCB     | nonsynonymous SNV      | NM_002738        | c.G1279A       | p.D427N           | 16         | 24183630  | 24183630  | G                                              | A   | 387   | 0.106                    | Training   | Haem_ATL_95 |
| PRKCB     | nonsynonymous SNV      | NM_002738        | c.G1636A       | p.E546K           | 16         | 24196802  | 24196802  | G                                              | A   | 344   | 0.134                    | Training   | Haem_ATL_95 |
| TNFAIP3   | frameshift deletion    | NM_006290        | c.1494delC     | p.C498E           | 6          | 138200076 | 138200076 | C                                              | -   | 580   | 0.148                    | Training   | Haem_ATL_96 |
| HNRNPA2B1 | nonsynonymous SNV      | NM_002137        | c.C908T        | p.P303L           | 7          | 26232927  | 26232927  | G                                              | A   | 290   | 0.114                    | Training   | Haem_ATL_97 |
| PLCG1     | nonsynonymous SNV      | NM_002660        | c.G2120A       | p.R707Q           | 20         | 39795235  | 39795235  | G                                              | A   | 136   | 0.037                    | Training   | Haem_ATL_97 |
| CCR4      | frameshift insertion   | NM_005508        | c.967dupA      | p.C322E           | 3          | 32995880  | 32995880  | A                                              | -   | 1349  | 0.18                     | Training   | Haem_ATL_98 |
| TP53      | nonsynonymous SNV      | NM_000546        | c.G733A        | p.G245S           | 17         | 7577548   | 7577548   | C                                              | T   | 358   | 0.209                    | Training   | Haem_ATL_98 |
| STAT3     | nonsynonymous SNV      | NM_003570        | c.A982T        | p.D561Y           | 17         | 40474119  | 40474119  | T                                              | A   | 692   | 0.14                     | Training   | Haem_ATL_98 |
| CCR4      | stopgain               | NM_005508        | c.C397A        | p.C329Y           | 3          | 32995901  | 32995901  | C                                              | A   | 908   | 0.066                    | Training   | Haem_ATL_99 |
| RHOA      | nonsynonymous SNV      | NM_001664        | c.T46C         | p.C148R           | 3          | 49412977  | 49412977  | A                                              | G   | 773   | 0.32                     | Training   | Haem_ATL_99 |
| TET2      | stopgain               | NM_017628        | c.C2181T       | p.Q740X           | 4          | 10615717  | 10615717  | C                                              | T   | 630   | 0.648                    | Training   | Haem_ATL_99 |
| FAS       | frameshift deletion    | NM_000043        | c.696_741del   | p.Y232E           | 10         | 90773895  | 90773895  | TATCAACCATATTGCTGGAGTCATGACACTAAAGTCAAGTAAAGGC | -   | 513   | 0.099                    | Training   | Haem_ATL_99 |
| CD58      | frameshift deletion    | NM_001779        | c.88delT       | p.S305E           | 1          | 1.17E+08  | 1.17E+08  | A                                              | -   | 459   | 0.468                    | Validation | Haem_ATL_1  |
| RHOA      | nonsynonymous SNV      | NM_001664        | c.T46C         | p.C168R           | 3          | 49412977  | 49412977  | A                                              | G   | 619   | 0.108                    | Validation | Haem_ATL_1  |
| TBL1XR1   | stopgain               | NM_024665        | c.C1291T       | p.R431X           | 3          | 1.77E+08  | 1.77E+08  | G                                              | A   | 512   | 0.455                    | Validation | Haem_ATL_1  |
| TP53      | nonsynonymous SNV      | NM_000546        | c.T370G        | p.C124G           | 17         | 7579317   | 7579317   | A                                              | C   | 152   | 0.382                    | Validation | Haem_ATL_1  |
| AVI1      | nonsynonymous SNV      | NM_005428        | c.G2383A       | p.A795T           | 19         | 6854008   | 6854008   | G                                              | A   | 456   | 0.338                    | Validation | Haem_ATL_1  |
| TET2      | stopgain               | NM_00122708      | c.A409T        | p.K1353X          | 4          | 1.06E+08  | 1.06E+08  | A                                              | T   | 982   | 0.371                    | Validation | Haem_ATL_2  |
| TET2      | stopgain               | NM_00122708      | c.C4519T       | p.O1507X          | 4          | 1.06E+08  | 1.06E+08  | C                                              | T   | 297   | 0.175                    | Validation | Haem_ATL_2  |
| IRF4      | nonsynonymous SNV      | NM_002460        | c.A176G        | p.K59R            | 6          | 393328    | 393328    | A                                              | G   | 611   | 0.504                    | Validation | Haem_ATL_2  |
| PRKCB     | nonsynonymous SNV      | NM_002738        | c.G1888A       | p.D630N           | 16         | 24226003  | 24226003  | G                                              | A   | 959   | 0.377                    | Validation | Haem_ATL_2  |
| TP53      | nonsynonymous SNV      | NM_000546        | c.G733A        | p.G245S           | 17         | 7577548   | 7577548   | C                                              | T   | 399   | 0.281                    | Validation | Haem_ATL_2  |
| CCR4      | frameshift insertion   | NM_005508        | c.966dupC      | p.C322E           | 3          | 32995879  | 32995879  | C                                              | -   | 1521  | 0.688                    | Validation | Haem_ATL_3  |
| CSNK2A1   | stopgain               | NM_001895        | c.C61T         | p.R21X            | 20         | 489135    | 489135    | G                                              | A   | 488   | 0.344                    | Validation | Haem_ATL_3  |
| GATA3     | frameshift deletion    | NM_002051        | c.18_39del     | p.D6E             | 10         | 8097636   | 8097636   | CCAGCCCGCGCTGGGTGAGCCAC                        | -   | 271   | 0.218                    | Validation | Haem_ATL_4  |
| GATA3     | nonsynonymous SNV      | NM_002051        | c.C42G         | p.H14Q            | 10         | 8097660   | 8097660   | C                                              | A   | 189   | 0.243                    | Validation | Haem_ATL_4  |
| TP53      | nonsynonymous SNV      | NM_000546        | c.G841C        | p.D281H           | 17         | 7577097   | 7577097   | C                                              | G   | 233   | 0.592                    | Validation | Haem_ATL_4  |
| SPR1      | frameshift insertion   | NM_001409        | c.499dupT      | p.A166E           | 1          | 1.02E+08  | 1.02E+08  | A                                              | -   | 908   | 0.379                    | Validation | Haem_ATL_6  |
| CCR4      | stopgain               | NM_005508        | c.C1034A       | p.S545X           | 3          | 32995948  | 32995948  | C                                              | A   | 575   | 0.286                    | Validation | Haem_ATL_6  |
| RHOA      | nonsynonymous SNV      | NM_001664        | c.G481C        | p.A161P           | 3          | 49397743  | 49397743  | C                                              | G   | 832   | 0.29                     | Validation | Haem_ATL_6  |
| CARD11    | nonsynonymous SNV      | NM_032415        | c.G1876A       | p.E626K           | 7          | 2963931   | 2963931   | C                                              | G   | 603   | 0.619                    | Validation | Haem_ATL_6  |
| NOTCH1    | stopgain               | NM_017617        | c.C7225T       | p.Q2409X          | 9          | 1.39E+08  | 1.39E+08  | G                                              | A   | 227   | 0.912                    | Validation | Haem_ATL_6  |
| CCR7      | stopgain               | NM_001838        | c.G1064A       | p.W355X           | 17         | 38711067  | 38711067  | C                                              | T   | 353   | 0.331                    | Validation | Haem_ATL_6  |
| STAT3     | nonsynonymous SNV      | NM_003570        | c.G2101T       | p.A701S           | 17         | 40469240  | 40469240  | C                                              | A   | 344   | 0.384                    | Validation | Haem_ATL_6  |
| PLCG1     | nonsynonymous SNV      | NM_002660        | c.C1034T       | p.S345F           | 20         | 39792584  | 39792584  | C                                              | T   | 389   | 0.44                     | Validation | Haem_ATL_6  |
| PIK3CD    | nonsynonymous SNV      | NM_005026        | c.A2254G       | p.M752Y           | 1          | 9782321   | 9782321   | A                                              | G   | 238   | 0.326                    | Validation | Haem_ATL_7  |
| CCR4      | stopgain               | NM_005508        | c.C987A        | p.C329X           | 3          | 32995901  | 32995901  | C                                              | A   | 310   | 0.335                    | Validation | Haem_ATL_7  |
| CARD11    | nonsynonymous SNV      | NM_032415        | c.G1876A       | p.E626K           | 7          | 2963931   | 2963931   | C                                              | G   | 273   | 0.3                      | Validation | Haem_ATL_7  |
| PLCG1     | nonsynonymous SNV      | NM_002660        | c.A3506G       | p.D1169G          | 20         | 39802403  | 39802403  | A                                              | G   | 282   | 0.039                    | Validation | Haem_ATL_7  |
| TBL1XR1   | nonsynonymous SNV      | NM_024665        | c.A42T         | p.R14S            | 3          | 1.77E+08  | 1.77E+08  | T                                              | A   | 353   | 0.357                    | Validation | Haem_ATL_8  |
| FAS       | splicing               | NM_000043        | c.652_1G>T     | NA                | 10         | 90773099  | 90773099  | G                                              | T   | 107   | 0.607                    | Validation | Haem_ATL_8  |
| TP53      | nonsynonymous SNV      | NM_000546        | c.C799G        | p.R267G           | 17         | 7577139   | 7577139   | G                                              | C   | 275   | 0.636                    | Validation | Haem_ATL_8  |
| PLCG1     | nonsynonymous SNV      | NM_002660        | c.G3493C       | p.D1165H          | 20         | 39802390  | 39802390  | G                                              | C   | 812   | 0.096                    | Validation | Haem_ATL_8  |
| IRF2BP2   | nonsynonymous SNV      | NM_182972        | c.C274G        | p.L92V            | 1          | 2.35E+08  | 2.35E+08  | G                                              | A   | 62    | 0.328                    | Validation | Haem_ATL_9  |
| CCR4      | stopgain               | NM_005508        | c.C987A        | p.C329X           | 3          | 32995901  | 32995901  | C                                              | A   | 1221  | 0.573                    | Validation | Haem_ATL_9  |
| IRF4      | nonsynonymous SNV      | NM_002460        | c.C342A        | p.S114R           | 6          | 394946    | 394946    | C                                              | A   | 543   | 0.18                     | Validation | Haem_ATL_9  |
| HLA-B     | stopgain               | NM_005514        | c.G723A        | p.W241X           | 6          | 3132266   | 3132266   | C                                              | T   | 264   | 0.436                    | Validation | Haem_ATL_9  |
| PRKCB     | nonsynonymous SNV      | NM_002738        | c.G1126A       | p.D1660E          | 16         | 24166065  | 24166065  | G                                              | A   | 575   | 0.311                    | Validation | Haem_ATL_9  |
| AVI1      | nonsynonymous SNV      | NM_005428        | c.G469A        | p.E157K           | 19         | 6822251   | 6822251   | G                                              | A   | 270   | 0.507                    | Validation | Haem_ATL_9  |
| EP300     | splicing               | NA               | NA             | NA                | 22         | 41551118  | 41551121  | GTAA                                           | -   | 1083  | 0.237                    | Validation | Haem_ATL_9  |
| CCR4      | nonsynonymous SNV      | NM_005508        | c.C987A        | p.C329X           | 3          | 32995901  | 32995901  | C                                              | A   | 1013  | 0.554                    | Validation | Haem_ATL_10 |
| GATA3     | nonsynonymous SNV      | NM_002051        | c.G862A        | p.G288R           | 10         | 8106042   | 8106042   | G                                              | A   | 628   | 0.398                    | Validation | Haem_ATL_10 |
| CCR7      | stopgain               | NM_001838        | c.G1065A       | p.W355X           | 17         | 38711066  | 38711066  | C                                              | T   | 501   | 0.365                    | Validation | Haem_ATL_10 |
| PLCG1     | nonsynonymous SNV      | NM_002660        | c.T3499G       | p.F1167V          | 20         | 39802396  | 39802396  | T                                              | G   | 642   | 0.329                    | Validation | Haem_ATL_10 |
| TBL1XR1   | nonsynonymous SNV      | NM_024665        | c.T1341G       | p.S447R           | 3          | 1.77E+08  | 1.77E+08  | A                                              | C   | 497   | 0.928                    | Validation | Haem_ATL_11 |
| CCR4      | frameshift insertion   | NM_005508        | c.968dupR      | p.R323E           | 3          | 32995881  | 32995881  | -                                              | -   | 1628  | 0.228                    | Validation | Haem_ATL_12 |
| TBL1XR1   | nonsynonymous SNV      | NM_024665        | c.A1328T       | p.E445V           | 3          | 1.77E+08  | 1.77E+08  | T                                              | G   | 956   | 0.231                    | Validation | Haem_ATL_12 |
| CARD11    | nonsynonymous SNV      | NM_032415        | c.G1876A       | p.E626K           | 7          | 2963931   | 2963931   | G                                              | A   | 664   | 0.297                    | Validation | Haem_ATL_12 |
| CARD11    | nonsynonymous SNV      | NM_032415        | c.A1082G       | p.Y361C           | 7          | 2977602   | 2977602   | T                                              | C   | 877   | 0.273                    | Validation | Haem_ATL_12 |
| NFKB1     | nonsynonymous SNV      | NM_020529        | c.C193G        | p.P65A            | 14         | 5857368   | 5857368   | G                                              | C   | 610   | 0.134                    | Validation | Haem_ATL_12 |
| PLCG1     | nonframeshift deletion | NM_002660        | c.3509_3511del | p.I1170_1171del   | 20         | 39802406  | 39802408  | AGA                                            | -   | 1470  | 0.121                    | Validation | Haem_ATL_12 |
| CCR4      | stopgain               | NM_005508        | c.C993G        | p.Y331X           | 3          | 32995907  | 32995907  | C                                              | A   | 1492  | 0.186                    | Validation | Haem_ATL_13 |
| IRF4      | nonsynonymous SNV      | NM_002460        | c.A176G        | p.K59R            | 6          | 393328    | 393328    | A                                              | G   | 1112  | 0.18                     | Validation | Haem_ATL_13 |
| HNRNPA2B1 | nonsynonymous SNV      | NM_002137        | c.C907A        | p.P303T           | 7          | 26232928  | 26232928  | G                                              | T   | 1494  | 0.17                     | Validation | Haem_ATL_13 |
| PLCG1     | nonsynonymous SNV      | NM_002660        | c.C2617T       | p.R873W           | 20         | 39798133  | 39798133  | C                                              | T   | 993   | 0.163                    | Validation | Haem_ATL_13 |
| PLCG1     | nonsynonymous SNV      | NM_002660        | c.G3493C       | p.D1165H          | 20         | 39802390  | 39802390  | G                                              | C   | 1492  | 0.166                    | Validation | Haem_ATL_13 |
| IRF4      | nonsynonymous SNV      | NM_002460        | c.A146G        | p.K59E            | 6          | 393328    | 393328    | A                                              | G   | 1151  | 0.276                    | Validation | Haem_ATL_14 |
| CSNK2B    | stopgain               | NM_001329        | c.G517T        | p.E117X           | 6          | 31637245  | 31637245  | G                                              | T   | 1126  | 0.153                    | Validation | Haem_ATL_14 |
| CD58      | stopgain               | NM_001779        | c.C471G        | p.Y157X           | 1          | 1.17E+08  | 1.17E+08  | G                                              | C   | 918   | 0.27                     | Validation | Haem_ATL_15 |
| CDKN2A    | stopgain               | NM_000077        | c.C238T        | p.R80X            | 9          | 21971120  | 21971120  | G                                              | A   | 416   | 0.466                    | Validation | Haem_ATL_15 |
| GATA3     | stopgain               | NM_002051        | c.C166T        | p.Q56X            | 10         | 8097784   | 8097784   | C                                              | T   | 987   | 0.305                    | Validation | Haem_ATL_15 |
| FAS       | frameshift deletion    | NM_000043        | c.608_630del   | p.R203E           | 10         | 90771795  | 90771817  | GAAAGGAAACCAACCAAGTTCTCAT                      | -   | 1064  | 0.372                    | Validation | Haem_ATL_15 |
| PRKCB     | nonsynonymous SNV      | NM_002738        | c.G1065A       | p.D427N           | 16         | 24183630  | 24183630  | G                                              | A   | 974   | 0.309                    | Validation | Haem_ATL_15 |
| CCR4      | nonframeshift deletion | NM_005508        | c.1043_1060del | p.348_354del      | 3          | 32995957  | 32995974  | CGCAGTCCACCATGGATC                             | -   | 2461  | 0.295                    | Validation | Haem_ATL_16 |
| TET2      | frameshift deletion    | NM_00122708      | c.4865_4870del | p.L1621E          | 4          | 1.06E+08  | 1.06E+08  | TGTTAGTC                                       | -   | 2335  | 0.204                    | Validation | Haem_ATL_16 |
| GATA3     | frameshift insertion   | NM_002051        | c.305dupC      | p.A102E           | 10         | 8100350   | 8100350   | -                                              | -   | 770   | 0.251                    | Validation | Haem_ATL_16 |
| PRKCB     | nonsynonymous SNV      | NM_002738        | c.G1279A       | p.D427N           | 16         | 24183630  | 24183630  | G                                              | A   | 1924  | 0.248                    | Validation | Haem_ATL_16 |
| PLCG1     | nonsynonymous SNV      | NM_002660        | c.G141C        | p.E147D           | 20         | 39766422  | 39766422  | G                                              | C   | 1720  | 0.247                    | Validation | Haem_ATL_16 |
| PLCG1     | nonsynonymous SNV      | NM_002660        | c.C142T        | p.R48W            | 20         | 39766423  | 39766423  | C                                              | T   | 778   | 0.247                    | Validation | Haem_ATL_16 |
| PLCG1     | nonsynonymous SNV      | NM_002660        | c.T1525G       | p.Y509D           | 20         | 39794105  | 39794105  | G                                              | T   | 1128  | 0.277                    | Validation | Haem_ATL_16 |
| TP53      | nonsynonymous SNV      | NM_000546        | c.G404A        | p.C135Y           | 17         | 7578526   | 7578526   | C                                              | T   | 187   | 0.759                    | Validation | Haem_ATL_17 |
| PLCG1     | nonsynonymous SNV      | NM_002660        | c.C142T        |                   |            |           |           |                                                |     |       |                          |            |             |

Supplemental Table 2. Somatic mutations detected by targeted capture sequencing in 183 ATL cases

| Gene    | Type of mutation       | Accession number | Base change        | Amino acid change | Chromosome | Start    | End                             | Ref  | Alt  | Depth | Variant allele frequency | Cohort           | Case ID     |
|---------|------------------------|------------------|--------------------|-------------------|------------|----------|---------------------------------|------|------|-------|--------------------------|------------------|-------------|
| TP53    | nonsynonymous SNV      | NM_000546        | c.G814T            | p.V272L           | 17         | 7577124  | 7577124 C                       | A    | 513  | -     | -                        | 0.037 Validation | Haem_ATL_30 |
| STAT3   | nonsynonymous SNV      | NM_003150        | c.G1852C           | p.G618R           | 17         | 4047508  | 4047508 G                       | A    | 964  | -     | -                        | 0.525 Validation | Haem_ATL_30 |
| VAV1    | nonsynonymous SNV      | NM_005428        | c.A524T            | p.E175V           | 19         | 6822306  | 6822306 G                       | T    | 441  | -     | -                        | 0.764 Validation | Haem_ATL_30 |
| IRF4    | nonframeshift deletion | NM_005428        | c.2335_2352del     | p.779_784del      | 19         | 6839360  | 6839377 GGAAGCACAAGATTATT       | G    | -    | 1077  | -                        | 0.605 Validation | Haem_ATL_30 |
| ATXN1   | stopgain               | NM_000320        | c.G196A            | p.E66K            | 6          | 393348   | 393348 G                        | A    | 726  | -     | -                        | 0.186 Validation | Haem_ATL_31 |
| HLA-B   | stopgain               | NM_000514        | c.C1973A           | p.S658X           | 6          | 16307035 | 16307035 G                      | T    | 751  | -     | -                        | 0.26 Validation  | Haem_ATL_31 |
| HLA-B   | stopgain               | NM_000514        | c.G225A            | p.W75X            | 6          | 31324583 | 31324583 C                      | T    | 697  | -     | -                        | 0.211 Validation | Haem_ATL_31 |
| B2M     | stopgain               | NM_000408        | c.T20A             | p.L7X             | 15         | 4500764  | 4500764 T                       | A    | 664  | -     | -                        | 0.191 Validation | Haem_ATL_31 |
| PRKCB   | nonsynonymous SNV      | NM_002738        | c.A1211G           | p.R440R           | 16         | 23847561 | 23847561 G                      | A    | 635  | -     | -                        | 0.212 Validation | Haem_ATL_31 |
| CCR4    | stopgain               | NM_005508        | c.C993G            | p.Y331X           | 3          | 32995907 | 32995907 C                      | G    | 1413 | -     | -                        | 0.078 Validation | Haem_ATL_32 |
| GATA3   | frameshift deletion    | NM_002051        | c.R146C            | p.H27fs           | 10         | 8097699  | 8097699 C                       | -    | 790  | -     | -                        | 0.039 Validation | Haem_ATL_32 |
| IRF2BP2 | nonsynonymous SNV      | NM_182972        | c.G116T            | p.G39V            | 1          | 2.35E+08 | 2.35E+08 C                      | A    | 516  | -     | -                        | 0.12 Validation  | Haem_ATL_33 |
| ZFP36L2 | frameshift insertion   | NM_006887        | c.1395dupC         | p.S466fs          | 2          | 43451547 | 43451547 T                      | G    | 255  | -     | -                        | 0.212 Validation | Haem_ATL_33 |
| CCR4    | frameshift insertion   | NM_005508        | c.968dupG          | p.R323fs          | 3          | 32995881 | 32995881 T                      | G    | 1707 | -     | -                        | 0.299 Validation | Haem_ATL_33 |
| RHOA    | nonsynonymous SNV      | NM_001664        | c.G50T             | p.G17V            | 3          | 49412973 | 49412973 C                      | A    | 1239 | -     | -                        | 0.165 Validation | Haem_ATL_33 |
| HLA-B   | nonsynonymous SNV      | NM_000514        | c.G3T              | p.M11             | 6          | 31324933 | 31324933 C                      | A    | 201  | -     | -                        | 0.201 Validation | Haem_ATL_33 |
| PRKCB   | nonsynonymous SNV      | NM_002738        | c.G1279A           | p.D427N           | 16         | 24183630 | 24183630 G                      | A    | 478  | -     | -                        | 0.055 Validation | Haem_ATL_33 |
| STAT3   | nonsynonymous SNV      | NM_003150        | c.G641A            | p.R214Q           | 17         | 40489785 | 40489785 C                      | T    | 864  | -     | -                        | 0.109 Validation | Haem_ATL_33 |
| VAV1    | nonsynonymous SNV      | NM_005428        | c.A1211G           | p.R440R           | 19         | 6828857  | 6828857 G                       | G    | 1049 | -     | -                        | 0.039 Validation | Haem_ATL_33 |
| EP300   | stopgain               | NM_001429        | c.C604T            | p.R202X           | 22         | 41513700 | 41513700 C                      | T    | 1056 | -     | -                        | 0.221 Validation | Haem_ATL_33 |
| CCR4    | stopgain               | NM_005508        | c.C993A            | p.Y331X           | 3          | 32995907 | 32995907 C                      | A    | 1102 | -     | -                        | 0.263 Validation | Haem_ATL_34 |
| TBL1XR1 | nonsynonymous SNV      | NM_024665        | c.A920C            | p.H307P           | 3          | 1.77E+08 | 1.77E+08 T                      | G    | 700  | -     | -                        | 0.297 Validation | Haem_ATL_34 |
| CSNK2B  | nonsynonymous SNV      | NM_001320        | c.T102G            | p.F34L            | 6          | 31635674 | 31635674 T                      | G    | 948  | -     | -                        | 0.138 Validation | Haem_ATL_34 |
| STAT3   | nonsynonymous SNV      | NM_003150        | c.G1981T           | p.D661Y           | 17         | 40474420 | 40474420 C                      | A    | 1015 | -     | -                        | 0.23 Validation  | Haem_ATL_34 |
| VAV1    | nonsynonymous SNV      | NM_005428        | c.A1196T           | p.H399L           | 19         | 6828842  | 6828842 C                       | T    | 938  | -     | -                        | 0.493 Validation | Haem_ATL_34 |
| CSNK1A1 | nonsynonymous SNV      | NM_001892        | c.G85A             | p.G29R            | 5          | 1.49E+08 | 1.49E+08 C                      | T    | 770  | -     | -                        | 0.188 Validation | Haem_ATL_35 |
| STAT3   | nonsynonymous SNV      | NM_003150        | c.G1852C           | p.G618R           | 17         | 4047508  | 4047508 C                       | G    | 715  | -     | -                        | 0.19 Validation  | Haem_ATL_35 |
| CARD11  | nonsynonymous SNV      | NM_032415        | c.G1279A           | p.D427N           | 7          | 2979559  | 2979559 C                       | T    | 111  | -     | -                        | 0.109 Validation | Haem_ATL_37 |
| PLCG1   | nonsynonymous SNV      | NM_002660        | c.C142T            | p.R48W            | 20         | 39766423 | 39766423 C                      | T    | 649  | -     | -                        | 0.039 Validation | Haem_ATL_38 |
| CCR4    | stopgain               | NM_005508        | c.C993G            | p.Y331X           | 3          | 32995907 | 32995907 C                      | G    | 1290 | -     | -                        | 0.185 Validation | Haem_ATL_39 |
| FYN     | nonsynonymous SNV      | NM_002037        | c.E526T            | p.R176C           | 6          | 1.12E+08 | 1.12E+08 G                      | A    | 961  | -     | -                        | 0.085 Validation | Haem_ATL_39 |
| NFKB1A  | stopgain               | NM_020529        | c.C130T            | p.Q44X            | 14         | 35873721 | 35873721 G                      | A    | 832  | -     | -                        | 0.232 Validation | Haem_ATL_39 |
| PLCG1   | nonsynonymous SNV      | NM_002660        | c.C142T            | p.R48W            | 20         | 39766423 | 39766423 C                      | T    | 646  | -     | -                        | 0.257 Validation | Haem_ATL_39 |
| PLCG1   | nonsynonymous SNV      | NM_002660        | c.G2258C           | p.R753P           | 20         | 39795456 | 39795456 G                      | C    | 981  | -     | -                        | 0.14 Validation  | Haem_ATL_39 |
| CCR4    | frameshift insertion   | NM_005508        | c.967dupA          | p.C322fs          | 3          | 32995880 | 32995880 T                      | A    | 1118 | -     | -                        | 0.457 Validation | Haem_ATL_40 |
| IRF4    | nonsynonymous SNV      | NM_002460        | c.A1169C           | p.E390A           | 6          | 405087   | 405087 A                        | C    | 313  | -     | -                        | 0.374 Validation | Haem_ATL_40 |
| HLA-B   | stopgain               | NM_000514        | c.C358T            | p.Q120X           | 6          | 31324205 | 31324205 G                      | A    | 31   | -     | -                        | 0.548 Validation | Haem_ATL_40 |
| CPH1B3  | frameshift insertion   | NM_004951        | c.795dupT          | p.P266fs          | 13         | 99947604 | 99947604 A                      | A    | 440  | -     | -                        | 0.455 Validation | Haem_ATL_40 |
| TP53    | nonsynonymous SNV      | NM_000546        | c.G524A            | p.R175H           | 17         | 7578406  | 7578406 C                       | T    | 87   | -     | -                        | 0.575 Validation | Haem_ATL_40 |
| PLCG1   | nonsynonymous SNV      | NM_002660        | c.C1034T           | p.S345F           | 20         | 39792584 | 39792584 C                      | T    | 214  | -     | -                        | 0.079 Validation | Haem_ATL_40 |
| PLCG1   | nonsynonymous SNV      | NM_002660        | c.G2605A           | p.G869R           | 20         | 39798121 | 39798121 G                      | A    | 246  | -     | -                        | 0.033 Validation | Haem_ATL_40 |
| KDM6A   | stopgain               | NM_021140        | c.C2128T           | p.Q710X           | X          | 44929028 | 44929028 C                      | T    | 131  | -     | -                        | 0.466 Validation | Haem_ATL_40 |
| GATA3   | splicing               | NM_002051        | c.241+1G>A         | NA                | 10         | 8097860  | 8097860 G                       | A    | 72   | -     | -                        | 0.736 Validation | Haem_ATL_41 |
| IDH2    | nonsynonymous SNV      | NM_002168        | c.G515A            | p.R172K           | 15         | 90631838 | 90631838 C                      | T    | 155  | -     | -                        | 0.439 Validation | Haem_ATL_41 |
| PRKCB   | nonsynonymous SNV      | NM_002738        | c.G1279A           | p.D427N           | 16         | 24183630 | 24183630 G                      | A    | 324  | -     | -                        | 0.435 Validation | Haem_ATL_41 |
| NOTCH1  | frameshift deletion    | NM_017617        | c.7541_7542del     | p.P2514fs         | 9          | 1.39E+08 | 1.39E+08 AG                     | -    | 264  | -     | -                        | 0.163 Validation | Haem_ATL_42 |
| PRKCB   | nonsynonymous SNV      | NM_002738        | c.G1046A           | p.G349E           | 16         | 24135283 | 24135283 G                      | A    | 176  | -     | -                        | 0.301 Validation | Haem_ATL_42 |
| PRKCB   | nonsynonymous SNV      | NM_002738        | c.G1279A           | p.D427N           | 16         | 24183630 | 24183630 G                      | A    | 167  | -     | -                        | 0.033 Validation | Haem_ATL_42 |
| PLCG1   | nonsynonymous SNV      | NM_002660        | c.A430G            | p.T144A           | 20         | 39788569 | 39788569 G                      | A    | 168  | -     | -                        | 0.177 Validation | Haem_ATL_42 |
| PLCG1   | nonsynonymous SNV      | NM_002660        | c.C1034T           | p.S345F           | 20         | 39792584 | 39792584 C                      | T    | 123  | -     | -                        | 0.301 Validation | Haem_ATL_42 |
| TBL1XR1 | nonsynonymous SNV      | NM_024665        | c.A860T            | p.D287V           | 3          | 1.77E+08 | 1.77E+08 T                      | A    | 296  | -     | -                        | 0.22 Validation  | Haem_ATL_43 |
| CARD11  | nonsynonymous SNV      | NM_032415        | c.G1159T           | p.D387Y           | 7          | 2976853  | 2976853 C                       | A    | 352  | -     | -                        | 0.457 Validation | Haem_ATL_43 |
| CCR4    | stopgain               | NM_005508        | c.C993G            | p.Y331X           | 3          | 32995907 | 32995907 C                      | G    | 605  | -     | -                        | 0.357 Validation | Haem_ATL_44 |
| IRF4    | nonsynonymous SNV      | NM_002460        | c.C70T             | p.L24F            | 6          | 393222   | 393222 C                        | T    | 265  | -     | -                        | 0.2 Validation   | Haem_ATL_44 |
| IRF4    | nonsynonymous SNV      | NM_002460        | c.A176G            | p.K59R            | 6          | 393328   | 393328 A                        | G    | 365  | -     | -                        | 0.682 Validation | Haem_ATL_44 |
| CD58    | frameshift deletion    | NM_001779        | c.356delA          | p.Y119fs          | 1          | 1.17E+08 | 1.17E+08 T                      | -    | 103  | -     | -                        | 0.117 Validation | Haem_ATL_45 |
| CCR4    | frameshift insertion   | NM_005508        | c.1024_1025insCCCC | p.L342fs          | 3          | 32995938 | 32995938 T                      | CCCC | 267  | -     | -                        | 0.377 Validation | Haem_ATL_45 |
| TBL1XR1 | nonsynonymous SNV      | NM_024665        | c.A79C             | p.R464P           | 3          | 1.77E+08 | 1.77E+08 T                      | A    | 354  | -     | -                        | 0.945 Validation | Haem_ATL_45 |
| TET2    | frameshift deletion    | NM_001127208     | c.3951_3952del     | p.K1317fs         | 4          | 1.06E+08 | 1.06E+08 AG                     | -    | 517  | -     | -                        | 0.422 Validation | Haem_ATL_45 |
| TET2    | stopgain               | NM_001127208     | c.C4210T           | p.R1404X          | 4          | 1.06E+08 | 1.06E+08 C                      | T    | 481  | -     | -                        | 0.449 Validation | Haem_ATL_45 |
| HLA-B   | frameshift insertion   | NM_000514        | c.626dupC          | p.P209fs          | 6          | 31323362 | 31323362 T                      | G    | 257  | -     | -                        | 0.724 Validation | Haem_ATL_45 |
| PDE7B   | splicing               | NM_018945        | c.580-2A>G         | NA                | 6          | 1.36E+08 | 1.36E+08 A                      | G    | 186  | -     | -                        | 0.457 Validation | Haem_ATL_45 |
| ZEB1    | stopgain               | NM_030751        | c.C973T            | p.R325X           | 10         | 31809236 | 31809236 C                      | T    | 562  | -     | -                        | 0.427 Validation | Haem_ATL_45 |
| FAS     | nonsynonymous SNV      | NM_000043        | c.A775G            | p.I259V           | 10         | 90773974 | 90773974 A                      | G    | 472  | -     | -                        | 0.479 Validation | Haem_ATL_45 |
| FAS     | nonsynonymous SNV      | NM_000043        | c.C795A            | p.D265E           | 10         | 90773994 | 90773994 C                      | A    | 454  | -     | -                        | 0.464 Validation | Haem_ATL_45 |
| PRKCB   | nonsynonymous SNV      | NM_002738        | c.G1888A           | p.D630N           | 16         | 24226003 | 24226003 G                      | A    | 891  | -     | -                        | 0.444 Validation | Haem_ATL_45 |
| VAV1    | nonsynonymous SNV      | NM_005428        | c.A788C            | p.G498K           | 19         | 6832195  | 6832195 C                       | G    | 459  | -     | -                        | 0.176 Validation | Haem_ATL_45 |
| FAS     | nonsynonymous SNV      | NM_000043        | c.A788C            | p.K232T           | 10         | 90773987 | 90773987 A                      | C    | 295  | -     | -                        | 0.349 Validation | Haem_ATL_47 |
| TP53    | stopgain               | NM_000546        | c.A358T            | p.K120X           | 17         | 7579329  | 7579329 T                       | A    | 74   | -     | -                        | 0.703 Validation | Haem_ATL_47 |
| CCR4    | stopgain               | NM_005508        | c.C987A            | p.C329X           | 3          | 32995901 | 32995901 C                      | A    | 426  | -     | -                        | 0.481 Validation | Haem_ATL_48 |
| HLA-B   | frameshift insertion   | NM_000514        | c.338_339insT      | p.E113fs          | 6          | 31324469 | 31324469 T                      | G    | 73   | -     | -                        | 0.849 Validation | Haem_ATL_48 |
| HLA-B   | nonsynonymous SNV      | NM_000514        | c.G149A            | p.G50D            | 6          | 31324659 | 31324659 C                      | T    | 113  | -     | -                        | 0.735 Validation | Haem_ATL_48 |
| CARD11  | nonsynonymous SNV      | NM_032415        | c.C335T            | p.T112I           | 7          | 2985476  | 2985476 G                       | A    | 796  | -     | -                        | 0.648 Validation | Haem_ATL_48 |
| PRKCB   | nonsynonymous SNV      | NM_002738        | c.A1280G           | p.D427G           | 16         | 24183631 | 24183631 A                      | G    | 272  | -     | -                        | 0.382 Validation | Haem_ATL_48 |
| CD58    | nonframeshift deletion | NM_001779        | c.391_402del       | p.I31_134del      | 1          | 1.17E+08 | 1.17E+08 AGTCAATGACACA          | -    | 365  | -     | -                        | 0.345 Validation | Haem_ATL_49 |
| IRF2BP2 | nonsynonymous SNV      | NM_182972        | c.G715A            | p.A239T           | 1          | 2.35E+08 | 2.35E+08 C                      | T    | 84   | -     | -                        | 0.348 Validation | Haem_ATL_49 |
| IRF2BP2 | nonsynonymous SNV      | NM_182972        | c.G532C            | p.E318R           | 1          | 2.35E+08 | 2.35E+08 C                      | T    | 79   | -     | -                        | 0.265 Validation | Haem_ATL_49 |
| CCR4    | stopgain               | NM_005508        | c.C987A            | p.C329X           | 3          | 32995901 | 32995901 C                      | A    | 800  | -     | -                        | 0.301 Validation | Haem_ATL_49 |
| TBL1XR1 | nonframeshift deletion | NM_024665        | c.865_873del       | p.289_291del      | 3          | 1.77E+08 | 1.77E+08 AATTGATGCTGAGATATAAAGG | -    | 867  | -     | -                        | 0.125 Validation | Haem_ATL_49 |
| TBL1XR1 | splicing               | NM_024665        | c.767-1G>A         | NA                | 3          | 1.77E+08 | 1.77E+08 C                      | T    | 333  | -     | -                        | 0.511 Validation | Haem_ATL_49 |
| CSNK1A1 | nonsynonymous SNV      | NM_001892        | c.G292A            | p.E98K            | 5          | 1.49E+08 | 1.49E+08 C                      | T    | 480  | -     |                          |                  |             |

**Supplemental Table 2. Somatic mutations detected by targeted capture sequencing in 183 ATL cases**

| Gene            | Type of mutation       | Accession number | Base change      | Amino acid change | Chromosome | Start    | End                               | Ref | Alt  | Depth | Variant allele frequency | Cohort     | Case ID     |
|-----------------|------------------------|------------------|------------------|-------------------|------------|----------|-----------------------------------|-----|------|-------|--------------------------|------------|-------------|
| <i>PLCG1</i>    | nonsynonymous SNV      | NM_002660        | c.G2120A         | p.R707Q           | 20         | 39795235 | 39795235 G                        | A   | 451  | -     | 0.497                    | Validation | Haem_ATL_55 |
| <i>CCR4</i>     | stopgain               | NM_005508        | c.C993A          | p.Y331X           | 3          | 32995907 | 32995907 C                        | A   | 898  | -     | 0.35                     | Validation | Haem_ATL_56 |
| <i>CARD11</i>   | nonsynonymous SNV      | NM_032415        | c.T2705G         | p.F902C           | 7          | 2955005  | 2955005 A                         | C   | 354  | -     | 0.703                    | Validation | Haem_ATL_56 |
| <i>CDKN2A</i>   | stopgain               | NM_000077        | c.C238T          | p.R80X            | 9          | 21971120 | 21971120 G                        | A   | 1319 | -     | 0.847                    | Validation | Haem_ATL_56 |
| <i>ZEB1</i>     | stopgain               | NM_030751        | c.C2227T         | p.Q743X           | 10         | 31810490 | 31810490 C                        | T   | 824  | -     | 0.283                    | Validation | Haem_ATL_56 |
| <i>CCR7</i>     | stopgain               | NM_001838        | c.C1060T         | p.Q354X           | 17         | 38711071 | 38711071 G                        | A   | 494  | -     | 0.316                    | Validation | Haem_ATL_56 |
| <i>PLCG1</i>    | nonframeshift deletion | NM_002660        | c.3502_3507del   | p.1168_1169del    | 20         | 39802399 | 39802404 GTGGAC                   | -   | 1409 | -     | 0.571                    | Validation | Haem_ATL_56 |
| <i>YHDF2</i>    | frameshift deletion    | NM_016258        | c.1445_1447del   | p.L481fs          | 1          | 29070225 | 29070226 AT                       | -   | 1006 | -     | 0.36                     | Validation | Haem_ATL_57 |
| <i>PRKCB</i>    | nonsynonymous SNV      | NM_002738        | c.G1279A         | p.D427N           | 16         | 24183630 | 24183630 G                        | A   | 580  | -     | 0.409                    | Validation | Haem_ATL_57 |
| <i>TP53</i>     | nonsynonymous SNV      | NM_000546        | c.G856A          | p.E286K           | 17         | 7577082  | 7577082 C                         | T   | 423  | -     | 0.624                    | Validation | Haem_ATL_57 |
| <i>CARD11</i>   | nonsynonymous SNV      | NM_032415        | c.C1852G         | p.S618A           | 7          | 2963955  | 2963955 A                         | C   | 360  | -     | 0.156                    | Validation | Haem_ATL_58 |
| <i>PRKCB</i>    | nonsynonymous SNV      | NM_002738        | c.G1279A         | p.D427N           | 16         | 24183630 | 24183630 G                        | A   | 483  | -     | 0.07                     | Validation | Haem_ATL_58 |
| <i>PRKCB</i>    | nonsynonymous SNV      | NM_002738        | c.G1408C         | p.D470H           | 16         | 24192124 | 24192124 G                        | C   | 598  | -     | 1.02                     | Validation | Haem_ATL_58 |
| <i>PLCG1</i>    | nonsynonymous SNV      | NM_002660        | c.C142T          | p.R48W            | 20         | 39766423 | 39766423 C                        | T   | 868  | -     | 0.282                    | Validation | Haem_ATL_58 |
| <i>PLCG1</i>    | nonsynonymous SNV      | NM_002660        | c.G3493C         | p.D1165H          | 20         | 39802390 | 39802390 G                        | C   | 613  | -     | 0.233                    | Validation | Haem_ATL_58 |
| <i>CBLB</i>     | stopgain               | NM_170662        | c.C112T          | p.Q38X            | 3          | 1.06E+08 | 1.06E+08 G                        | A   | 949  | -     | 0.413                    | Validation | Haem_ATL_59 |
| <i>TBL1XR1</i>  | stopgain               | NM_024665        | c.A21delA        | p.H141X           | 3          | 1.77E+08 | 1.77E+08 T                        | -   | 971  | -     | 0.878                    | Validation | Haem_ATL_59 |
| <i>TBL1XR1</i>  | nonsynonymous SNV      | NM_024665        | c.A421T          | p.I41L            | 3          | 1.77E+08 | 1.77E+08 T                        | A   | 94   | -     | 0.128                    | Validation | Haem_ATL_59 |
| <i>HLA-B</i>    | splicing               | NM_005514        | c.G19-1G>A       | NA                | 6          | 31323943 | 31323943 C                        | T   | 355  | -     | 0.831                    | Validation | Haem_ATL_59 |
| <i>HLA-B</i>    | stopgain               | NM_005514        | c.G470A          | p.W157X           | 6          | 31324093 | 31324093 C                        | A   | 564  | -     | 0.172                    | Validation | Haem_ATL_59 |
| <i>CARD11</i>   | nonsynonymous SNV      | NM_032415        | c.C1865A         | p.S622Y           | 7          | 2963942  | 2963942 G                         | T   | 841  | -     | 0.29                     | Validation | Haem_ATL_59 |
| <i>CARD11</i>   | nonsynonymous SNV      | NM_032415        | c.T1864C         | p.S622P           | 7          | 2963943  | 2963943 A                         | G   | 837  | -     | 0.293                    | Validation | Haem_ATL_59 |
| <i>CARD11</i>   | nonsynonymous SNV      | NM_032415        | c.G1404C         | p.R468S           | 7          | 2974201  | 2974201 C                         | G   | 1030 | -     | 0.35                     | Validation | Haem_ATL_59 |
| <i>NOTCH1</i>   | frameshift deletion    | NM_017617        | c.7541_7542del   | p.P2514fs         | 9          | 1.39E+08 | 1.39E+08 AG                       | -   | 858  | -     | 0.388                    | Validation | Haem_ATL_59 |
| <i>GATA3</i>    | frameshift insertion   | NM_002051        | c.1302dupC       | p.H434fs          | 10         | 8115955  | 8115955 G                         | C   | 984  | -     | 0.383                    | Validation | Haem_ATL_59 |
| <i>PRKCB</i>    | nonsynonymous SNV      | NM_002738        | c.G1279A         | p.D427N           | 16         | 24183630 | 24183630 G                        | A   | 684  | -     | 0.466                    | Validation | Haem_ATL_59 |
| <i>TP53</i>     | nonsynonymous SNV      | NM_000546        | c.L658C          | p.Y220H           | 17         | 7578191  | 7578191 A                         | G   | 894  | -     | 0.427                    | Validation | Haem_ATL_59 |
| <i>TBL1XR1</i>  | nonsynonymous SNV      | NM_024665        | c.C931C          | p.A311P           | 3          | 1.77E+08 | 1.77E+08 C                        | G   | 320  | -     | 0.179                    | Validation | Haem_ATL_60 |
| <i>GPR183</i>   | stopgain               | NM_040951        | c.C259T          | p.R877X           | 13         | 99948141 | 99948141 G                        | A   | 509  | -     | 0.475                    | Validation | Haem_ATL_60 |
| <i>PRKCB</i>    | nonsynonymous SNV      | NM_002738        | c.G1279A         | p.D427N           | 16         | 24183630 | 24183630 G                        | A   | 355  | -     | 0.039                    | Validation | Haem_ATL_60 |
| <i>CD58</i>     | nonsynonymous SNV      | NM_001779        | c.G628A          | p.G210S           | 1          | 1.17E+08 | 1.17E+08 C                        | T   | 359  | -     | 0.844                    | Validation | Haem_ATL_61 |
| <i>CCR4</i>     | stopgain               | NM_005508        | c.C993A          | p.Y331X           | 3          | 32995907 | 32995907 C                        | A   | 2156 | -     | 0.652                    | Validation | Haem_ATL_61 |
| <i>TBL1XR1</i>  | nonsynonymous SNV      | NM_024665        | c.G1122T         | p.K374N           | 3          | 1.77E+08 | 1.77E+08 C                        | A   | 1398 | -     | 0.927                    | Validation | Haem_ATL_61 |
| <i>HLA-B</i>    | nonframeshift deletion | NM_005514        | c.379_402del     | p.127_134del      | 6          | 31324161 | 31324184 GAGGAGGGCCCGCTCCGGCCCCAC | -   | 876  | -     | 0.187                    | Validation | Haem_ATL_61 |
| <i>FN1</i>      | nonsynonymous SNV      | NM_002037        | c.A1592G         | p.Y531C           | 6          | 1.12E+08 | 1.12E+08 T                        | C   | 772  | -     | 0.03                     | Validation | Haem_ATL_61 |
| <i>CCR7</i>     | stopgain               | NM_001838        | c.C1060T         | p.Q354X           | 17         | 38711071 | 38711071 G                        | A   | 1260 | -     | 0.457                    | Validation | Haem_ATL_61 |
| <i>ZNFX38</i>   | stopgain               | NM_014497        | c.G1432T         | p.E475X           | 2          | 71591088 | 71591088 G                        | T   | 589  | -     | 0.149                    | Validation | Haem_ATL_62 |
| <i>CCR4</i>     | nonsynonymous SNV      | NM_005508        | c.C1060T         | p.Q354X           | 3          | 32995920 | 32995920 C                        | T   | 728  | -     | 0.563                    | Validation | Haem_ATL_62 |
| <i>STAT3</i>    | nonsynonymous SNV      | NM_001350        | c.A1919T         | p.F640F           | 17         | 40474482 | 40474482 T                        | A   | 605  | -     | 0.17                     | Validation | Haem_ATL_62 |
| <i>CARD11</i>   | nonsynonymous SNV      | NM_032415        | c.T389G          | p.F130C           | 7          | 2984141  | 2984141 A                         | C   | 562  | -     | 0.214                    | Validation | Haem_ATL_63 |
| <i>HNRNP2B1</i> | splicing               | NM_031243        | c.7-2>C          | NA                | 7          | 26237488 | 26237488 -                        | G   | 393  | -     | 0.359                    | Validation | Haem_ATL_63 |
| <i>TP53</i>     | stopgain               | NM_000546        | c.C406T          | p.Q136X           | 17         | 7578524  | 7578524 G                         | A   | 624  | -     | 0.482                    | Validation | Haem_ATL_63 |
| <i>PLCG1</i>    | nonsynonymous SNV      | NM_002660        | c.C1034T         | p.S345F           | 20         | 39792584 | 39792584 C                        | T   | 925  | -     | 0.328                    | Validation | Haem_ATL_63 |
| <i>CD58</i>     | frameshift deletion    | NM_001779        | c.642_643del     | p.H214fs          | 1          | 1.17E+08 | 1.17E+08 TG                       | -   | 770  | -     | 0.178                    | Validation | Haem_ATL_65 |
| <i>IRF2BP2</i>  | nonsynonymous SNV      | NM_182972        | c.G581A          | p.G194D           | 1          | 2.35E+08 | 2.35E+08 C                        | T   | 361  | -     | 0.244                    | Validation | Haem_ATL_65 |
| <i>CCR4</i>     | stopgain               | NM_005508        | c.C993G          | p.Y331X           | 3          | 32995907 | 32995907 C                        | G   | 1195 | -     | 0.299                    | Validation | Haem_ATL_65 |
| <i>IRF4</i>     | nonsynonymous SNV      | NM_002460        | c.C208G          | p.L70V            | 6          | 393360   | 393360 C                          | G   | 336  | -     | 0.045                    | Validation | Haem_ATL_65 |
| <i>ATXN1</i>    | nonsynonymous SNV      | NM_000332        | c.T1823A         | p.L608Q           | 6          | 16326719 | 16326719 A                        | T   | 864  | -     | 0.07                     | Validation | Haem_ATL_65 |
| <i>CARD11</i>   | nonsynonymous SNV      | NM_032415        | c.G2203A         | p.E735K           | 7          | 2962334  | 2962334 C                         | T   | 652  | -     | 0.07                     | Validation | Haem_ATL_65 |
| <i>CARD11</i>   | nonsynonymous SNV      | NM_032415        | c.T1852G         | p.S618A           | 7          | 2963955  | 2963955 A                         | C   | 671  | -     | 0.323                    | Validation | Haem_ATL_65 |
| <i>CARD11</i>   | nonsynonymous SNV      | NM_032415        | c.A761C          | p.K254T           | 7          | 2979486  | 2979486 T                         | G   | 951  | -     | 0.066                    | Validation | Haem_ATL_65 |
| <i>B2M</i>      | frameshift deletion    | NM_004048        | c.136_137del     | p.Y46fs           | 15         | 45007689 | 45007690 TA                       | -   | 911  | -     | 0.239                    | Validation | Haem_ATL_65 |
| <i>CCR4</i>     | frameshift insertion   | NM_005508        | c.967dupA        | p.C322fs          | 3          | 32995880 | 32995880 -                        | A   | 2160 | -     | 0.406                    | Validation | Haem_ATL_66 |
| <i>IRF4</i>     | nonsynonymous SNV      | NM_002460        | c.G341A          | p.S114N           | 6          | 394945   | 394945 G                          | A   | 1061 | -     | 0.608                    | Validation | Haem_ATL_66 |
| <i>VAV1</i>     | nonsynonymous SNV      | NM_005428        | c.A1211G         | p.K404R           | 19         | 6828857  | 6828857 A                         | G   | 1325 | -     | 0.281                    | Validation | Haem_ATL_66 |
| <i>CBLB</i>     | nonsynonymous SNV      | NM_170662        | c.T1252G         | p.I375M           | 3          | 1.05E+08 | 1.05E+08 A                        | C   | 959  | -     | 0.355                    | Validation | Haem_ATL_67 |
| <i>GATA3</i>    | frameshift insertion   | NM_002051        | c.225_226insCGTA | p.Y75fs           | 10         | 8097843  | 8097843 CGTA                      | -   | 721  | -     | 0.51                     | Validation | Haem_ATL_67 |
| <i>PRKCB</i>    | nonsynonymous SNV      | NM_002738        | c.G1279A         | p.D427N           | 16         | 24183630 | 24183630 G                        | A   | 1081 | -     | 0.563                    | Validation | Haem_ATL_67 |
| <i>PRKCB</i>    | nonsynonymous SNV      | NM_002660        | c.C1034T         | p.S345F           | 20         | 39792584 | 39792584 C                        | T   | 1047 | -     | 0.444                    | Validation | Haem_ATL_67 |
| <i>CCR4</i>     | stopgain               | NM_005508        | c.C993A          | p.Y331X           | 3          | 32995907 | 32995907 C                        | A   | 1031 | -     | 0.444                    | Validation | Haem_ATL_68 |
| <i>TBL1XR1</i>  | nonsynonymous SNV      | NM_024665        | c.A1339C         | p.S447R           | 3          | 1.77E+08 | 1.77E+08 T                        | G   | 914  | -     | 0.397                    | Validation | Haem_ATL_68 |
| <i>CSNK1A1</i>  | nonsynonymous SNV      | NM_001892        | c.C592G          | p.Q198E           | 5          | 1.49E+08 | 1.49E+08 G                        | C   | 825  | -     | 0.69                     | Validation | Haem_ATL_68 |
| <i>PRKCB</i>    | nonsynonymous SNV      | NM_002738        | c.G1279A         | p.D427N           | 16         | 24183630 | 24183630 G                        | A   | 743  | -     | 0.452                    | Validation | Haem_ATL_68 |
| <i>STAT3</i>    | nonsynonymous SNV      | NM_001350        | c.G1981C         | p.D661H           | 17         | 40474420 | 40474420 C                        | G   | 962  | -     | 0.035                    | Validation | Haem_ATL_68 |
| <i>VAV1</i>     | nonsynonymous SNV      | NM_005428        | c.A524T          | p.E175V           | 19         | 6822306  | 6822306 A                         | T   | 371  | -     | 0.035                    | Validation | Haem_ATL_68 |
| <i>PLCG1</i>    | nonsynonymous SNV      | NM_002660        | c.A2248G         | p.M790V           | 20         | 39795446 | 39795446 A                        | G   | 765  | -     | 0.027                    | Validation | Haem_ATL_68 |
| <i>PLCG1</i>    | nonsynonymous SNV      | NM_002660        | c.A3047T         | p.Q1016L          | 20         | 39801202 | 39801202 C                        | T   | 821  | -     | 0.05                     | Validation | Haem_ATL_68 |
| <i>GATA3</i>    | splicing               | NM_002051        | c.G30A           | p.W10X            | 10         | 8097648  | 8097648 G                         | A   | 646  | -     | 0.475                    | Validation | Haem_ATL_69 |
| <i>GATA3</i>    | splicing               | NM_002051        | c.778-1G>A       | NA                | 10         | 8100805  | 8100805 G                         | A   | 1249 | -     | 0.479                    | Validation | Haem_ATL_69 |
| <i>TP53</i>     | nonsynonymous SNV      | NM_000546        | c.T470G          | p.V157G           | 17         | 7578460  | 7578460 A                         | C   | 1177 | -     | 0.962                    | Validation | Haem_ATL_69 |
| <i>CCR4</i>     | stopgain               | NM_005508        | c.C993A          | p.Y331X           | 3          | 32995907 | 32995907 C                        | A   | 1638 | -     | 0.4                      | Validation | Haem_ATL_70 |
| <i>PRKCB</i>    | nonsynonymous SNV      | NM_002738        | c.G1597A         | p.E533K           | 16         | 24196495 | 24196495 G                        | A   | 925  | -     | 0.316                    | Validation | Haem_ATL_70 |
| <i>CSNK2A1</i>  | stopgain               | NM_001895        | c.G647A          | p.W216X           | 20         | 470500   | 470500 C                          | T   | 996  | -     | 0.238                    | Validation | Haem_ATL_70 |
| <i>PLCG1</i>    | nonsynonymous SNV      | NM_002660        | c.G3487A         | p.E1163K          | 20         | 39802384 | 39802384 G                        | A   | 1318 | -     | 0.064                    | Validation | Haem_ATL_70 |
| <i>PLCG1</i>    | nonsynonymous SNV      | NM_002660        | c.T3499A         | p.F1167I          | 20         | 39802396 | 39802396 T                        | A   | 1261 | -     | 0.141                    | Validation | Haem_ATL_70 |
| <i>IRF2BP2</i>  | nonsynonymous SNV      | NM_182972        | c.G753C          | p.Q251H           | 1          | 2.35E+08 | 2.35E+08 C                        | G   | 426  | -     | 0.312                    | Validation | Haem_ATL_71 |
| <i>CBLB</i>     | splicing               | NM_170662        | c.296-1G>G       | NA                | 3          | 1.05E+08 | 1.05E+08 C                        | C   | 300  | -     | 0.783                    | Validation | Haem_ATL_71 |
| <i>IRF4</i>     | nonsynonymous SNV      | NM_002460        | c.G358C          | p.D120H           | 6          | 394962   | 394962 G                          | C   | 407  | -     | 0.45                     | Validation | Haem_ATL_71 |
| <i>CSNK2B</i>   | stopgain               | NM_001320        | c.A529T          | p.K177X           | 6          | 31637257 | 31637257 A                        | T   | 427  | -     | 0.52                     | Validation | Haem_ATL_71 |
| <i>NOTCH1</i>   | stopgain               | NM_017617        | c.G7516T         | p.E2506X          | 9          | 1.39E+08 | 1.39E+08 C                        | A   | 525  | -     | 0.171                    | Validation | Haem_ATL_71 |
| <i>NOTCH1</i>   | frameshift deletion    | NM_017617        | c.7356_7362del   | p.A2452fs         | 9          | 1.39E+08 | 1.39E+08 GTGCCACC                 | -   | 402  | -     | 0.187                    | Validation | Haem_ATL_71 |
| <i>IDH2</i>     | nonsynonymous SNV      | NM_021668        | c.G515A          | p.R172K           | 15         | 90631838 | 90631838 C                        | T   | 439  | -     | 0.253                    | Validation | Haem_ATL_71 |
| <i>PRKCB</i>    | nonsynonymous SNV      | NM_002738        | c.G1279A         | p.D427N           | 16         | 24183630 | 24183630 G                        | A   | 430  | -     | 0.486                    | Validation | Haem_ATL_71 |
| <i>CCR4</i>     | stopgain               | NM_005508        | c.C988T          | p.Q330X           | 3          | 32995902 | 32995902 C                        | T   | 1709 | -     | 0.784                    | Validation | Haem_ATL_72 |
| <i>TBL1XR1</i>  | nonsynonymous SNV      | NM_024665        | c.T965G          | p.F322C           | 3          | 1.77E+08 | 1.77E+08 A                        | C   | 1136 | -     | 0.378                    | Validation | Haem_ATL_72 |
| <i>TBL1XR1</i>  | stopgain               | NM_024665        | c.C313T          | p.Q105X           | 3          | 1.77E+08 | 1.77E+08 A                        | A   | 1557 | -     | 0.414                    | Validation | Haem_ATL_72 |
| <i>STAT3</i>    | nonsynonymous SNV      | NM_001350        | c.A3047T         | p.Q1016L          | 17         | 40475068 | 40475068 C                        | T   | 1040 | -     | 0.673                    | Validation | Haem_ATL_72 |
| <i>PLCG1</i>    | nonsynonymous SNV      | NM_002660        | c.C142T          | p.R48W            | 20         | 39       |                                   |     |      |       |                          |            |             |



Supplemental Table 2. Somatic mutations detected by targeted capture sequencing in 183 ATL cases

| Gene            | Type of mutation       | Accession number | Base change    | Amino acid change | Chromosome | Start    | End      | Ref             | Alt | Depth | Variant allele frequency | Cohort     | Case ID     |
|-----------------|------------------------|------------------|----------------|-------------------|------------|----------|----------|-----------------|-----|-------|--------------------------|------------|-------------|
| <i>PRKCB</i>    | nonsynonymous SNV      | NM_002738        | c.G1597A       | p.E533K           | 16         | 24196495 | 24196495 | G               | A   | 999   | 0.292                    | Validation | Haem_ATL_79 |
| <i>CCR7</i>     | stopgain               | NM_001838        | c.C1060T       | p.Q354X           | 17         | 38711071 | 38711071 | G               | A   | 1343  | 0.314                    | Validation | Haem_ATL_79 |
| <i>CCR7</i>     | stopgain               | NM_001838        | c.C1051T       | p.Q351X           | 17         | 38711080 | 38711080 | G               | A   | 1370  | 0.074                    | Validation | Haem_ATL_79 |
| <i>PLCG1</i>    | nonframeshift deletion | NM_002660        | c.3482_3496del | p.1161_1166del    | 20         | 39802379 | 39802393 | TGTATGAGGAAGACA | -   | 1531  | 0.197                    | Validation | Haem_ATL_79 |
| <i>CCR4</i>     | stopgain               | NM_005508        | c.C988T        | p.Q330X           | 3          | 32995902 | 32995902 | C               | T   | 1139  | 0.216                    | Validation | Haem_ATL_80 |
| <i>CDKN2A</i>   | stopgain               | NM_000077        | c.C238T        | p.R80X            | 9          | 21971120 | 21971120 | G               | A   | 590   | 0.044                    | Validation | Haem_ATL_80 |
| <i>PRKCB</i>    | nonsynonymous SNV      | NM_002738        | c.G1279A       | p.D427N           | 16         | 24183630 | 24183630 | G               | A   | 801   | 0.248                    | Validation | Haem_ATL_80 |
| <i>PLCG1</i>    | nonsynonymous SNV      | NM_002660        | c.G3487A       | p.E1163K          | 20         | 39802384 | 39802384 | G               | A   | 1163  | 0.411                    | Validation | Haem_ATL_80 |
| <i>CCR4</i>     | frameshift insertion   | NM_005508        | c.968dupG      | p.R323fs          | 3          | 32995881 | 32995881 | -               | G   | 1807  | 0.356                    | Validation | Haem_ATL_81 |
| <i>CSNK1A1</i>  | nonsynonymous SNV      | NM_001892        | c.G86A         | p.G29E            | 5          | 149E+08  | 149E+08  | C               | T   | 1141  | 0.387                    | Validation | Haem_ATL_81 |
| <i>CSNK2B</i>   | nonframeshift deletion | NM_001320        | c.569_571del   | p.190_191del      | 6          | 31637624 | 31637626 | TCA             | -   | 1210  | 0.36                     | Validation | Haem_ATL_81 |
| <i>POT1</i>     | stopgain               | NM_015450        | c.G226T        | p.G76X            | 7          | 1.25E+08 | 1.25E+08 | C               | A   | 1656  | 0.571                    | Validation | Haem_ATL_81 |
| <i>FAS</i>      | frameshift deletion    | NM_000043        | c.63_66del     | p.K21fs           | 10         | 90762818 | 90762821 | AAGT            | -   | 3369  | 0.254                    | Validation | Haem_ATL_81 |
| <i>FAS</i>      | nonsynonymous SNV      | NM_000043        | c.G67T         | p.V23F            | 10         | 90762822 | 90762822 | G               | T   | 2727  | 0.276                    | Validation | Haem_ATL_81 |
| <i>FAS</i>      | splicing               | NM_000043        | c.677-2A>T     | NA                | 10         | 90773874 | 90773874 | A               | T   | 1187  | 0.129                    | Validation | Haem_ATL_81 |
| <i>PRKCB</i>    | nonsynonymous SNV      | NM_002738        | c.G1279A       | p.D427N           | 16         | 24183630 | 24183630 | G               | A   | 1370  | 0.55                     | Validation | Haem_ATL_81 |
| <i>PLCG1</i>    | nonframeshift deletion | NM_002660        | c.3482_3496del | p.1161_1166del    | 20         | 39802379 | 39802393 | TGTATGAGGAAGACA | -   | 1699  | 0.249                    | Validation | Haem_ATL_81 |
| <i>PLCG1</i>    | nonsynonymous SNV      | NM_002660        | c.T3501G       | p.F1167L          | 20         | 39802398 | 39802398 | T               | G   | 1294  | 0.321                    | Validation | Haem_ATL_81 |
| <i>CCR4</i>     | stopgain               | NM_005508        | c.C993G        | p.Y331X           | 3          | 32995907 | 32995907 | C               | G   | 1488  | 0.304                    | Validation | Haem_ATL_82 |
| <i>STAT3</i>    | nonsynonymous SNV      | NM_003150        | c.G1981T       | p.D661Y           | 17         | 40474420 | 40474420 | C               | A   | 1150  | 0.404                    | Validation | Haem_ATL_82 |
| <i>VAV1</i>     | nonsynonymous SNV      | NM_005428        | c.A1211G       | p.K404R           | 19         | 6828857  | 6828857  | A               | G   | 1088  | 0.851                    | Validation | Haem_ATL_82 |
| <i>PLCG1</i>    | nonsynonymous SNV      | NM_002660        | c.C2617T       | p.R873W           | 20         | 39798133 | 39798133 | C               | T   | 664   | 0.474                    | Validation | Haem_ATL_82 |
| <i>PLCG1</i>    | nonsynonymous SNV      | NM_002660        | c.G3487A       | p.E1163K          | 20         | 39802384 | 39802384 | G               | A   | 1103  | 0.423                    | Validation | Haem_ATL_82 |
| <i>HNRNP2B1</i> | stopgain               | NM_002137        | c.G964T        | p.G322X           | 7          | 26232871 | 26232871 | C               | A   | 921   | 0.244                    | Validation | Haem_ATL_83 |
| <i>PLCG1</i>    | nonsynonymous SNV      | NM_002660        | c.G3487A       | p.E1163K          | 20         | 39802384 | 39802384 | G               | A   | 1109  | 0.256                    | Validation | Haem_ATL_83 |
| <i>CCR4</i>     | frameshift deletion    | NM_005508        | c.538_547del   | p.T180fs          | 3          | 32995452 | 32995461 | ACTGAGCGCA      | -   | 914   | 0.316                    | Validation | Haem_ATL_84 |
| <i>PRKCB</i>    | nonsynonymous SNV      | NM_002738        | c.A1637T       | p.E546V           | 16         | 24196803 | 24196803 | A               | T   | 616   | 0.494                    | Validation | Haem_ATL_84 |

**Supplemental Table 3. Clinical variables and risk factors associated with gene mutations (p < 0.05 in uncorrected analyses).**

| Clinical variable/ risk factor         | Gene          | Mutation frequency [vs no risk factor] | p     | Corrected p* |
|----------------------------------------|---------------|----------------------------------------|-------|--------------|
| Sex (male gender)                      | NA            |                                        |       |              |
| Subtype (acute or unfavorable chronic) | NA            |                                        |       |              |
| Stage 3–4                              | NA            |                                        |       |              |
| ECOG PS 2–4                            | <i>TET2</i>   | 4 (23.5) [4 (4.9)]                     | 0.038 | 0.684        |
| Alb < 3.5 g/dL                         | <i>VAV1</i>   | 15 (33.3) [5 (9.3)]                    | 0.007 | 0.126        |
|                                        | <i>IRF4</i>   | 15 (33.3) [7 (13.0)]                   | 0.029 | 0.522        |
| cCa ≥ 11 mg/dL                         | <i>PRKCB</i>  | 10 (62.5) [19 (22.9)]                  | 0.004 | 0.072        |
|                                        | <i>VAV1</i>   | 8 (50.0) [12 (14.5)]                   | 0.004 | 0.072        |
| sIL-2R ≥ 20000 U/mL                    | <i>TBLXR1</i> | 5 (11.1) [16 (29.6)]                   | 0.046 | 0.828        |
| CRP ≥ 2.5 mg/dL                        | <i>VAV1</i>   | 8 (40.0) [12 (15.2)]                   | 0.031 | 0.558        |
| ATL-PI high- or intermediate-risk      | <i>VAV1</i>   | 19 (31.1) [1 (2.6)]                    | 0.001 | 0.018        |

\*Correction for multiple testing by Bonferroni–Holm. NA, not applicable, indicates that no genes were associated with that clinical variable/risk factor at p < 0.05 in uncorrected analyses; ECOG, Eastern Cooperative Oncology Group; PS, Performance Status; ATL-PI, Adult T-cell leukemia/lymphoma prognostic index.

**Supplemental Table 4. Elastic-net coefficients of ATL-PI risk categories and mutation status in 13 genes.**

| Variable                     | Elastic-net coefficient |
|------------------------------|-------------------------|
| <b>Clinical risk factors</b> |                         |
| ATL-PI high-risk             | 1.053                   |
| ATL-PI intermediate-risk     | 0                       |
| ATL-PI low-risk              | -0.363                  |
| <b>Genetic risk factors</b>  |                         |
| <i>TP53</i> mutation         | 0.413                   |
| <i>IRF4</i> mutation         | 0.263                   |
| <i>RHOA</i> mutation         | 0.109                   |
| <i>PRKCB</i> mutation        | 0.079                   |
| <i>CARD11</i> mutation       | 0.056                   |
| <i>CCR4</i> mutation         | 0                       |
| <i>NOTCH1</i> mutation       | 0                       |
| <i>PLCG1</i> mutation        | 0                       |
| <i>STAT3</i> mutation        | 0                       |
| <i>TBL1XR1</i> mutation      | 0                       |
| <i>VAV1</i> mutation         | 0                       |
| <i>CCR7</i> mutation         | -0.195                  |
| <i>GATA3</i> mutation        | -0.252                  |

For the elastic-net penalized Cox regression, binarized ATL-PI risk categories and mutation status in 13 genes were used as variables. The elastic-net penalized Cox regression shrank coefficients and set those of one clinical and six genetic variables to zero, under the optimal parameters ( $\alpha = 0.22$ ,  $\lambda = 0.176$ ). The m7-ATLPI was then developed by integrating the remaining two clinical variables (ATL-PI high-risk and ATL-PI low-risk) and seven genetic variables (mutations in *TP53*, *IRF4*, *RHOA*, *PRKCB*, *CARD11*, *CCR7*, and *GATA3*). Variables were ordered by their coefficients. Abbreviations: ATL-PI, Adult T-cell leukemia/lymphoma prognostic index.

## Supplemental Figures

**Supplemental Figure 1**

**(A)**

**ATL patients treated at University of Miyazaki Hospital and Imamura General Hospital**

Aggressive-type ATL patients aged <70 with intensive chemotherapy

FFPE LN samples (2000-2015) (n = 20)      Peripheral blood and LN samples (2014-2017) (n = 43)

Our previous report (Kataoka et al. Blood 2018)  
 ATL patients diagnosed at two institutions from 2003 to 2014 and their sequencing data (n = 117)      ATL patients diagnosed at six institutions from 1993 to 2017 and their sequencing data (n = 109)

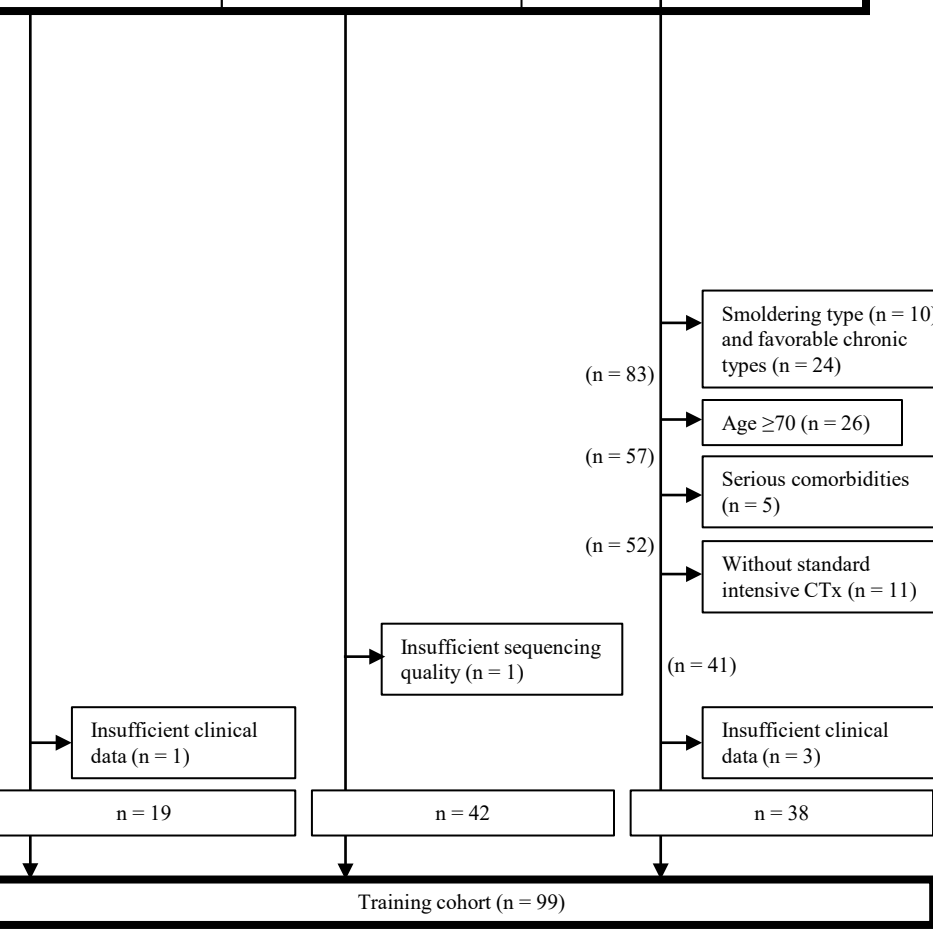

**(B)**

Excluding two institutions (n = 5)  
 ATL patients at the four institutions below (1994-2017) (n = 104).  
 - Kumamoto University Hospital (n = 52)  
 - Kagoshima University Hospital (n = 28)  
 - Nagasaki University Hospital (n = 17)  
 - Kyoto University Hospital (n = 7)

Aggressive-type ATL patients aged <70 years who were treated with intensive chemotherapy at the six institutions below (2006-2017) (n = 52)  
 - Kumamoto Medical Center (n = 13)  
 - Karatsu Red Cross Hospital (n = 9)  
 - Miyazaki Prefectural Miyazaki Hospital (n = 19)  
 - Koga General Hospital (n = 6)  
 - Miyazaki Prefectural Nobeoka Hospital (n = 4)  
 - Kyushu University Hospital (n = 1)

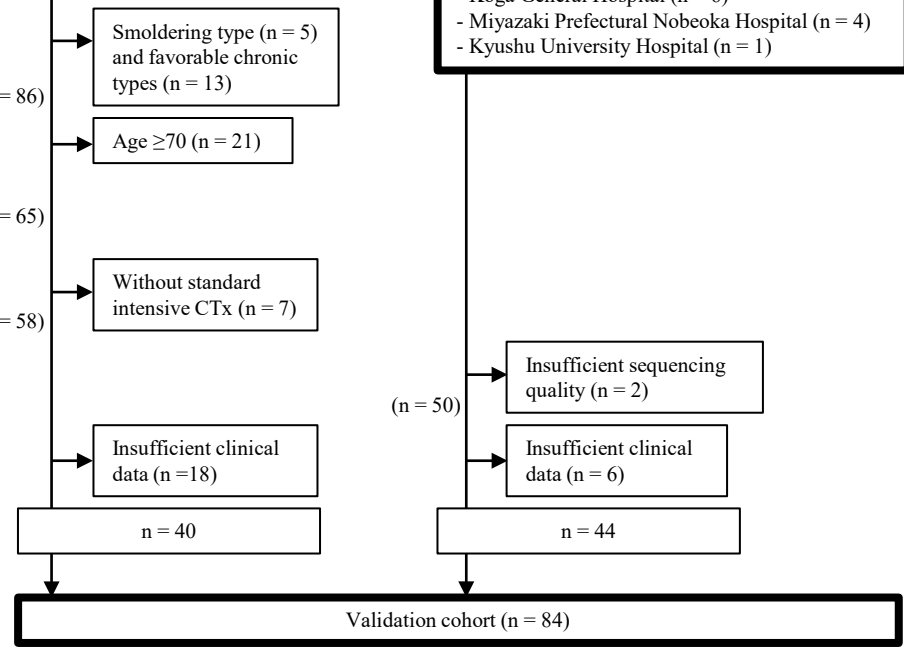

### **Supplemental Figure 1. Patient flow in this study.**

(A) Training cohort. Peripheral blood and LN samples (n = 43) and FFPE LN samples (n = 20) were obtained from aggressive-type ATL patients who were <70 years old and who received intensive chemotherapy and were analyzed by targeted sequencing in this study. The analysis also included 41 samples and their sequencing data from aggressive-type ATL patients in our previous study who were <70 years old and who received intensive chemotherapy; their clinical information, including outcomes, was updated<sup>3</sup>. Excluding samples with insufficient clinical data or sequencing quality, 99 samples were included in the training cohort. FFPE, formalin-fixed paraffin-embedded; LN, lymph node; CTx, chemotherapy.

(B) Validation cohort. Fifty-two samples were obtained from aggressive-type ATL patients who were <70 years old and who received intensive chemotherapy and were analyzed by targeted sequencing in this study. The analysis also included 58 samples and their sequencing data from aggressive-type ATL patients in our previous study who were <70 years old and who received intensive chemotherapy; their clinical information, including outcomes, was updated<sup>3</sup>. Excluding samples with insufficient clinical data or sequencing quality, 84 samples were included in the validation cohort.

**Supplemental Figure 2**

**(A)**

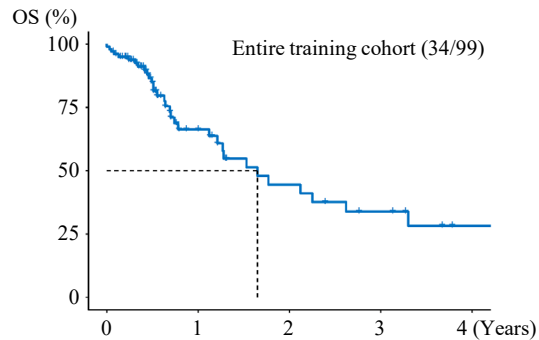

**Patients at risk**

|                        |    |    |    |   |   |
|------------------------|----|----|----|---|---|
| Entire training cohort | 99 | 26 | 13 | 8 | 3 |
|------------------------|----|----|----|---|---|

**(B)**

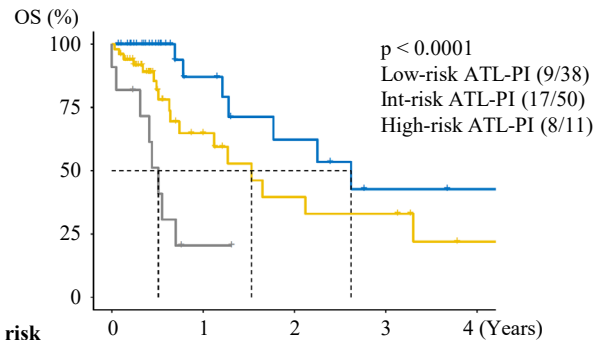

**Patients at risk**

|             |    |    |   |   |   |
|-------------|----|----|---|---|---|
| ATL-PI Low  | 38 | 12 | 7 | 3 | 2 |
| ATL-PI Int  | 50 | 13 | 6 | 5 | 1 |
| ATL-PI High | 11 | 1  | 0 | 0 | 0 |

**Supplemental Figure 2. Overall survival of the training cohort.**

(A) Kaplan-Meier OS curves of the entire training cohort.

(B) Kaplan-Meier OS curves of the training cohort stratified by ATL-PI category.

Numbers in parentheses show number of patients with events / number of patients per cohort.



**Supplemental Figure 3**

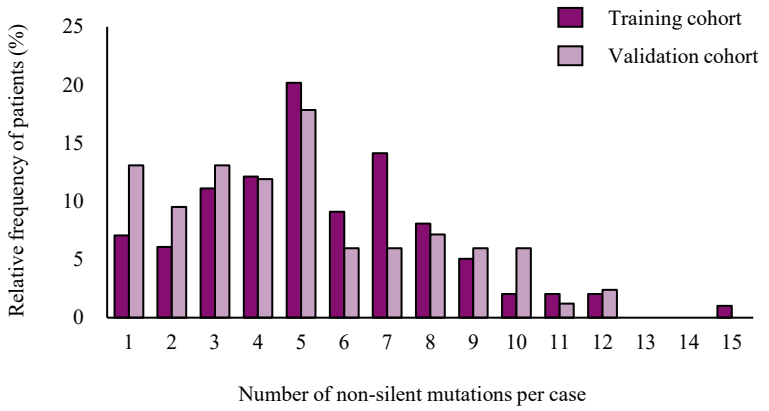

**Supplementary Figure 3. Distribution of cases in the training and validation cohorts by the number of genes with non-silent mutations.**

The median number of mutated genes determined by targeted sequencing in each patient was five (IQR 4–7) in the training cohort and five (IQR 3–7) in the validation cohort.

**Supplemental Figure 4**

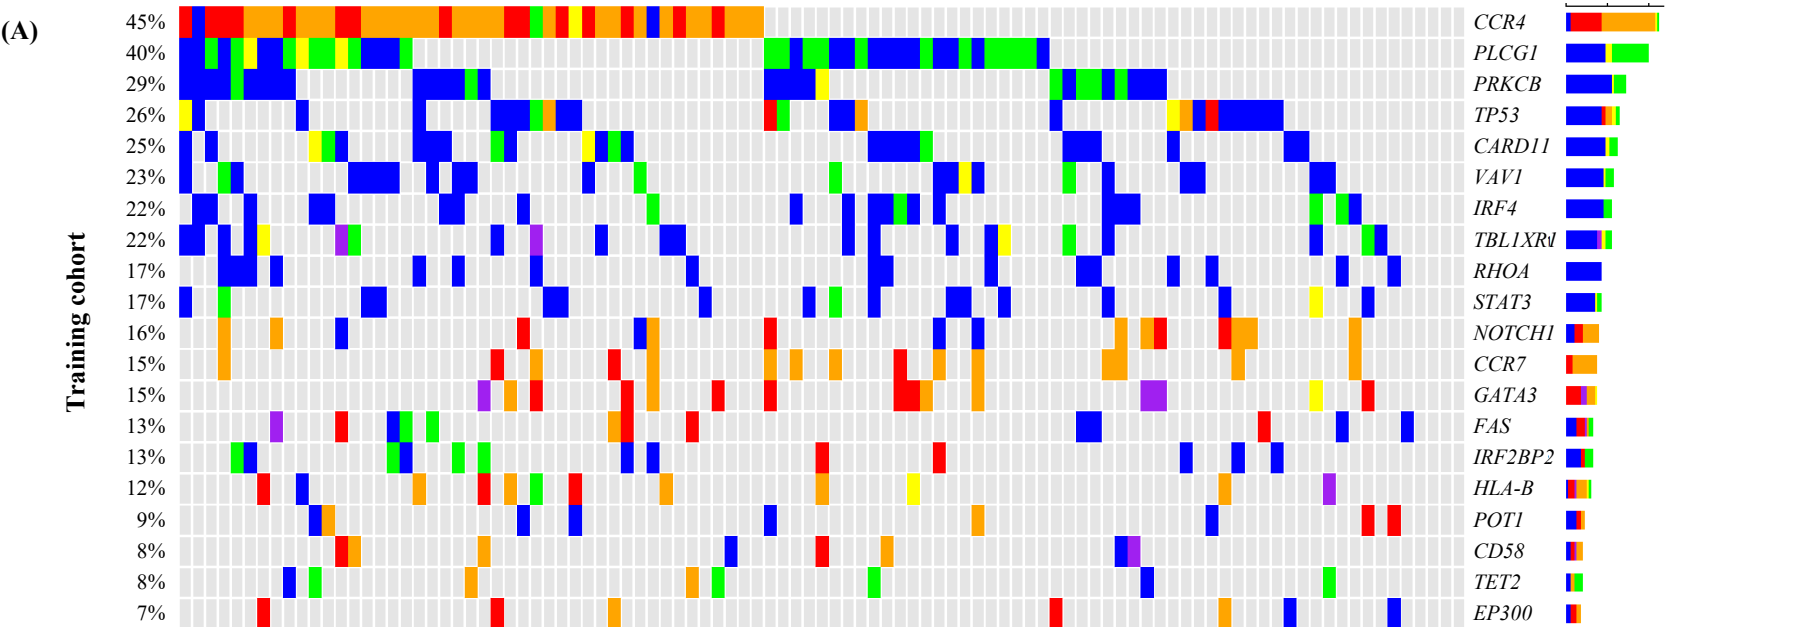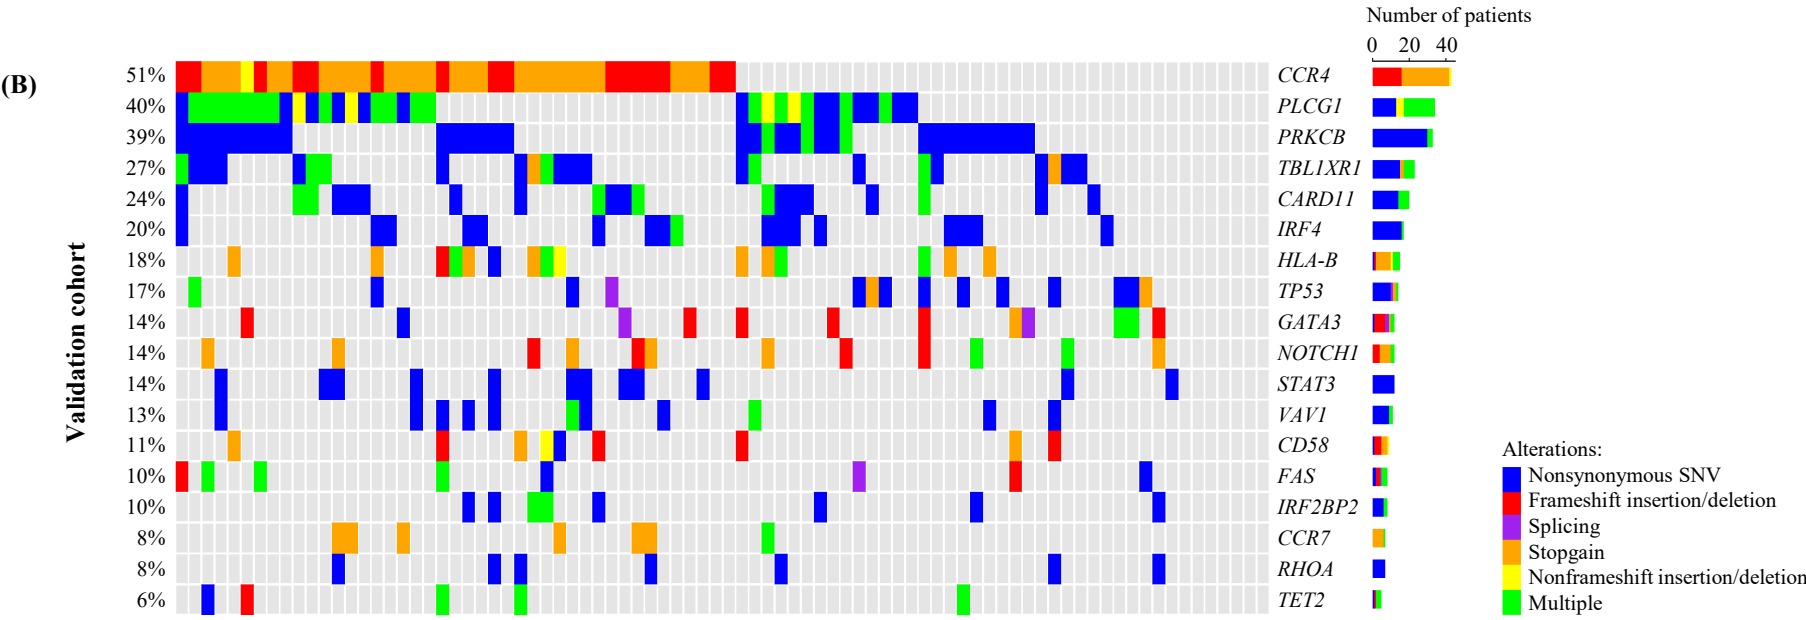

**Supplemental Figure 4. The targeted mutational landscape in the training and validation cohorts.**

(A) Mutation plot for 99 patients in the training cohort. Twenty mutated genes with non-silent mutations in >5% of cases are shown.

(B) Mutation plot for 84 patients in the validation cohort. Eighteen mutated genes with non-silent mutations in >5% of cases are shown.

Mutation types are color coded. For all genes, non-silent variants with variant allele frequencies >0.1 are shown. Genes are ordered by frequency. The predicted functional impact of missense mutations was determined by the Mutation Assessor tool. Mutation types are indicated in the graph legend.

Supplemental Figure 5

Training cohort

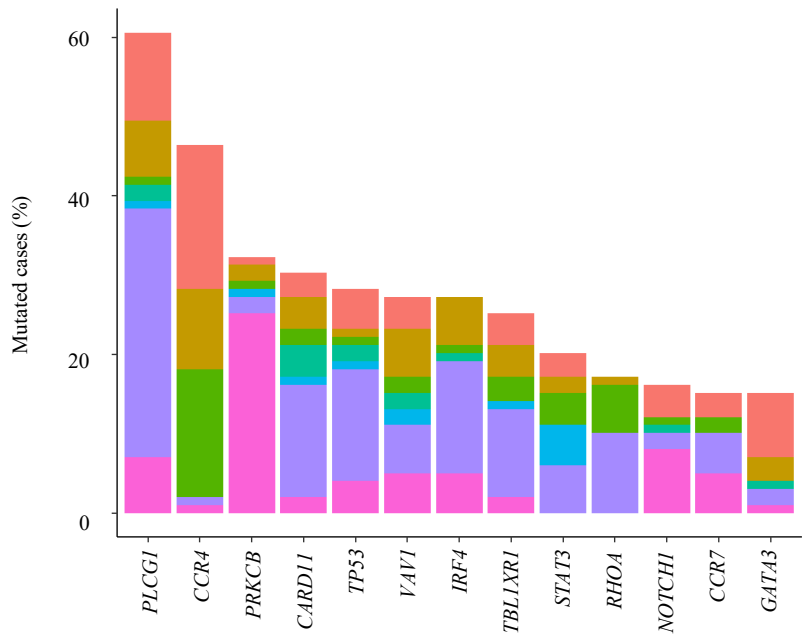

Validation cohort

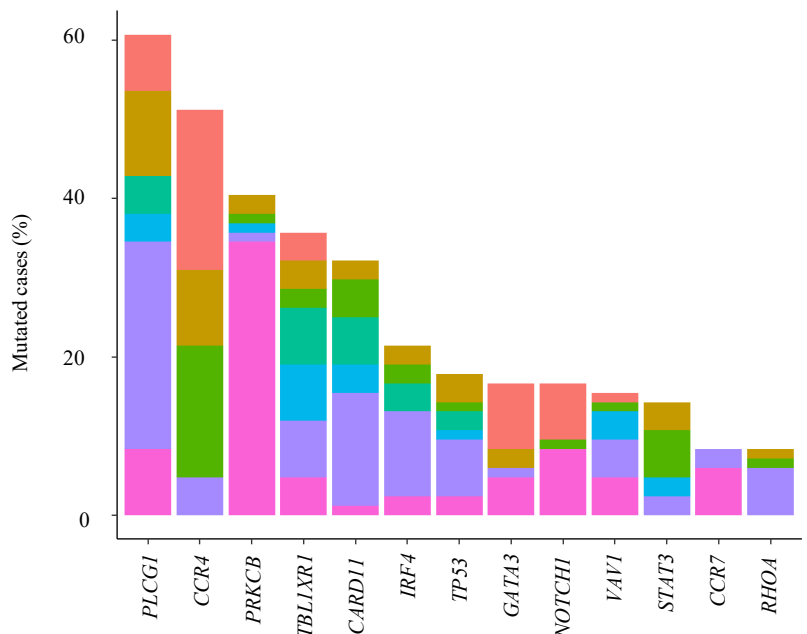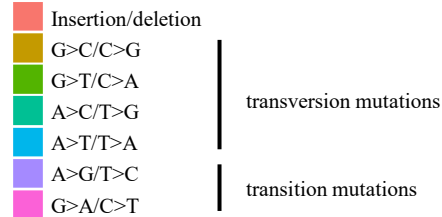

**Supplemental Figure 5. Frequencies of transitions, transversions, and small insertions/deletions in the training and validation cohorts.**

Types of alterations are indicated in the graph legend.

**Supplemental Figure 6**

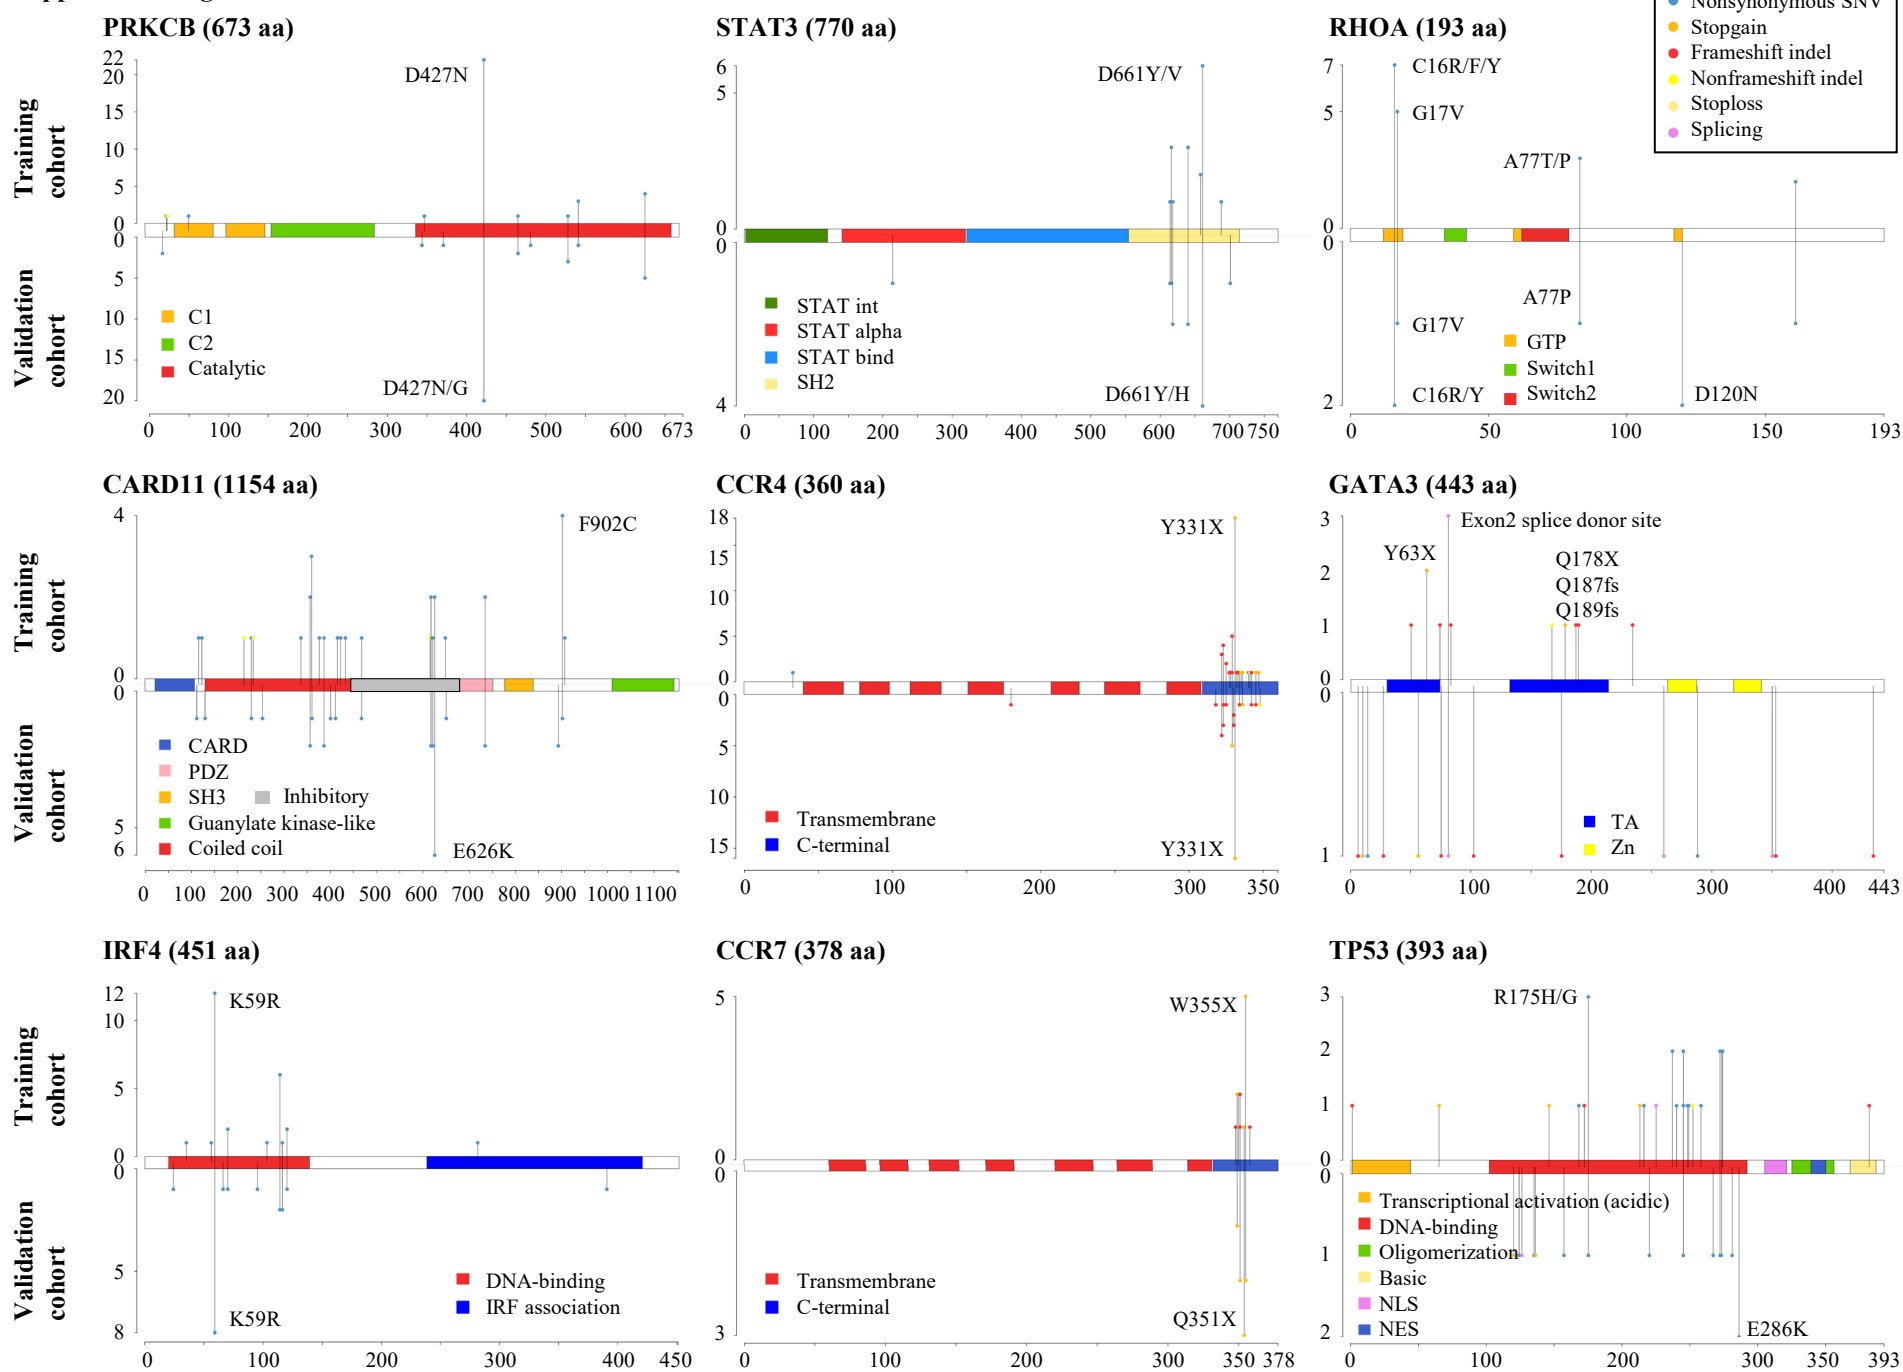

### **Supplemental Figure 6. Selected genes with hotspot mutations.**

Mutations in the training cohort are shown on top, and those in the validation cohort are shown below. Truncating mutations consist of nonsense, nonstop, frameshift deletion, frameshift insertion, and splice site mutations. In the training cohort, mutations in *PRKCB* were clustered at the catalytic domain (32 [91%] of 35). Many *CARD11* mutations were clustered in the coiled-coil domain (14 [45%] of 31) and inhibitory domain (8 [26%] of 31). Almost all *IRF4* mutations (26 [96%] of 27) were clustered in the DNA-binding domain, and all were missense mutations. All *STAT3* mutations (17 [100%] of 17) were clustered in the SH2 domain. Almost all *CCR4* and *CCR7* mutations (45 [98%] of 46; and 15 [100%] of 15) occurred in the cytoplasmic regions. Many *RHOA* mutations (12 [71%] of 17) were clustered in the guanosine triphosphate (GTP)-binding domain, as previously reported<sup>6</sup>. Many *GATA3* mutations (12 [92%] of 13) were clustered in the transactivation domain and were mostly frameshift or splicing mutations. Many *TP53* mutations were clustered in the DNA-binding domain (25 [89%] of 28). In the validation cohort, the mutations were similarly distributed.



**Supplemental Figure 7**

| Cohort            | Gene         | Univariate |      |       |             | Univariate adjusted for ATL-PI |         |      |       |             |
|-------------------|--------------|------------|------|-------|-------------|--------------------------------|---------|------|-------|-------------|
|                   |              | $\beta$    | HR   | p     | Corrected p | Gene                           | $\beta$ | HR   | p     | Corrected p |
| Training cohort   | <i>TP53</i>  | 0.65       | 1.92 | 0.077 | 1.000       | <i>TP53</i>                    | 0.75    | 2.11 | 0.044 | 0.843       |
| Validation cohort | <i>IRF4</i>  | 1.39       | 4.01 | 0.001 | 0.019       | <i>IRF4</i>                    | 1.30    | 3.65 | 0.002 | 0.092       |
|                   | <i>PRKCB</i> | 0.78       | 2.17 | 0.037 | 0.666       | <i>PRKCB</i>                   | 0.66    | 1.94 | 0.078 | 1.000       |

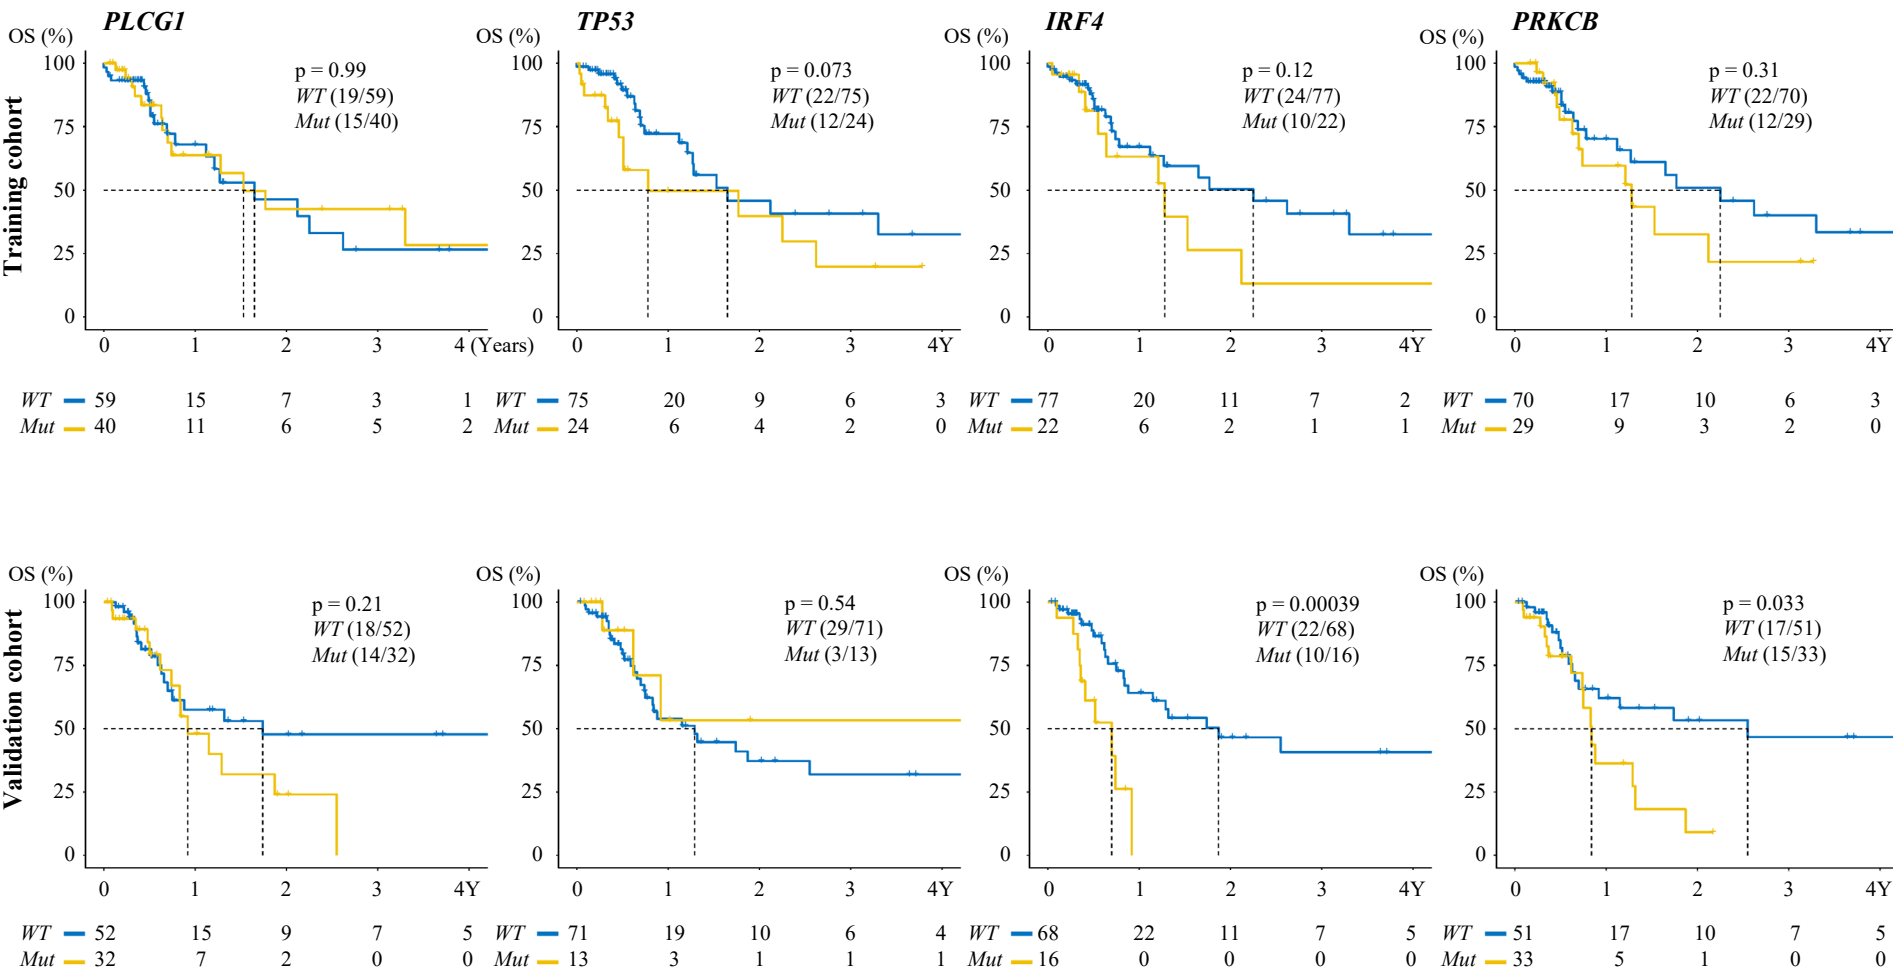

**Supplemental Figure 7. Kaplan-Meier curves for genetic variants that significantly affected OS in either cohort by univariate analysis with or without adjustment.**

A summary of unadjusted and adjusted univariable test results is shown. Multiple hypothesis correction was performed by the Bonferroni-Holm procedure. HR, hazard ratio; ATL-PI, adult T-cell leukemia/lymphoma prognostic index; *WT*, wild type; *Mut*, mutated. Numbers on Kaplan-Meier OS curves indicate number of patients with event / number of patients per cohort.

Supplemental Figure 8

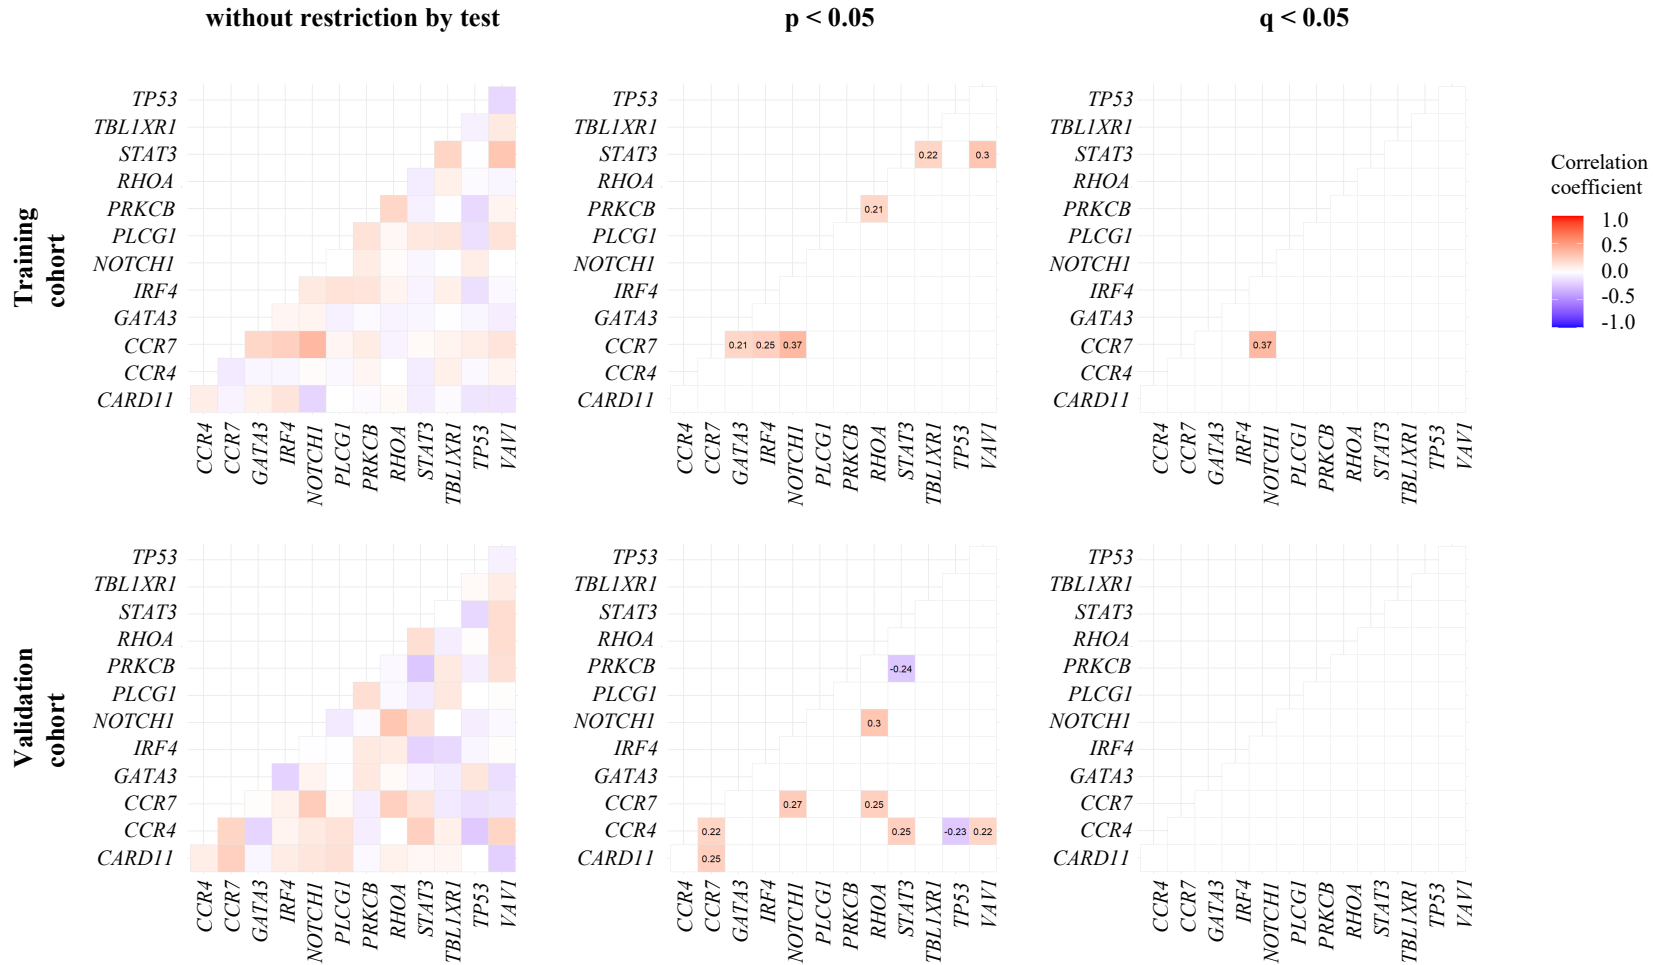

**Supplemental Figure 8. Correlation matrix analysis.**

A heatmap is shown of all Pearson's correlation coefficients for pairwise combinations of the 13 most commonly mutated genes in the training and validation cohorts.

Pearson's  $r$  correlation coefficients without restriction (left), with  $p < 0.05$  (middle), and with  $q < 0.05$  (right) are shown.

**Supplemental Figure 9**

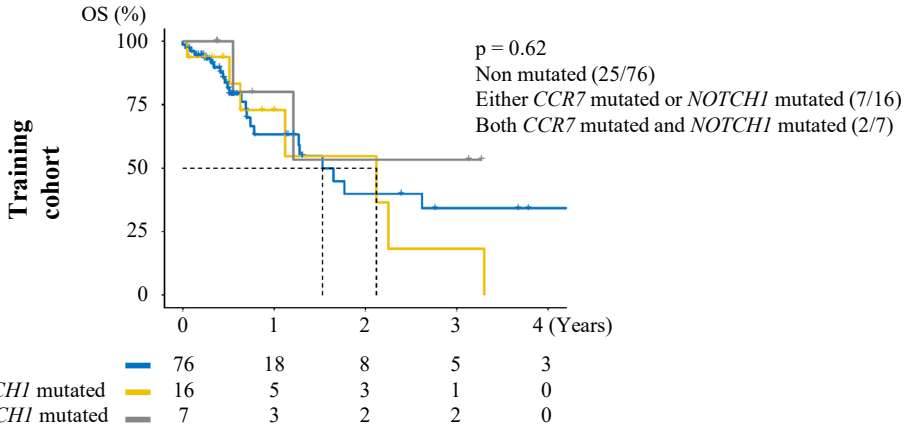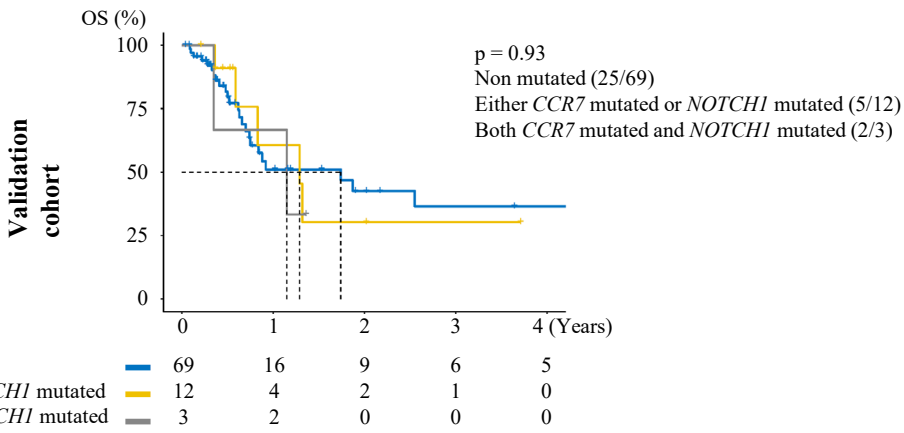

**Supplemental Figure 9. Kaplan-Meier curves classified by the status of mutational combinations in both cohorts.**

Survival curves classified by the status of the mutational combinations of *NOTCH1* and *CCR7* are shown. Numbers on Kaplan-Meier OS curves indicate number of patients with events / number of patients per cohort.

**Supplemental Figure 10**

**(A)**

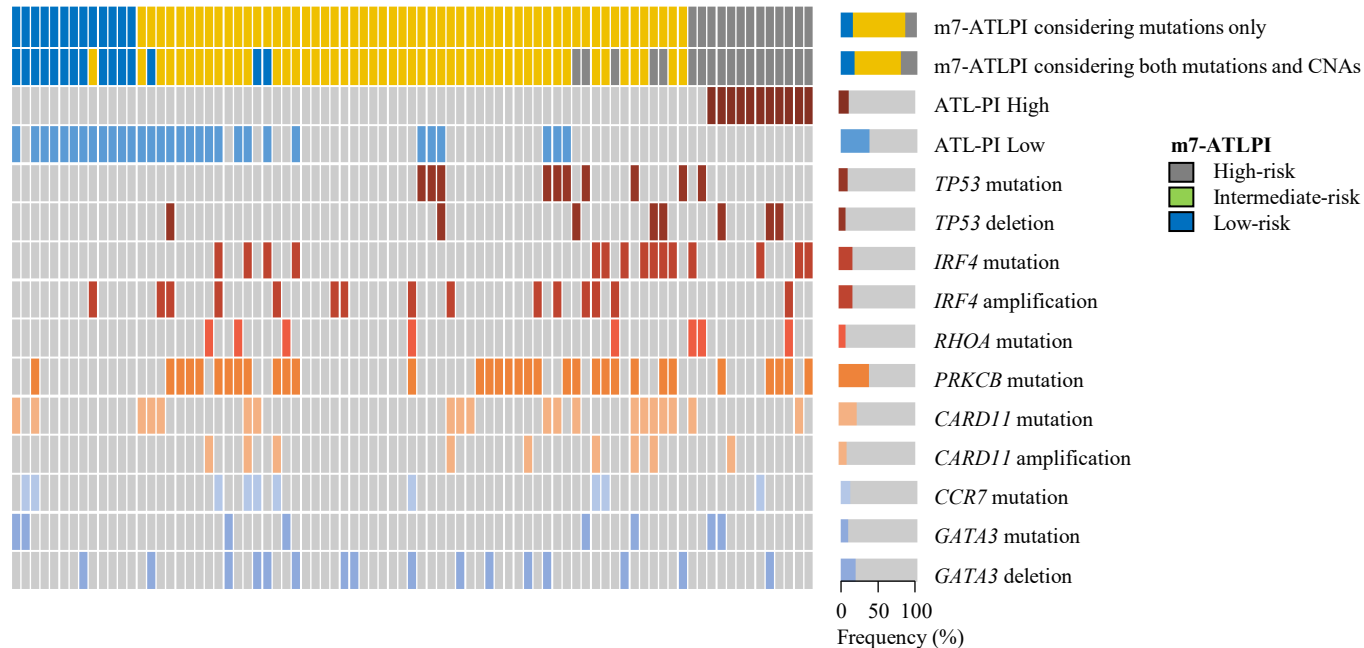

**(B)**

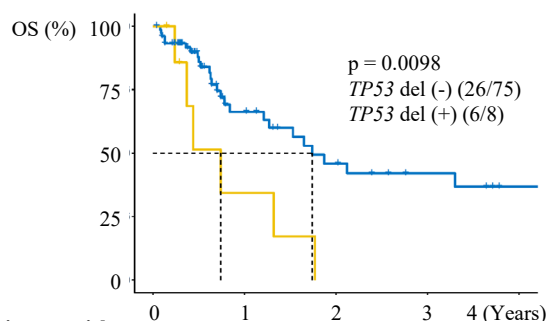

**Patients at risk**

|              |    |    |    |   |   |
|--------------|----|----|----|---|---|
| TP53 del (-) | 75 | 23 | 13 | 8 | 4 |
| TP53 del (+) | 8  | 2  | 0  | 0 | 0 |

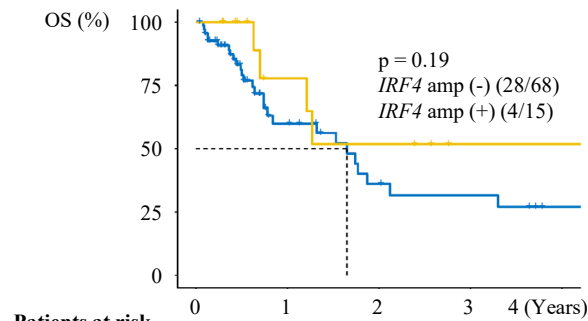

**Patients at risk**

|              |    |    |   |   |   |
|--------------|----|----|---|---|---|
| IRF4 amp (-) | 68 | 19 | 9 | 7 | 3 |
| IRF4 amp (+) | 15 | 6  | 4 | 1 | 1 |

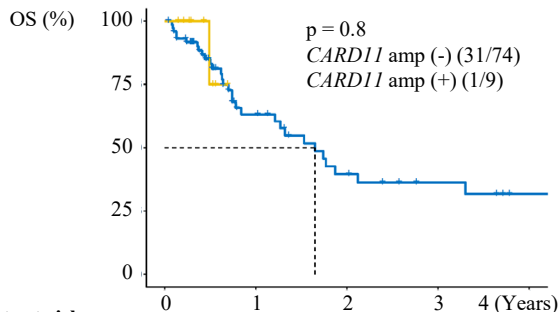

**Patients at risk**

|                |    |    |    |   |   |
|----------------|----|----|----|---|---|
| CARD11 amp (-) | 74 | 25 | 13 | 8 | 4 |
| CARD11 amp (+) | 9  | 0  | 0  | 0 | 0 |

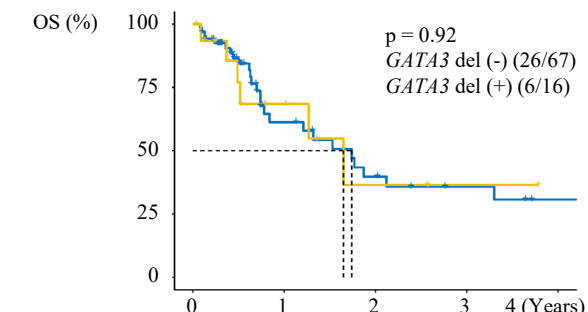

**Patients at risk**

|               |    |    |    |   |   |
|---------------|----|----|----|---|---|
| GATA3 del (-) | 67 | 19 | 11 | 7 | 4 |
| GATA3 del (+) | 16 | 6  | 2  | 1 | 0 |

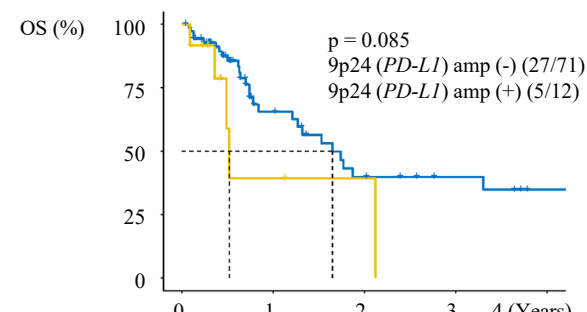

**Patients at risk**

|              |    |    |    |   |   |
|--------------|----|----|----|---|---|
| 9p24 amp (-) | 71 | 23 | 12 | 8 | 4 |
| 9p24 amp (+) | 12 | 2  | 1  | 0 | 0 |

**Supplemental Figure 10 (Continued)**

(C)

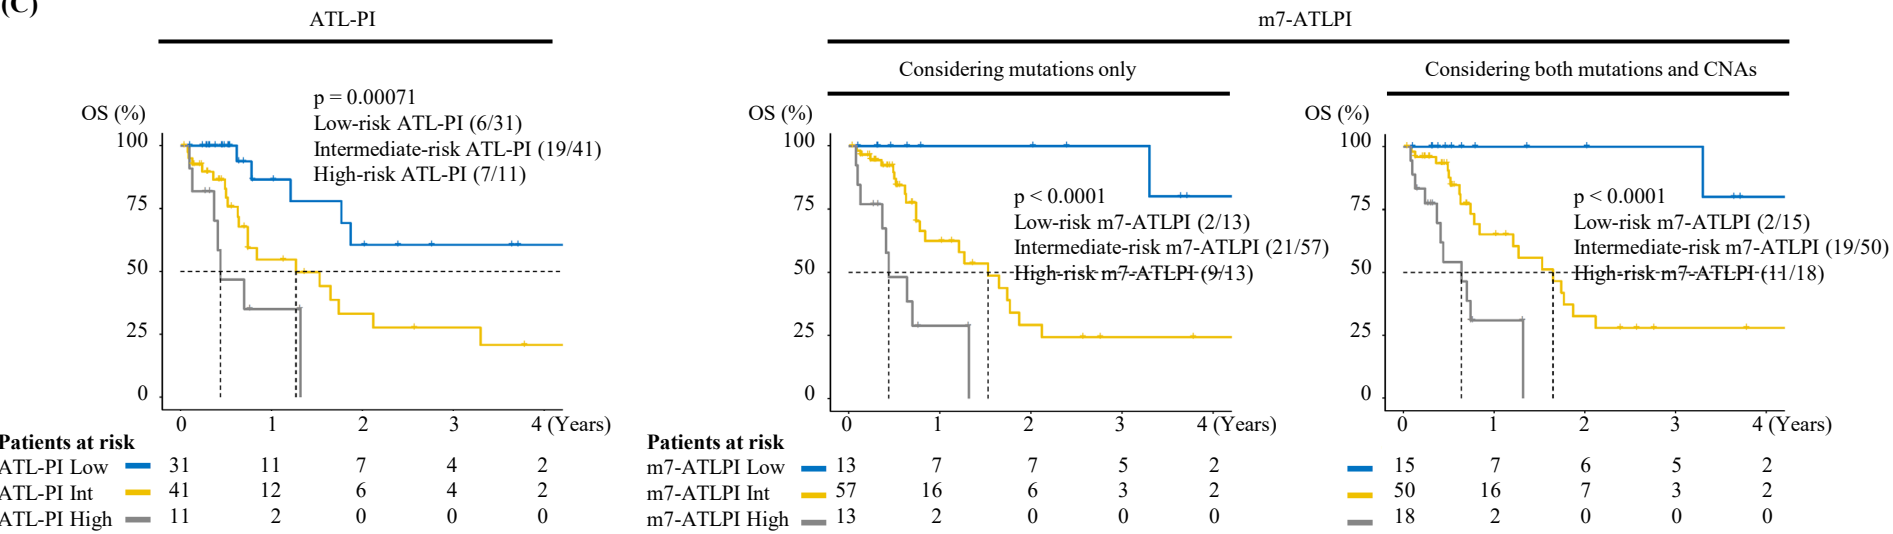



**Supplemental Figure 10. m7-ATLPI considering both mutations and CNAs as risk factors.**

(A) Comparison of risk categories defined by the m7-ATLPI considering mutations only vs. both mutations and CNAs. m7-ATLPI categorizations of patients according to mutations and/or CNA data are shown along with clinical (ATL-PI categories) and molecular predictors. Boxes indicate high- or low-risk ATL-PI categories, or mutations or CNAs in the indicated genes. Color codes indicate coefficients of individual m7-ATLPI predictors.

(B) Kaplan-Meier curves classified by the presence or absence of CNAs for four genes (*TP53*, *IRF4*, *CARD11*, and *GATA3*) and 9p24 (*PD-L1*). Del, deletion; amp, amplification.

(C) OS of patients based on mutation and CNA data. OS is stratified by the ATL-PI, m7-ATLPI considering mutations only, and m7-ATLPI considering both mutations and CNAs.

**Supplemental Figure 11**

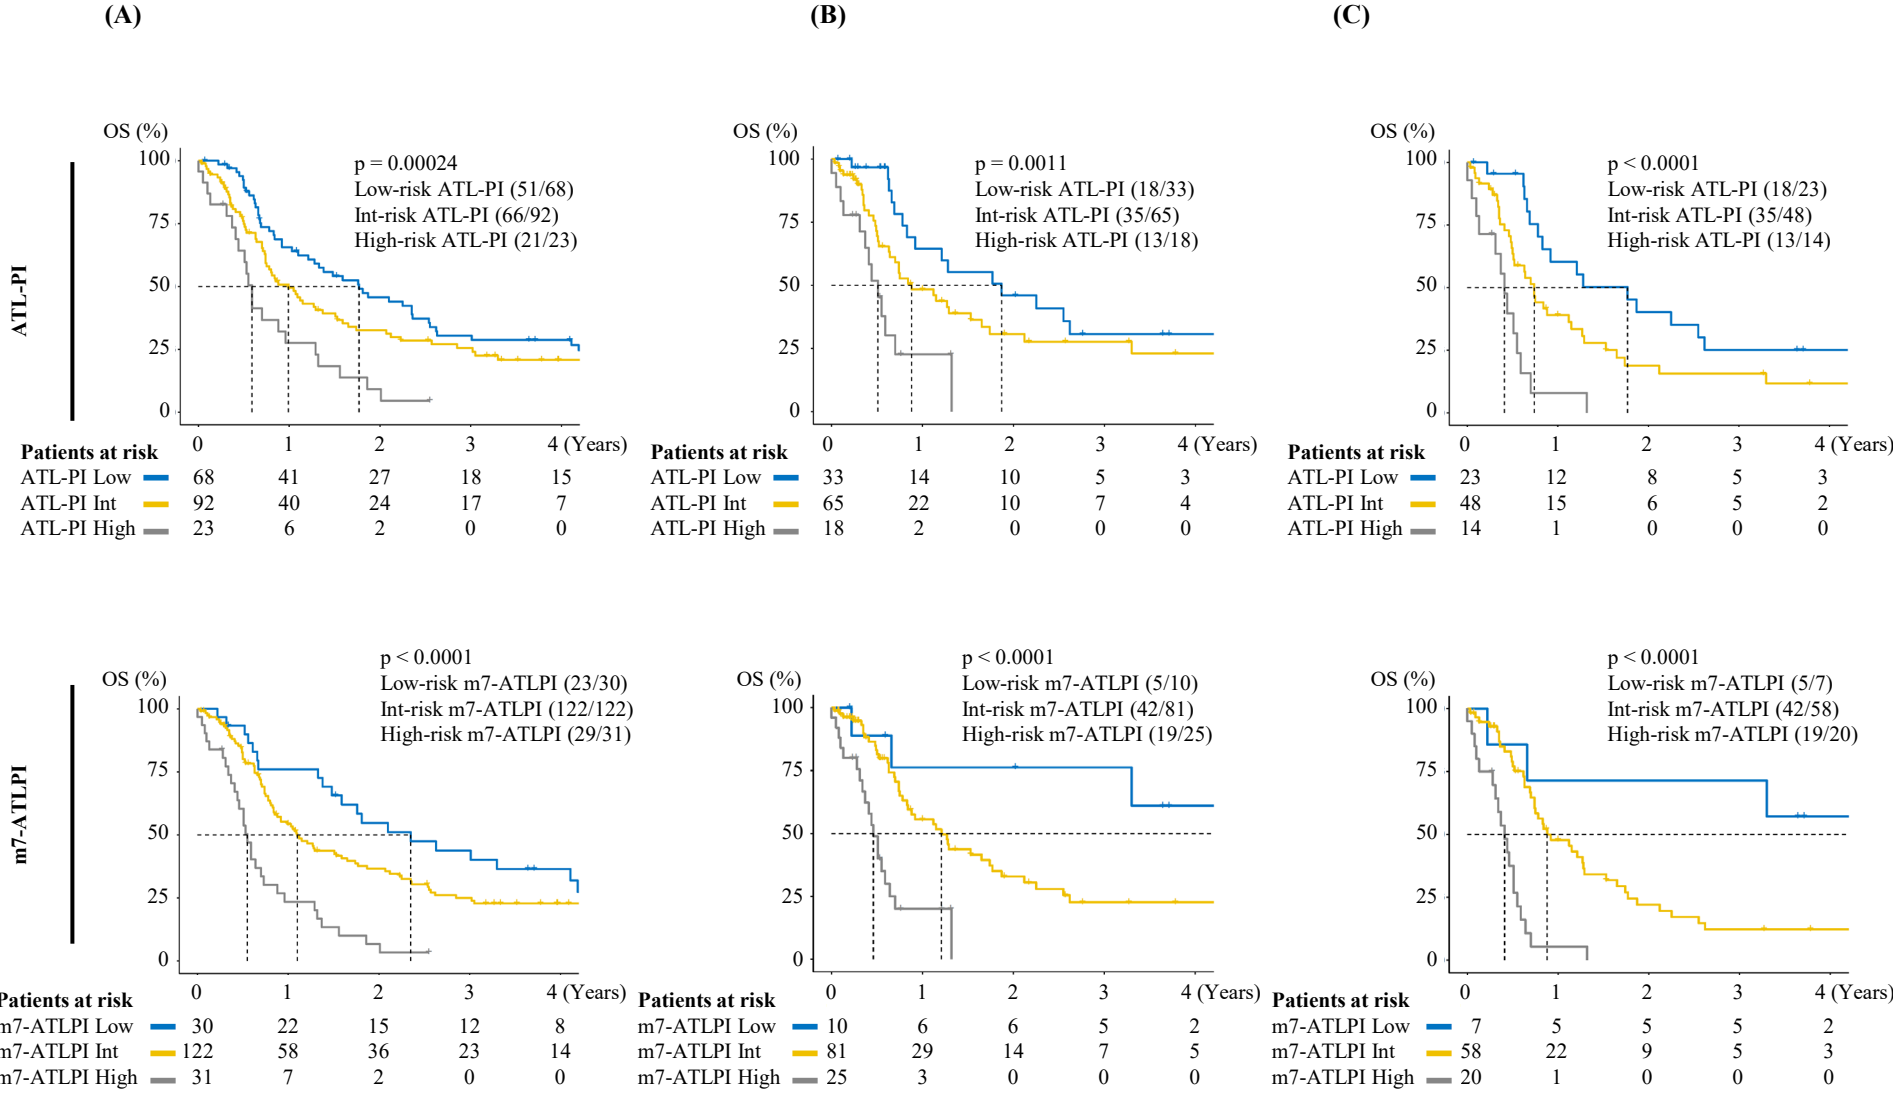

**Supplemental Figure 11. Kaplan-Meier OS curves according to the ATL-PI and m7-ATLPI.**

(A) Kaplan-Meier OS curves according to the ATL-PI and m7-ATLPI for the entire cohort (n = 183). Patients were not censored when they underwent allo-HSCT or mogamulizumab therapy.

(B) Kaplan-Meier OS curves according to the ATL-PI and m7-ATLPI for the entire cohort, excluding patients treated with allo-HSCT (n = 116). Patients were not censored when they underwent mogamulizumab therapy.

(C) Kaplan-Meier OS curves according to the ATL-PI and m7-ATLPI for the entire cohort, excluding patients who received allo-HSCT or mogamulizumab therapy (n = 85).

Numbers in parentheses indicate the number of patients with events / number of patients per cohort.

(A)

Patients received mogamulizumab as second-line or later therapy in chemotherapy-resistant status

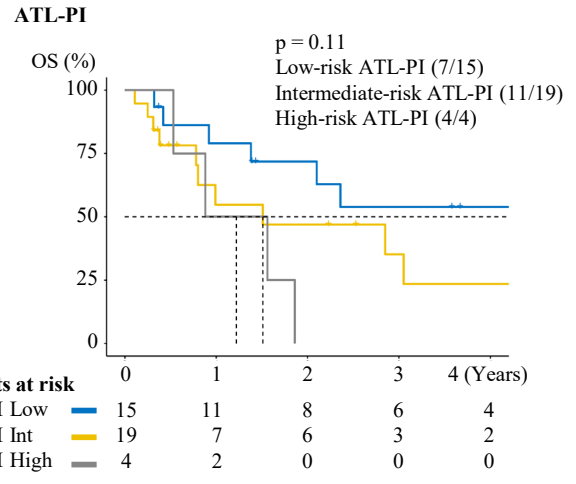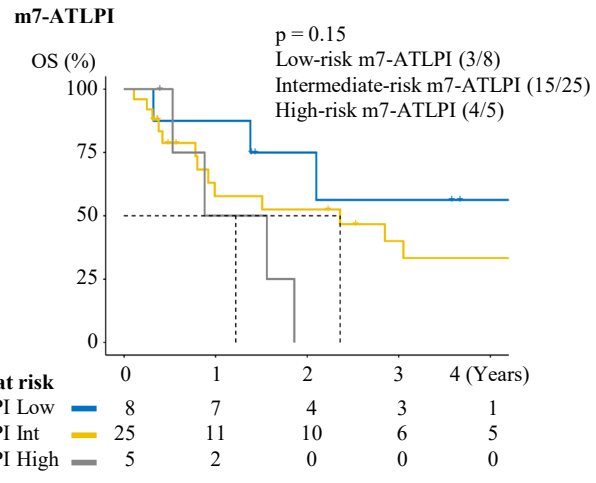

(B)

Patients treated with allo-HSCT

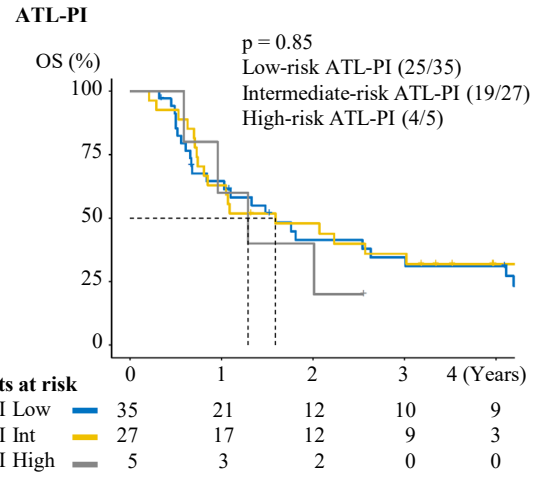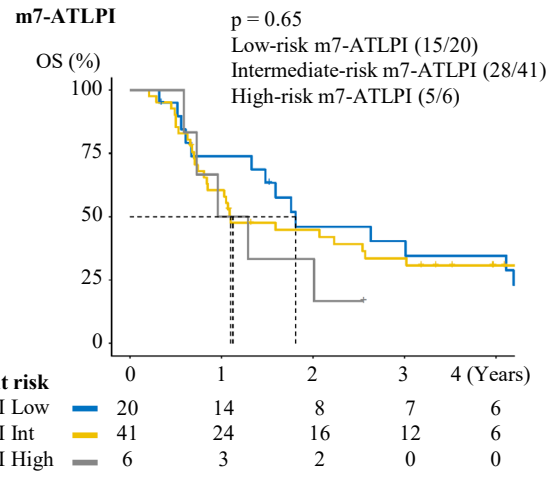

**Supplemental Figure 12. Kaplan-Meier OS curves according to the ATL-PI or m7-ATLPI for patients who received immunochemotherapy (A) or allo-HSCT (B).**

(A) Among patients in the entire cohort, 38 received mogamulizumab as second-line or later therapy in chemotherapy-resistant status. Survival curves of the 38 patients are shown using survival data from the date of diagnosis. There was no difference between the ATL-PI and m7-ATLPI stratification, and the m7-ATLPI could not identify those with favorable risk. In this analysis, patients were censored on the date of allo-HSCT but not on the date of mogamulizumab administration.

(B) In the entire cohort, 67 patients underwent allo-HSCT. There was no difference between the ATL-PI and m7-ATLPI stratification of these patients, and m7-ATLPI could not identify those with favorable risk. In this analysis, patients were not censored on the date of allo-HSCT or on the date of mogamulizumab administration.

Numbers on Kaplan-Meier OS curves indicate number of patients with events / number of patients per cohort.

Supplemental Figure 13

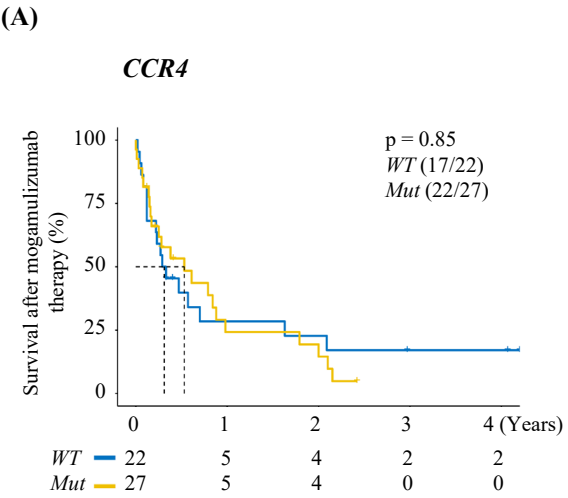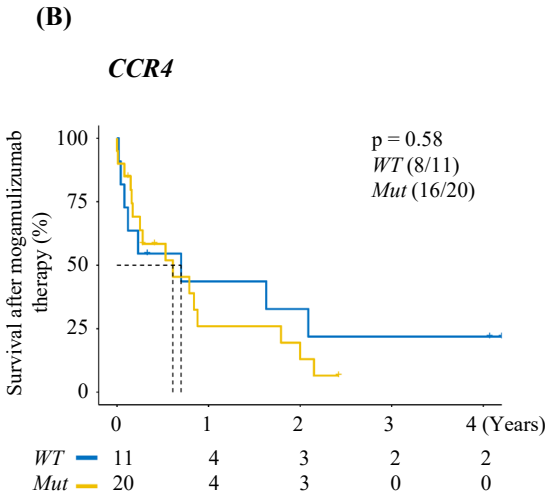

**Supplemental Figure 13. Kaplan-Meier survival curves after mogamulizumab therapy according to *CCR4* mutation status in patients in the entire cohort treated with immunochemotherapy.**

(A) Survival curves after mogamulizumab therapy according to *CCR4* mutation status are shown for patients in the entire cohort treated with mogamulizumab (n = 49).

(B) Survival curves after mogamulizumab therapy according to *CCR4* mutation status for patients in the entire cohort treated with mogamulizumab but without allo-HSCT (n = 31). *WT*, wild type; *Mut*, mutated.

Numbers on Kaplan-Meier OS curves indicate number of patients with events / number of patients per cohort.

### Supplemental Reference

1. WHO Classification of Tumors of Haematopoietic and Lymphoid Tissues: Adult T-cell leukaemia/lymphoma (ed. by Swerdlow, S.H. et al.). IARC press Lyon:281-84, 2008
2. Tsukasaki K, Hermine O, Bazarbachi A, et al: Definition, prognostic factors, treatment, and response criteria of adult T-cell leukemia-lymphoma: a proposal from an international consensus meeting. *Journal of clinical oncology : official journal of the American Society of Clinical Oncology* 27:453-9, 2009
3. Kataoka K, Iwanaga M, Yasunaga JI, et al: Prognostic relevance of integrated genetic profiling in adult T-cell leukemia/lymphoma. *Blood* 131:215-225, 2018
4. Kataoka K, Nagata Y, Kitanaka A, et al: Integrated molecular analysis of adult T cell leukemia/lymphoma. *Nat Genet* 47:1304-15, 2015
5. Zou H, Hastie T: Regularization and Variable Selection via the Elastic Net. *Journal of the Royal Statistical Society. Series B (Statistical Methodology)* 67:301-320, 2005
6. Nagata Y, Kontani K, Enami T, et al: Variegated RHOA mutations in adult T-cell leukemia/lymphoma. *Blood* 127:596-604, 2016
